# Supplementary material for: Meditation and yoga for irritable bowel syndrome: study protocol for a randomised clinical trial (MY-IBS study)
Source: PubMed Central journal article supplement — BMJ Open. 2022 May 25;12(5):e059604. doi: 10.1136/bmjopen-2021-059604 (PMC9137346; doi:10.1136/bmjopen-2021-059604), 2022-05-25
Supplement: bmjopen-2021-059604.draft_revisions.pdf [file bmjopen-2021-059604.draft_revisions.pdf]

# BMJ Open

BMJ Open is committed to open peer review. As part of this commitment we make the peer review history of every article we publish publicly available.

When an article is published we post the peer reviewers' comments and the authors' responses online. We also post the versions of the paper that were used during peer review. These are the versions that the peer review comments apply to.

The versions of the paper that follow are the versions that were submitted during the peer review process. They are not the versions of record or the final published versions. They should not be cited or distributed as the published version of this manuscript.

BMJ Open is an open access journal and the full, final, typeset and author-corrected version of record of the manuscript is available on our site with no access controls, subscription charges or pay-per-view fees (<http://bmjopen.bmj.com>).

If you have any questions on BMJ Open's open peer review process please email [info.bmjopen@bmj.com](mailto:info.bmjopen@bmj.com)

# BMJ Open

## Meditation and Yoga for Irritable Bowel Syndrome: Study Protocol for a Randomized Clinical Trial (MY-IBS Study)

|                               |                                                                                                                                                                                                                                                                                                                                                                                                                                                                                                                                             |
|-------------------------------|---------------------------------------------------------------------------------------------------------------------------------------------------------------------------------------------------------------------------------------------------------------------------------------------------------------------------------------------------------------------------------------------------------------------------------------------------------------------------------------------------------------------------------------------|
| Journal:                      | <i>BMJ Open</i>                                                                                                                                                                                                                                                                                                                                                                                                                                                                                                                             |
| Manuscript ID                 | bmjopen-2021-059604                                                                                                                                                                                                                                                                                                                                                                                                                                                                                                                         |
| Article Type:                 | Protocol                                                                                                                                                                                                                                                                                                                                                                                                                                                                                                                                    |
| Date Submitted by the Author: | 25-Nov-2021                                                                                                                                                                                                                                                                                                                                                                                                                                                                                                                                 |
| Complete List of Authors:     | D'Silva, Adrijana; University of Calgary, Department of Community Health Sciences<br>Marshall, Deborah; University of Calgary, Department of Community Health Sciences<br>Vallance, Jeffrey; Athabasca University<br>Nasser, Yasmin; University of Calgary, Department of Medicine; University of Calgary, Department of Medicine<br>Rajagopalan, Vidya; University of Calgary, Department of Medicine<br>MacKean, Gail; University of Calgary, Department of Community Health Sciences<br>Raman, Maitreyi; University of Calgary, Medicine |
| Keywords:                     | Clinical trials < THERAPEUTICS, Functional bowel disorders < GASTROENTEROLOGY, MENTAL HEALTH                                                                                                                                                                                                                                                                                                                                                                                                                                                |
|                               |                                                                                                                                                                                                                                                                                                                                                                                                                                                                                                                                             |

SCHOLARONE™  
Manuscripts

## MEDITATION AND YOGA FOR IBS

**Meditation and Yoga for Irritable Bowel Syndrome:****Study Protocol for a Randomized Clinical Trial (MY-IBS Study)**

Adrijana D'Silva, MHS<sup>1</sup>, Deborah A Marshall, PhD<sup>1,2</sup>, Jeff K. Vallance, PhD<sup>3</sup>, Yasmin Nasser, MD, PhD<sup>4,5</sup>, Vidya Rajagopalan, MHA<sup>4</sup>, Gail MacKean<sup>1</sup>, PhD, Maitreyi Raman, MD<sup>4</sup>

<sup>1</sup>Department of Community Health Sciences, Cumming School of Medicine, University of Calgary, Calgary, Canada

<sup>2</sup>Arthur J.E. Child Chair, Department of Medicine, Cumming School of Medicine, University of Calgary

<sup>3</sup>Faculty of Health Disciplines, Athabasca University, Athabasca, Canada

<sup>4</sup>Division of Gastroenterology and Hepatology, Department of Medicine, Cumming School of Medicine, University of Calgary

<sup>5</sup>Snyder Institute for Chronic Disease, Cumming School of Medicine, University of Calgary

Adrijana D'Silva

[adrijana.dsilva@ucalgary.ca](mailto:adrijana.dsilva@ucalgary.ca)

3280 Hospital Drive NW, Calgary, Alberta, T2N 4Z6

Deborah A Marshall

[damarsha@ucalgary.ca](mailto:damarsha@ucalgary.ca)

3280 Hospital Drive NW, Calgary, Alberta, T2N 4Z6

Jeff K. Vallance

[jeffv@athabascau.ca](mailto:jeffv@athabascau.ca)

1 University Drive, Athabasca, Alberta, T9S 3A3

Yasmin Nasser

[ynasser@ucalgary.ca](mailto:ynasser@ucalgary.ca)

3330 Hospital Drive NW Calgary, AB T2N 4N1

Vidya Rajagopalan

[vidya.rajagopalan@ucalgary.ca](mailto:vidya.rajagopalan@ucalgary.ca)

3280 Hospital Drive NW, Calgary, Alberta, T2N 4Z6

Gail MacKean

[glmackea@ucalgary.ca](mailto:glmackea@ucalgary.ca)

3280 Hospital Drive NW, Calgary, Alberta, T2N 4Z6

## MEDITATION AND YOGA FOR IBS

Maitreyi Raman

[mkothand@ucalgary.ca](mailto:mkothand@ucalgary.ca)

3280 Hospital Drive NW, Calgary, Alberta, T2N 4Z6

Corresponding Author:

Dr. Maitreyi Raman

6D33 TRW Building

3280 Hospital Drive NW

Calgary, AB, T2N 4N1, Canada

Email: [mkothand@ucalgary.ca](mailto:mkothand@ucalgary.ca)

For peer review only

## MEDITATION AND YOGA FOR IBS

**Abstract**

**Introduction:** When delivered in person, yoga has been shown to be effective in managing Irritable Bowel Syndrome (IBS) symptoms. Research is needed to test the feasibility and effectiveness of yoga as a therapeutic option when delivered virtually. The primary aim of the MY-IBS randomized controlled trial is to determine the effects of an eight-week virtual meditation and yoga intervention on IBS symptom severity compared with an advice-only active control group.

**Methods and analysis:** Adults diagnosed with IBS will be randomized to receive either a Hatha yoga intervention or an advice-only control group. The intervention will consist of weekly online classes for eight weeks delivered by a facilitator using Microsoft Office Teams and daily home practice. Feasibility will be evaluated by examining recruitment and attrition rates, adherence, participant satisfaction with the program, and safety. The primary outcome is IBS symptom severity, and key secondary outcomes include (but not limited to) quality of life, anxiety and depression symptoms, COVID-19 related stress and anxiety, and fatigue. Outcomes will be assessed at baseline, four weeks, and eight weeks. An embedded design experimental model sub-study will be conducted post-intervention using qualitative research methods to identify participants' experiences in the yoga program.

**Ethics and dissemination:** This study has been approved by the Conjoint Health Research Ethics Board (REB ID 20-0084). Findings will be disseminated through peer-reviewed publication, conference presentation, and social media.

**Trial registration number:** NCT04302623

## MEDITATION AND YOGA FOR IBS

**Introduction**

Stress is a physical, mental, or emotional response that causes tension in the mind or the body<sup>1</sup>. Altered stress response from psychological and physiological mechanisms may contribute to altered brain-gut signaling patterns and IBS symptoms. Psychological stressors, such as depression and anxiety, may influence gut function (e.g., reduced motility). Physiological stressors (e.g., infection) in the gut may affect the brain<sup>2</sup>. Therapies focusing on mind-body interactions and stress reduction may be adjunctive treatments for IBS. Stress management techniques that include both mind and body interventions such as yoga<sup>3</sup> have been effective in improving IBS symptom severity and mental health outcomes<sup>3 4</sup>. Mind-body interventions may modulate the brain-gut axis directly by reducing sympathetic activity and increasing parasympathetic activity and the hypothalamus-pituitary-adrenal axis<sup>5</sup>.

Yoga is a traditional *mind-body-breath* discipline that includes a triad of postures, structured breathing, and meditation<sup>6</sup>. Our recent review<sup>7</sup> identified four randomized controlled trials that examined traditional yoga practice as therapy for IBS patients<sup>8-11</sup>. These trials demonstrated yoga was more effective compared to pharmacological treatment and equally effective as dietary interventions or moderate-intensity walking. Physical and mental health improvements included IBS symptom severity, gastric motility, and depression.

Research is needed to determine the feasibility and effectiveness of virtual yoga programming as a therapeutic option for patients with IBS. The rationale for virtually delivered interventions to manage IBS is increasing due to rising demand, limited healthcare resources, and cost-effectiveness<sup>12 13</sup>. A recent review found virtual care tools may be effective in managing disease activity and improving outcomes in patients with digestive diseases<sup>14</sup>. This review also highlighted the high acceptability and satisfaction with virtual care among patients with IBS<sup>15-19</sup>.

## MEDITATION AND YOGA FOR IBS

The primary objective of the MY-IBS (Meditation and Yoga for Irritable Bowel Syndrome) study is to explore the feasibility and effectiveness of a virtual yoga program for patients with IBS. MY-IBS is a mixed-methods study including a randomized controlled trial and semi-structured interviews. The primary aim of this randomized controlled trial is to determine the effects of an eight-week virtual yoga intervention on IBS symptom severity, measured with the IBS Symptoms Severity Scale, compared to an advice-only control group. Secondary aims are to determine whether a) a yoga program delivered virtually is feasible for adults with IBS, b) improves health outcomes including quality of life, stress, and fatigue, and c) improves mental health outcomes including depression and anxiety symptoms. An embedded design experimental model qualitative sub-study using semi-structured interviews will explore and describe participants' experiences in the yoga program, and its impact. We hypothesize that the program will be feasible and effective in improving outcomes in the intervention group compared to the control group.

### Methods and Analysis

#### Study design overview

The quantitative study is a superiority randomized non-blinded two-group controlled trial. The qualitative study will use semi-structured interviews and thematic analysis to explore and describe intervention participant experiences and views of the yoga program.

#### Patient involvement

## MEDITATION AND YOGA FOR IBS

1  
2  
3 Patients with lived experience were involved in the conduct of this study. During the  
4 development stage, patient partners were invited to participate in a series of discussions with the  
5 research team to define the study research question, study design, choice of outcome measures,  
6 and methods of recruitment. Following the completion of the trial, the patient partners will be  
7 involved in the dissemination of this research.  
8  
9  
10  
11  
12  
13

### **Sample and selection**

14  
15  
16  
17 The MY-IBS stud will be conducted at the University of Calgary in Alberta, Canada. To  
18 be eligible in this study, participants must be diagnosed with IBS based on Rome IV criteria by a  
19 health care professional (e.g., physician, nurse, dietician), be 18-70 years old, have an adequate  
20 understanding of English, have an ability to provide written informed consent, score at least 75  
21 out of 500 points on the IBS Symptoms Severity Scale indicating mild IBS symptoms, and be on  
22 stable doses of medications for IBS (including anti-depressants) without major changes to diet or  
23 physical activity levels for at least eight weeks prior to starting the intervention. Individuals  
24 across Canada are eligible to participate. Exclusion criteria include a major physical impairment  
25 that would prevent the individual from doing yoga determined by either the patient or the study  
26 coordinator, and diagnosis of any major cognitive, psychological, or psychiatric disorder (e.g.,  
27 major depression, schizophrenia) as identified by the treating physician or healthcare practitioner  
28 or screened by the study coordinator using the Patient Health Questionnaire-9.  
29  
30  
31  
32  
33  
34  
35  
36  
37  
38  
39  
40  
41  
42  
43  
44

45 Participants will be identified through (a) gastroenterology clinics across Calgary,  
46 Alberta; (b) gastroenterologists across Canada who indicated interest in this study for their IBS  
47 patients in a previous survey conducted by our team (not published); (c) participants from the  
48 previous survey who indicated interest in this study and have given consent to be contacted; (d)  
49 through social media; (e) self-referrals through the study website and the University of Calgary  
50  
51  
52  
53  
54  
55  
56  
57  
58  
59  
60



## MEDITATION AND YOGA FOR IBS

1  
2  
3 participate in research portal; (f) Canadian Association of Gastroenterologists monthly  
4  
5 newsletter; and (g) participants with IBS who are enrolled in the IMAGINE (Inflammation,  
6  
7 Microbiome and Alimentation Gastro-intestinal and Neuropsychiatric Effects) cohort study at the  
8  
9 University of Calgary and have given their consent to be contacted for future studies.  
10  
11

12 Participant screening will use the Patient Health Questionnaire-9 (PHQ-9). Individuals  
13  
14 who score 20 points or higher on the PHQ-9 indicating severe depression will not be eligible to  
15  
16 participate. Reasons for exclusion are lack of compliance in interventional studies among these  
17  
18 individuals, potential heterogeneity in the small sample size of participants, and skewed results if  
19  
20 patients seek treatment for their depression during the trial.  
21  
22

### **Interventions**

#### **Yoga intervention group**

23  
24  
25  
26  
27 Before their first class, the intervention group will receive an introductory video. The  
28  
29 video will consist of information on IBS, information on the style of yoga they will be learning,  
30  
31 and rationale for yoga as a treatment for IBS. The intervention will be delivered online by a  
32  
33 certified yoga facilitator in class sizes of less than ten participants using the Microsoft Office  
34  
35 Teams platform. Classes will be held once per week for the eight-week duration. The first  
36  
37 session will be approximately 90 minutes and subsequent sessions up to 60 minutes. The  
38  
39 introductory session will include the class setup, introductions, teaching poses, corrections, and  
40  
41 a question and answers period. The yoga facilitator will provide participants with modifications  
42  
43 for common challenges to support best practices and ensure safety. Subsequent classes will  
44  
45 include a review from the previous week, a question and answer period, individual corrections  
46  
47 and modifications, and introduce new practices. In addition to the online class component, study  
48  
49 staff will ask participants to practice the yoga program at home every day. They will also have  
50  
51  
52  
53  
54  
55  
56  
57  
58  
59  
60

## MEDITATION AND YOGA FOR IBS

access to the yoga videos, written program instructions, and frequently answered questions accessible through the study website to help support their home practice (<https://cumming.ucalgary.ca/research/ascend/resources/patient-resources/my-ibs>).

Upa Yoga, developed by the Isha Foundation of Inner Sciences (<https://isha.sadhguru.org/us/en>), will be promoted. Upa Yoga maintains the ancient principles of Hatha Yoga and will be delivered by a certified yoga facilitator from the Isha Foundation. The Upa Yoga program will consist of (a) directional movements and neck rotations, (b) hatha yoga-based Yoga Namaskar, (c) breathing practices or alternate nostril breathing, (d) mantra meditation consisting of AUM chanting (OM), and e) breath watching. Table 1 shows a description of the program and rationale. Our published prospective study examining the effectiveness of Upa Yoga in patients with Inflammatory Bowel Disease<sup>20</sup> shows improvements in mental health scores after an eight-week yoga program.

### **Advice-only control group**

Control participants will receive a video including general education on IBS, the mind-gut connection in IBS, and the role of mind-body therapies in the management of IBS. These participants will also receive a list of IBS-related resources from the Canadian Digestive Health Foundation, a link to an IBS patient support group ([www.ibspatient.org](http://www.ibspatient.org)), and information about physical activity guidelines from the World Health Organization. Control participants will be eligible to attend a two-week yoga program and receive the yoga videos eight weeks from the time of enrolment. Data on these participants will not be collected as this participation option is for participants who desire to receive the yoga sessions outside of the study.

### **Outcome measures**

#### **Feasibility outcomes**

## MEDITATION AND YOGA FOR IBS

1  
2  
3           *Recruitment, attendance, and attrition rates.* Recruitment will be calculated by the  
4 percentage of participants who complete the eligibility and enrollment phases of the study.  
5  
6 Attrition will be calculated by the percentage of participants who complete all study measures at  
7  
8 baseline and eight weeks. A feasible intervention will be defined as class attendance of at least  
9  
10 75 percent (i.e., attendance in six out of eight classes)<sup>9</sup> and attrition rate of less than 30 percent.  
11  
12  
13

14           *Adherence.* Adherence will be defined as practicing daily yoga for at least 80% of days  
15 for eight weeks (or 45 out of 56 days minimum). Each week a practice log will be provided to  
16 monitor frequency and length of yoga. The yoga facilitator will take attendance during each  
17 online class. To increase program adherence, the study coordinator will email intervention  
18 participants weekly. Six months following the completion of the intervention, participants will  
19 be asked to report the average frequency (i.e., days per month) and duration (i.e., minutes) of  
20 their yoga practices over the last seven days to evaluate long-term maintenance.  
21  
22  
23  
24  
25  
26  
27  
28  
29

30           *Program satisfaction.* Intervention participants will complete a survey regarding overall  
31 satisfaction with their program, including satisfaction with videos and online class instruction.  
32  
33 Videos and online classes will be deemed acceptable if at least 70% of participants are at least  
34 satisfied (i.e., rank classes as either good, great, or excellent). Participants will also indicate  
35 whether they would recommend the program to others on a scale from 1 (strongly disagree) to 7  
36 (strongly agree) and provide feedback on how the program could be improved.  
37  
38  
39  
40  
41  
42  
43

44           *Assessment of harms.* The study coordinator will screen potential participants and  
45 exclude those with any physical problems that may limit participation with yoga postures.  
46  
47 Participants will be asked to report any adverse events experienced during the study period.  
48  
49 Participants with adverse events (e.g., injury resulting from the program) will be advised to  
50 consult their physician to provide care as appropriate.  
51  
52  
53  
54  
55  
56  
57  
58  
59  
60

## MEDITATION AND YOGA FOR IBS

### **Effectiveness outcomes**

The primary outcome, IBS symptoms, will be measured using the *IBS-Symptom Severity Scale (IBS-SSS)*. The IBS-SSS is a five-question survey that asks the severity of abdominal pain, frequency of abdominal pain, severity of abdominal distention, dissatisfaction with bowel habits, and interference with QOL over the past 10 days. Scores on the IBS-SSS range from 0 to 500 with higher scores indicating more severe symptoms. Participants can be categorized as having mild (75-175), moderate (175-300), or severe (>300) IBS. Symptom reduction of at least 50 points is considered clinically meaningful.

Secondary outcomes (*and their measures*) include quality of life (*IBS-Quality of life*), anxiety (*Generalized Anxiety Disorder-7*), depression (*Patient Health Questionnaire-9*), stress (*Perceived Stress Scale*), COVID-19 stress (*COVID-19 Stress Scale*), fatigue (*Modified Fatigue Impact Scale-21*), somatic Symptoms (*Patient Health Questionnaire-15*), and self-compassion (*Self Compassion Scale-Short Form*) (Supplementary Table 1). Intention to practice yoga will also be assessed. The intervention and control groups will be assessed on effectiveness outcomes at baseline, four, and eight weeks. The intervention group will complete measures of effectiveness outcomes six months after the intervention.

### **Sample size**

## MEDITATION AND YOGA FOR IBS

We will recruit twenty-five participants per group. However, assuming 30% attrition rate, we will aim to recruit 33 participants per group. Symptom reduction of at least 50 points is considered clinically meaningful, however a group difference has been shown to represent a considerable self-reported improvement<sup>21</sup>. We calculated the sample size using a mean difference of at least 83 points on the IBS-SSS ( $\alpha=0.05$ ,  $\beta=0.80$ , standard deviation of 103.8)<sup>9</sup>.

### **Randomization, treatment allocation, and blinding**

Study flow is shown in Figure 1. The study coordinator will obtain consent from participants who will then be enrolled in the study. Participants will be randomized after baseline assessment to either the yoga intervention or the advice-only control group. A statistician blinded to the randomization key will create a computer-generated REDCap randomized sequence to allocate participants. Participants will be aware of the group to which they are allocated, however, the principal investigator and data analyst will remain blinded to the randomization process.

### **Data management**

All quantitative data will be entered into a secure REDCap database at the University of Calgary. After the study, data will be downloaded, and patient identifiers will be removed from the data file. Data will be stored in a password-protected file on a University of Calgary password protected computer. The interviews will be transcribed, deidentified, and uploaded to the University of Calgary's secure SharePoint site. Only the research team will have access to the data.

### **Statistical analysis**

Descriptive analysis will summarize participant characteristics and feasibility outcomes. Univariate analysis of variance (ANOVA) will examine baseline differences between groups for

## MEDITATION AND YOGA FOR IBS

variables with continuous data. Chi-square tests will examine baseline differences between groups for categorical variables. Unadjusted ANOVA and adjusted analysis of covariance (ANCOVA) models will compare differences in scores from baseline and post-intervention data within and between groups using intent to treat and per protocol analysis. A logistic regression – model examining determinants of responders (a minimum improvement of at least 50 points on the IBS-SSS scale) versus non-responders will be developed to predict a response to the intervention. This model will consider practice in minutes, baseline depression, anxiety, and IBS symptom severity scores. An  $\alpha$  of 0.05 will be the threshold for determining statistical significance. If the frequency of missing data is >5%, we will perform additional analyses using imputation methods. Analysis will be conducted using SPSS version 26.

### **Post-intervention interviews**

Participants who were randomized to the intervention and did not withdraw from the study will be invited by email to participate in an interview. We aim to recruit men and women and have equal representation of those who benefited from the program (i.e., experienced improvements in their IBS symptom severity) as well as individuals who did not. We anticipate needing to interview between 10 and 15 participants to reach both code and meaning saturation<sup>22</sup> aiming for a maximum variation sample.

Semi-structured interviews will capture participants' experiences, program satisfaction, facilitators and barriers to participation, perceptions of social support and supervised learning, perceived impact on IBS symptoms and overall physical and mental health, and input on improving future programming (Table 2). Interviews will happen virtually using Microsoft Office Teams and be approximately 30 to 45 minutes in length. The study coordinator will interview the participants, take notes during the interview, and reflect following each interview.

## MEDITATION AND YOGA FOR IBS

1  
2  
3 Interview recordings will be transcribed verbatim without identifying information. Data will be  
4  
5 coded and analyzed in duplicate using NVivo 12. Thematic analysis inductively reveals patterns  
6  
7 and themes providing an understanding of participant experiences, with the program and their  
8  
9 perspectives on its impact. Thematic analysis is a method for systematically identifying,  
10  
11 organizing, and offering insight into patterns of meaning (themes) across a data set <sup>23</sup>. This  
12  
13 method makes sense of shared meanings and experiences that allows the researcher to identify  
14  
15 what data is important to the research question <sup>24</sup>.  
16  
17  
18  
19  
20  
21

### Discussion

22  
23  
24 The MY-IBS study aims to determine the feasibility and effectiveness of an eight-week  
25  
26 virtual yoga and meditation program combined with home-based practice for patients with IBS.  
27  
28 Determining feasibility will be based on study recruitment, adherence, safety, and program  
29  
30 satisfaction. Improved IBS symptom management (the primary outcome) will determine  
31  
32 intervention effectiveness. Secondary outcomes include quality of life, stress, fatigue,  
33  
34 depression, anxiety, COVID-19-related stress and anxiety, and self-compassion. These findings  
35  
36 will inform potential predictors of responders versus non-responders. Predictors may be  
37  
38 considered in clinical practice to target the IBS patients most likely to benefit from the yoga  
39  
40 intervention. Interview themes and patterns will refine and inform the development of future  
41  
42 virtual yoga programming designed for IBS patients.  
43  
44  
45  
46

47 To our knowledge, there are no studies of virtual yoga and meditation in the IBS  
48  
49 population. The findings from this study may have implications for the management of IBS. The  
50  
51 virtual delivery of yoga represents an opportunity to increase access to effective management  
52  
53 therapies for patients with IBS. The COVID-19 pandemic has called for the reorganization of  
54  
55  
56  
57  
58  
59  
60

## MEDITATION AND YOGA FOR IBS

1  
2  
3 health care including utilization of virtual care. Nearly 90% of care in the United States has been  
4  
5 delivered virtually since the pandemic<sup>25</sup>. Due to the COVID-19 pandemic, there is increased  
6  
7 psychological distress and gastrointestinal symptoms among individuals with IBS<sup>26,27</sup> compared  
8  
9 to individuals without IBS<sup>28</sup>. The present study offers a unique opportunity to examine  
10  
11 prospectively the feasibility and effectiveness of a yoga and meditation program delivered  
12  
13 virtually to individuals living with IBS with the COVID-19 pandemic restrictions taken into  
14  
15 consideration. Study findings may aid in developing interventions and services tailored to  
16  
17 patients with IBS. New insight into outcomes will be beneficial for healthcare leaders in  
18  
19 planning how to allocate existing resources to support these services and potentially lessen the  
20  
21 burden of IBS on both the individual and the health care system.  
22  
23  
24  
25  
26  
27

### **Ethics and dissemination**

#### **Ethics**

30  
31  
32 The study protocol, informed consent form, and other study documents were reviewed  
33  
34 and approved by the University of Calgary's ethics board. All protocol modifications will be  
35  
36 submitted for review and approval by the ethics board. The trial participants will be informed of  
37  
38 any modifications, and re-consented by the study coordinator, if required. Further, the trial  
39  
40 registry for this study will be updated.  
41  
42  
43

44 Participation is voluntary and will not influence standard clinical care. All participants  
45  
46 will provide informed written consent and have the right to withdraw from the study at any time.  
47  
48 Pending consent from the participant, all data collected up to the time of withdrawal will be used  
49  
50 in the final data analyses as advised by the CONSORT guidelines<sup>29</sup>.  
51  
52

#### **Dissemination**



## MEDITATION AND YOGA FOR IBS

1  
2  
3 Our targeted knowledge users and audiences will include researchers, healthcare  
4 professionals and service providers, persons with lived experiences, community groups, and  
5 professional organizations (e.g., Canadian Association of Gastroenterology). Our goal will be to  
6 increase topic area knowledge among these groups and inform future research. Our strategies  
7 will include conference presentations, publication in a peer reviewed journal, social media  
8 campaigns, development of virtually delivered tools such as mobile applications to increase  
9 accessibility and affordability and educational material distributed through the Digestive Health  
10 Foundation, IMAGINE SPOR Chronic Disease Network, and Primary Care Networks across  
11 Alberta.  
12  
13  
14  
15  
16  
17  
18  
19  
20  
21  
22  
23  
24  
25  
26  
27  
28  
29  
30  
31  
32  
33  
34  
35  
36  
37  
38  
39  
40  
41  
42  
43  
44  
45  
46  
47  
48  
49  
50  
51  
52  
53  
54  
55  
56  
57  
58  
59  
60

## MEDITATION AND YOGA FOR IBS

Table 1. Overview of the Upa Yoga program.

| Program Component                       | Description                                                                                                                                                                                                   | Rationale                                                                                                                                                                                                                                                                                                                                                                                                                                                                                                                                             |
|-----------------------------------------|---------------------------------------------------------------------------------------------------------------------------------------------------------------------------------------------------------------|-------------------------------------------------------------------------------------------------------------------------------------------------------------------------------------------------------------------------------------------------------------------------------------------------------------------------------------------------------------------------------------------------------------------------------------------------------------------------------------------------------------------------------------------------------|
| <i>Directional Movement of the Arms</i> | This practice involves extending the arms in four directions (sideways, front, up and down) by rotating the wrists, while consciously focusing on the inhalation and exhalation of breath with each movement. | Studies show that fibromyalgia is common among patients living with IBS <sup>30</sup> . This could lead to pain of the muscles and joints, fatigue, and sleep concerns. The principle behind this practice is to lubricate the fluids in the joints, increase circulation and activate the energy nodes in these joints. Doing these practices everyday can relieve muscle and joint stiffness and reduce pain over time. This practice is recommended by the Isha Foundation to increase strengths and flexibility in preparation for Yoga Namaskar. |
| <i>Neck Practices</i>                   | There are five sets of neck practices, each stretching the neck and final one working on the shoulder area.                                                                                                   | The main cause of neck pain is usually muscle tension. Perceived stress can increase muscle tension. These neck exercises help relieve stress that can aggravate IBS symptoms. This practice is recommended by the Isha Foundation to increase strengths and flexibility in preparation for Yoga Namaskar.                                                                                                                                                                                                                                            |
| <i>Yoga Namaskar</i>                    | This practice involves a series of seven consecutive steps of upper body stretching and squatting, aligned with breath.                                                                                       | This practice activates the lumbar region of the spine and strengthens the spinal muscles <sup>31</sup> . While Yoga Namaskar has not been specifically studied in patients with IBS, yoga squatting postures have been associated with significant decrease in depression among nine individuals with IBD <sup>20</sup> and anxiety in a randomized self as control study in 30 healthy subjects <sup>32</sup> .                                                                                                                                     |
| <i>Alternate Nostril</i>                | The participant sits cross-legged with the spine comfortably erect and eyes closed. Closing the right nostril with the thumb,                                                                                 | Alternate nostril breathing is traditionally considered to alleviate mental unrest and                                                                                                                                                                                                                                                                                                                                                                                                                                                                |

## MEDITATION AND YOGA FOR IBS

|                                         |                                                                                                                                                                                                                                                                                                                                                                                     |                                                                                                                                                                                                                                                                                                        |
|-----------------------------------------|-------------------------------------------------------------------------------------------------------------------------------------------------------------------------------------------------------------------------------------------------------------------------------------------------------------------------------------------------------------------------------------|--------------------------------------------------------------------------------------------------------------------------------------------------------------------------------------------------------------------------------------------------------------------------------------------------------|
| <i>Breathing (Nadi Shuddhi)</i>         | inhaling and exhaling through the left nostril. This is repeated on the right nostril by closing the left nostril with the ring finger.                                                                                                                                                                                                                                             | promote physical and mental balance. <sup>33 34</sup> It has been demonstrated to decrease perceived stress and improve autonomic function in a randomized control trial compared to control subjects in healthy male volunteers, and decreased state anxiety in a prospective study. <sup>35 36</sup> |
| <i>Mantra Meditation (AUM chanting)</i> | The participants sit cross-legged, and with eyes closed, uttering each of these 3 sounds 7 times. The important aspect to this utterance is the awareness of the reverberations each of the sounds produces in the corresponding parts of the body: a - below the navel, o - mid-point of the chest, m - pit of the throat.                                                         | This mantra is thought to facilitate energy flow, and through vibratory mechanisms, creates peace and harmony leading to increased mental alertness and may improve symptoms of depression. <sup>37 38</sup>                                                                                           |
| <i>Breath watching</i>                  | The participants sit cross-legged with eyes closed and hold a hand gesture called the Yoga Mudra (the tips of the thumb and index finger come together forming a circle). They are instructed to maintain a gentle focus on the mid-point between both eyebrows (at the level of the pineal gland), while being conscious of the gentle movement of breath happening in their body. | Breathing in a focused manner can be used as a tool to promote positive changes to the mind, body and emotions. <sup>39</sup> Significant reduction in the level of state anxiety was found in a group of healthy male volunteers when they practiced breath awareness. <sup>16</sup>                  |

## MEDITATION AND YOGA FOR IBS

Table 2. Semi-structured interview questions and probes.

- 1  
2  
3  
4  
5  
6  
7  
8  
9  
10  
11  
12  
13  
14  
15  
16  
17  
18  
19  
20  
21  
22  
23  
24  
25  
26  
27  
28  
29  
30  
31  
32  
33  
34  
35  
36  
37  
38  
39  
40  
41  
42  
43  
44  
45  
46  
47  
48  
49  
50  
51  
52  
53  
54  
55  
56  
57  
58  
59  
60
- 1. What have you done in the past to manage your IBS?**
  - a. Have you tried yoga or mediation?
  - b. Have you tried exercise?
- 2. I would like to start by asking you what you were hoping for or expecting from the program?**
  - a. Why did you join this study?
  - b. Did anyone influence your decision to join?
  - c. Did that meet your expectations?
- 3. Next, I would like to discuss your overall experience in the MY-IBS yoga program in which you participated. Could you describe for me what participating in this program was like for you?**
  - a. What did you like most about it?
  - b. What didn't you like?
  - c. Did this change over the course of the program?

**Sub-questions:** *yoga facilitator/supervision, the timing of sessions/scheduling, length of sessions, attending with other members, online experience versus in-person, social support/other participants.*

  - d. What was that like?
  - e. What stood out for you?
  - f. What emotions were you aware of at the time?
  - g. What else do you remember about that experience?
- 4. How has participating in this program affected how you manage or live with your IBS?**

**Sub-questions:** *change in IBS symptoms; physical health, fatigue; mental health - stress, anxiety, depression; feeling better about myself; ability to live with my IBS.*

  - a. Tell me more about that.
  - b. Can you give me an example of what you mean?
  - c. How has that affected you?
- 5. What, if anything, has helped you to do your practices at home?**

**Sub-questions:** *social support, family support, convenience*

  - a. Tell me more about that.
  - b. Can you give me an example of what you mean?
  - c. How has that affected you?
- 6. What challenges did you have, if any, doing your practices at home?**

**Sub-questions:** *family, supervision/safety, schedule/time*

  - a. Are you satisfied with how you did?
  - b. Tell me more about that.

## MEDITATION AND YOGA FOR IBS

- 1  
2  
3 c. Can you give me an example of what you mean?  
4 d. How has that affected you?  
5  
6  
7 **7. What, if anything, has helped you to attend the weekly online class?**  
8 **Sub-questions:** *social support, family support, HCP support, yoga facilitator,*  
9 *supervision/safety, online classes, schedule/length*  
10 a. Tell me more about that.  
11 b. Can you give me an example of what you mean?  
12 c. How has that affected you?  
13  
14  
15  
16 **8. What challenges did you have, if any, to attend the weekly online class?**  
17 **Sub-questions:** *social support, family, yoga facilitator, supervision/safety, online*  
18 *classes, schedule, technical difficulties*  
19 a. Are you satisfied with how you did?  
20 b. Tell me more about that.  
21 c. Can you give me an example of what you mean?  
22 d. How has that affected you?  
23  
24  
25  
26  
27 **9. We are interested in any ideas you have about how we might make this program**  
28 **better. What could we do differently?**  
29 **Sub-questions:** *content, timing, facilitator, videos, website, delivery, other supports*  
30 a. Would you explain that further?  
31 b. Can you give me an example of what you mean?  
32  
33  
34 **10. Based on your experience with yoga, would you incorporate yoga to help manage**  
35 **your IBS? If so, how?**  
36  
37  
38 **11. Before we conclude, is this anything else you would like to say about your**  
39 **experience with this program, that we haven't had a chance to talk about yet?**  
40  
41  
42  
43  
44  
45  
46  
47  
48  
49  
50  
51  
52  
53  
54  
55  
56  
57  
58  
59  
60

## MEDITATION AND YOGA FOR IBS

**Strengths and limitations of this study:**

- Mixed methods study composed of a trial and interviews
- First virtual yoga intervention in Irritable Bowel Syndrome
- Canada-wide recruitment
- Self-reported outcome measures
- Lack of data capture on frequency of yoga practice in the control group

**Authors' contributions:** State how each author was involved in writing the protocol.

AD is involved in all aspects of protocol design and lead author of the manuscript. DM, JKV, YN, VR, and GM assisted with design of the protocol respective to their expertise. DM and GM assisted with the qualitative aspects of the protocol. JKV lead the statistical aspects of the protocol. YN provided their clinical expertise and patient recruitment through the clinic. VR provided their expertise in yoga therapy. MR is the senior author on the protocol and has guided the work of this research to support AD with their training. All authors reviewed the manuscript for study design and provided critical insight into manuscript content and approved the final version for submission.

**Funding statement:** This research received no specific grant from any funding agency in the public, commercial or not-for-profit sectors. DM receives partial salary support through the Arthur J.E. Child Chair.

**Competing interests statement:** None declared.

**Data availability:** Deidentified participant data will be made available upon reasonable request from the study principal investigator.

MEDITATION AND YOGA FOR IBS

1  
2  
3  
4  
5  
6  
7  
8  
9  
10  
11  
12  
13  
14  
15  
16  
17  
18  
19  
20  
21  
22  
23  
24  
25  
26  
27  
28  
29  
30  
31  
32  
33  
34  
35  
36  
37  
38  
39  
40  
41  
42  
43  
44  
45  
46  
47  
48  
49  
50  
51  
52  
53  
54  
55  
56  
57  
58  
59  
60

Figure 1. Participant flowchart based on the CONSORT guidelines.

For peer review only

## MEDITATION AND YOGA FOR IBS

## References

1. Crosswell AD, Lockwood KG. Best practices for stress measurement: How to measure psychological stress in health research. *Health Psychol Open* 2020;7(2):2055102920933072. doi: 10.1177/2055102920933072 [published Online First: 2020/07/25]
2. Mayer EA, Labus JS, Tillisch K, et al. Towards a systems view of IBS. *Nat Rev Gastroenterol Hepatol* 2015;12(10):592-605. doi: 10.1038/nrgastro.2015.121 [published Online First: 2015/08/26]
3. Schumann D, Anheyer D, Lauche R, et al. Effect of Yoga in the Therapy of Irritable Bowel Syndrome: A Systematic Review. *Clin Gastroenterol Hepatol* 2016;14(12):1720-31. doi: 10.1016/j.cgh.2016.04.026 [published Online First: 2016/04/27]
4. Ballou S, Keefer L. Psychological Interventions for Irritable Bowel Syndrome and Inflammatory Bowel Diseases. *Clin Transl Gastroenterol* 2017;8(1):e214. doi: 10.1038/ctg.2016.69 [published Online First: 2017/01/20]
5. Kavuri, Raghuram N, Malamud A, et al. Irritable Bowel Syndrome: Yoga as Remedial Therapy. *Evid Based Complement Alternat Med* 2015;2015:398156. doi: 10.1155/2015/398156 [published Online First: 2015/06/13]
6. Brems C, Colgan D, Freeman H, et al. Elements of yogic practice: Perceptions of students in healthcare programs. *International Journal of Yoga* 2016;9(2):121.
7. D'Silva A, MacQueen G, Nasser Y, et al. Yoga as a Therapy for Irritable Bowel Syndrome. *Dig Dis Sci* 2019 doi: 10.1007/s10620-019-05989-6 [published Online First: 2019/12/14]
8. Taneja I, Deepak KK, Poojary G, et al. Yogic versus conventional treatment in diarrhea-predominant irritable bowel syndrome: A randomized control study. *Applied Psychophysiology and Biofeedback* 2004;29(1):19-33.
9. Kavuri V, Selvan P, Malamud A, et al. Remedial yoga module remarkably improves symptoms in irritable bowel syndrome patients: A 12-week randomized controlled trial. *European Journal of Integrative Medicine* 2015;7(6):595-608. doi: 10.1016/j.eujim.2015.11.001
10. Shahabi L, Naliboff BD, Shapiro D. Self-regulation evaluation of therapeutic yoga and walking for patients with irritable bowel syndrome: a pilot study. *Psychol Health Med* 2016;21(2):176-88. doi: 10.1080/13548506.2015.1051557 [published Online First: 2015/06/19]
11. Schumann D, Langhorst J, Dobos G, et al. Randomised clinical trial: yoga vs a low-FODMAP diet in patients with irritable bowel syndrome. *Aliment Pharmacol Ther* 2018;47(2):203-11. doi: 10.1111/apt.14400 [published Online First: 2017/10/28]
12. Hanlon I, Hewitt C, Bell K, et al. Systematic review with meta-analysis: online psychological interventions for mental and physical health outcomes in gastrointestinal disorders including irritable bowel syndrome and inflammatory bowel disease. *Aliment Pharmacol Ther* 2018;48(3):244-59. doi: 10.1111/apt.14840 [published Online First: 2018/06/15]
13. Knowles SR, Mikocka-Walus A. Utilization and efficacy of internet-based eHealth technology in gastroenterology: a systematic review. *Scand J Gastroenterol* 2014;49(4):387-408. doi: 10.3109/00365521.2013.865259 [published Online First: 2014/02/06]
14. Helsel BC, Williams JE, Lawson K, et al. Telemedicine and Mobile Health Technology Are Effective in the Management of Digestive Diseases: A Systematic Review. *Dig Dis Sci* 2018;63(6):1392-408. doi: 10.1007/s10620-018-5054-z [published Online First: 2018/04/18]
15. Dorn SD, Palsson OS, Woldeghebriel M, et al. Development and pilot testing of an integrated, web-based self-management program for irritable bowel syndrome (IBS). *Neurogastroenterol Motil* 2015;27(1):128-34. doi: 10.1111/nmo.12487 [published Online First: 2014/12/09]
16. Everitt H, Moss-Morris R, Sibelli A, Tapp L, Coleman N, Yardley L, Smith P, Little P. Management of irritable bowel syndrome in primary care: the results of an exploratory randomised controlled



## MEDITATION AND YOGA FOR IBS

- 1  
2  
3 trial of mebeverine, methylcellulose, placebo and a self-management website. *BMC*  
4 *Gastroenterol* 2012;13(68):1-13. doi: <http://www.biomedcentral.com/1471-230X/13/68>  
5  
6 17. Hunt MG, Moshier S, Milonova M. Brief cognitive-behavioral internet therapy for irritable bowel  
7 syndrome. *Behav Res Ther* 2009;47(9):797-802. doi: 10.1016/j.brat.2009.05.002 [published  
8 Online First: 2009/07/03]  
9  
10 18. Ljotsson B, Andersson G, Andersson E, et al. Acceptability, effectiveness, and cost-effectiveness of  
11 internet-based exposure treatment for irritable bowel syndrome in a clinical sample: a  
12 randomized controlled trial. *BMC Gastroenterol* 2011;11:110. doi: 10.1186/1471-230X-11-110  
13 [published Online First: 2011/10/14]  
14  
15 19. Ljotsson B, Falk L, Vesterlund AW, et al. Internet-delivered exposure and mindfulness based therapy  
16 for irritable bowel syndrome--a randomized controlled trial. *Behav Res Ther* 2010;48(6):531-9.  
17 doi: 10.1016/j.brat.2010.03.003 [published Online First: 2010/04/07]  
18  
19 20. Kaur S, D'Silva A, Rajagopalan V, et al. Evaluation of an integrated yoga program in patients with  
20 inflammatory bowel disease: A pilot study. *Explore (NY)* 2021 doi:  
21 10.1016/j.explore.2021.04.006 [published Online First: 2021/07/03]  
22  
23 21. Francis CY, Morris J, Whorwell PJ. The irritable bowel syndrome scoring system: A simple method of  
24 monitoring irritable bowel syndrome and its progress. *Aliment Pharmacol Ther* 1997;11:395-  
25 402.  
26  
27 22. Hennink MM, Kaiser BN, Marconi VC. Code Saturation Versus Meaning Saturation: How Many  
28 Interviews Are Enough? *Qual Health Res* 2017;27(4):591-608. doi: 10.1177/1049732316665344  
29 [published Online First: 2016/09/28]  
30  
31 23. Braun VC, V. Using thematic analysis in psychology. *Qualitative Research in Psychology* 2006;3:77-  
32 101.  
33  
34 24. Braun VC, V. Can I use TA? Should I use TA? Should I not use TA? Comparing reflexive thematic  
35 analysis and other pattern-based qualitative analytic approaches. *Couns Psychother Res*  
36 2021;21:37-47.  
37  
38 25. Kendzerska T, Zhu DT, Gershon AS, et al. The Effects of the Health System Response to the COVID-19  
39 Pandemic on Chronic Disease Management: A Narrative Review. *Risk Manag Healthc Policy*  
40 2021;14:575-84. doi: 10.2147/RMHP.S293471 [published Online First: 2021/02/25]  
41  
42 26. Kamp KJ, Levy RL, Munson SA, et al. Impact of COVID-19 on Individuals With Irritable Bowel  
43 Syndrome and Comorbid Anxiety and/or Depression. *J Clin Gastroenterol* 2021 doi:  
44 10.1097/MCG.0000000000001515 [published Online First: 2021/03/30]  
45  
46 27. Oshima T, Siah KTH, Yoshimoto T, et al. Impacts of the COVID2019 pandemic on functional dyspepsia  
47 and irritable bowel syndrome: A population-based survey. *J Gastroenterol Hepatol* 2020 doi:  
48 10.1111/jgh.15346 [published Online First: 2020/11/17]  
49  
50 28. Sabate JM, Deutsch D, Melchior C, et al. COVID-19 pandemic and lockdown stress consequences in  
51 people with and without Irritable Bowel Syndrome. *Ethics Med Public Health* 2021;18:100660.  
52 doi: 10.1016/j.jemep.2021.100660 [published Online First: 2021/06/22]  
53  
54 29. Moher D, Hopewell S, Schulz KF, et al. CONSORT 2010 Explanation and Elaboration: Updated  
55 guidelines for reporting parallel group randomised trials. *J Clin Epidemiol* 2010;63(8):e1-37. doi:  
56 10.1016/j.jclinepi.2010.03.004 [published Online First: 2010/03/30]  
57  
58 30. Erdrich S, Hawrelak JA, Myers SP, et al. A systematic review of the association between fibromyalgia  
59 and functional gastrointestinal disorders. *Therap Adv Gastroenterol*  
60 2020;13:1756284820977402. doi: 10.1177/1756284820977402 [published Online First:  
2020/12/22]  
31. Vasudev SJ. Benefits of Yoga Namaskar 2021 [Available from: <https://isha.sadhguru.org/ca/en/yoga-meditation/yoga-program-for-beginners/yoga-for-overall-wellbeing2021>.]

## MEDITATION AND YOGA FOR IBS

- 1  
2  
3  
4  
5  
6  
7  
8  
9  
10  
11  
12  
13  
14  
15  
16  
17  
18  
19  
20  
21  
22  
23  
24  
25  
26  
27  
28  
29  
30  
31  
32  
33  
34  
35  
36  
37  
38  
39  
40  
41  
42  
43  
44  
45  
46  
47  
48  
49  
50  
51  
52  
53  
54  
55  
56  
57  
58  
59  
60
32. Chandrasekeran A, Rajesh SK., Srinivasan TM. Effect of repetitive yogic squats with specific hand position (Thoppukaranam) on selective attention and psychological states. *International Journal of Yoga* 2014;7(1):76-79. doi: 10.4103/0973-6131.123497
33. Cramer H, Lauche R, Klose P, et al. Yoga for schizophrenia: a systematic review and meta-analysis. *BMC Psychiatry* 2013;13:32. doi: 10.1186/1471-244X-13-32 [published Online First: 2013/01/18]
34. Saraswati S. M S, S.S. Hatha yoga Pradipika. Munger, India, Bihar: Bihar School of Yoga 1985.
35. Naik GS, Gaur GS, Pal GK. Effect of Modified Slow Breathing Exercise on Perceived Stress and Basal Cardiovascular Parameters. *Int J Yoga* 2018;11(1):53-58. doi: 10.4103/ijoy.IJOY\_41\_16
36. Telles S, Vishwakarma B, Gupta RK, et al. Changes in Shape and Size Discrimination and State Anxiety After Alternate-Nostril Yoga Breathing and Breath Awareness in One Session Each. *Med Sci Monit Basic Res* 2019;25:121-27. doi: 10.12659/MSMBR.914956 [published Online First: 2019/04/22]
37. Telles S, Nagarathna R, Nagendra HR. Autonomic changes during "OM" meditation. *Indian J Physiol Pharmacol* 1995;39(4):418-20.
38. Rao NP, Deshpande G, Gangadhar KB, et al. Directional brain networks underlying OM chanting. *Asian J Psychiatr* 2018;37:20-25. doi: 10.1016/j.ajp.2018.08.001 [published Online First: 2018/08/03]
39. Arch JJ, Craske MG. Mechanisms of mindfulness: emotion regulation following a focused breathing induction. *Behav Res Ther* 2006;44(12):1849-58. doi: 10.1016/j.brat.2005.12.007 [published Online First: 2006/02/07]

MEDITATION AND YOGA FOR IBS

1  
2  
3  
4  
5  
6  
7  
8  
9  
10  
11  
12  
13  
14  
15  
16  
17  
18  
19  
20  
21  
22  
23  
24  
25  
26  
27  
28  
29  
30  
31  
32  
33  
34  
35  
36  
37  
38  
39  
40  
41  
42  
43  
44  
45  
46  
47  
48  
49  
50  
51  
52  
53  
54  
55  
56  
57  
58  
59  
60

For peer review only

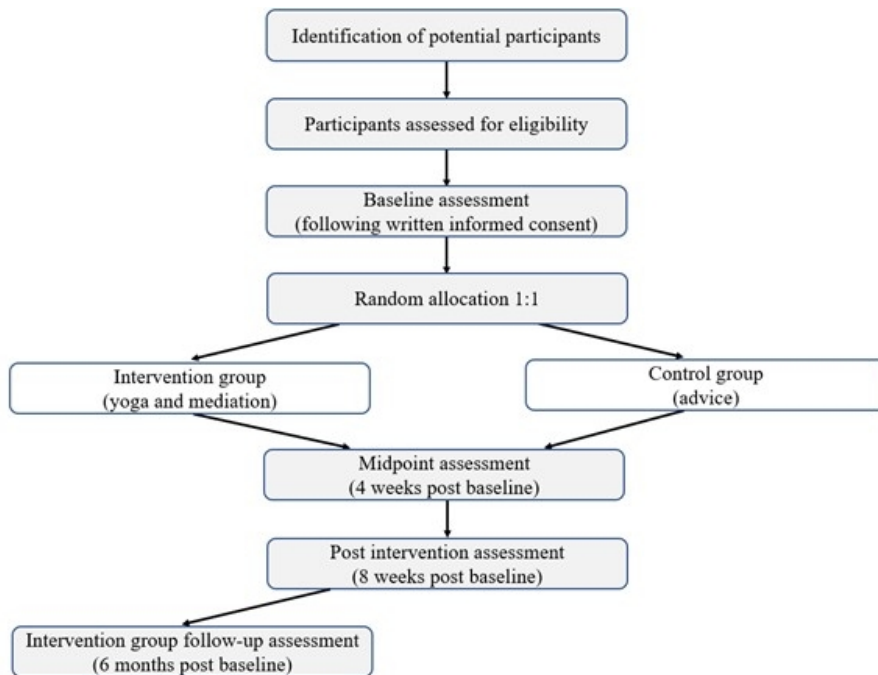

169x114mm (96 x 96 DPI)

Supplementary Table 1. Effectiveness outcomes measures.

| Measure                                     | Description                                                                                                                                                                                                                                                                                                                                                                                                                                                                                                                                                 | Scoring                                                                                                                                                                                                                                                                                                                                                                                                                                                                                                      | Assessments |         |         |
|---------------------------------------------|-------------------------------------------------------------------------------------------------------------------------------------------------------------------------------------------------------------------------------------------------------------------------------------------------------------------------------------------------------------------------------------------------------------------------------------------------------------------------------------------------------------------------------------------------------------|--------------------------------------------------------------------------------------------------------------------------------------------------------------------------------------------------------------------------------------------------------------------------------------------------------------------------------------------------------------------------------------------------------------------------------------------------------------------------------------------------------------|-------------|---------|---------|
|                                             |                                                                                                                                                                                                                                                                                                                                                                                                                                                                                                                                                             |                                                                                                                                                                                                                                                                                                                                                                                                                                                                                                              | Baseline    | 4 weeks | 8 weeks |
| <b>Primary outcome</b>                      |                                                                                                                                                                                                                                                                                                                                                                                                                                                                                                                                                             |                                                                                                                                                                                                                                                                                                                                                                                                                                                                                                              |             |         |         |
| <i>IBS-Symptom Severity Scale (IBS-SSS)</i> | The IBS-SSS is a five-question survey that asks the severity of abdominal pain, frequency of abdominal pain, severity of abdominal distention, dissatisfaction with bowel habits, and interference with QOL over the past 10 days. Subjects respond to each question on a 100-point visual analogue scale <sup>22</sup> . The IBS-SSS scale is the most frequently used severity measure for evaluating IBS severity and is commonly used as an outcome measure in clinical trials because it is highly responsive to change with treatment <sup>22</sup> . | Scores on the IBS-SSS range from 0 to 500 with higher scores indicating more severe symptoms. Participants can be categorized as having mild (75-175), moderate (175-300), or severe (>300) IBS.<br><br>Symptom reduction of at least 50 points is considered clinically meaningful; however, the primary endpoint will be the proportion of participants in each group who demonstrate a symptom reduction of 83 points or more, based on the variables used in the sample size calculation <sup>22</sup> . | ✓           | ✓       | ✓       |
| <b>Secondary outcomes</b>                   |                                                                                                                                                                                                                                                                                                                                                                                                                                                                                                                                                             |                                                                                                                                                                                                                                                                                                                                                                                                                                                                                                              |             |         |         |
| <i>IBS-Quality of life (IBS-QOL)</i>        | The IBS-QOL is a 34-item questionnaire that assesses the degree to which IBS interfered with QOL over the past 30 days. Each item is rated on a 1 to 5 Likert scale, with higher values indicating a lower QOL <sup>25</sup> . The IBS-QOL is currently the most validated and highly responsive self-reported QOL measure specific to IBS that can be used to assess the impact of IBS and its treatment <sup>25</sup> .                                                                                                                                   | The individual responses to the 34 items are summed and averaged for a total score and then transformed to a 0-100 scale for ease of interpretation with higher scores indicating better IBS specific QOL <sup>25</sup> .<br><br>An increment of at least 14 points on the IBS-QOL scale from baseline will demonstrate efficacy.                                                                                                                                                                            | ✓           | ✓       | ✓       |
| <i>Generalized Anxiety Disorder (GAD-7)</i> | GAD-7 is seven items, score from 0 (not at all) to 3 (nearly every day), providing a severity score between 0-21. Scores of 5, 10, and 15 represent cut points for                                                                                                                                                                                                                                                                                                                                                                                          | A 5-point change on the GAD-7 is considered clinically significant.                                                                                                                                                                                                                                                                                                                                                                                                                                          | ✓           | ✓       | ✓       |

|                                              |                                                                                                                                                                                                                                                                                                                                              |                                                                         |   |   |   |
|----------------------------------------------|----------------------------------------------------------------------------------------------------------------------------------------------------------------------------------------------------------------------------------------------------------------------------------------------------------------------------------------------|-------------------------------------------------------------------------|---|---|---|
|                                              | mild, moderate, and severe anxiety. The GAD-7 also is effective at identifying the presence of other anxiety disorders including panic disorder, social anxiety disorder, and post-traumatic stress disorder <sup>26</sup> .                                                                                                                 |                                                                         |   |   |   |
| <i>Physical Health Questionnaire (PHQ-9)</i> | The PHQ-9 is a 9-item survey with each item scored from 0 (not at all) to 3 (nearly every day) totalling from 0 to 27 points. Scores of 5, 10, 15, and 20 represent cut points for mild, moderate, moderately severe and severe depression. The PHQ assesses major depressive disorder, panic disorder, and anxiety disorder <sup>27</sup> . | A 5-point change is considered clinically significant.                  | ✓ | ✓ | ✓ |
| <i>Perceived Stress Scale (PSS)</i>          | The PSS is a 14-item survey that measures perceived stress, or the degree to which situations in one's life are appraised as stressful, on a four-point scale (0=never, 4=very often) over the last 30 days. The PSS is the most widely used psychological instrument for measuring the perception of stress <sup>29</sup> .                 | An 11-point change is considered clinically significant <sup>28</sup> . | ✓ | ✓ | ✓ |
| <i>COVID-19 Stress Scales (CSS)</i>          | COVID-19 related stress and anxiety will be measured using the 36-item CSS survey on five scales: (1) COVID danger and contamination fears, (2) COVID fears about economic consequences, (3) COVID xenophobia, (4) COVID compulsive checking and reassurance seeking, and (5) COVID traumatic stress symptoms <sup>33</sup> .                | Not reported.                                                           | ✓ | ✓ | ✓ |
| <i>Modified Fatigue Impact Scale-21.</i>     | This is a self-reported questionnaire consisting of 21 statements that reflect the perceived impact of fatigue on cognitive, physical, and psychosocial                                                                                                                                                                                      | A 16-point change is considered clinically significant <sup>30</sup> .  | ✓ | ✓ | ✓ |

1  
2  
3  
4  
5  
6  
7  
8  
9  
10  
11  
12  
13  
14  
15  
16  
17  
18  
19  
20  
21  
22  
23  
24  
25  
26  
27  
28  
29  
30  
31  
32  
33  
34  
35  
36  
37  
38  
39  
40  
41  
42  
43  
44  
45  
46  
47

|                                                    |                                                                                                                                                                                                                                                                                                                                                                                       |                                                                                                                                                                                                                                                                                                              |   |   |   |
|----------------------------------------------------|---------------------------------------------------------------------------------------------------------------------------------------------------------------------------------------------------------------------------------------------------------------------------------------------------------------------------------------------------------------------------------------|--------------------------------------------------------------------------------------------------------------------------------------------------------------------------------------------------------------------------------------------------------------------------------------------------------------|---|---|---|
|                                                    | functioning. Participants are asked to rate the extent to which fatigue has caused problems for them during the last four weeks. Each item is rated on a 5-point scale reflecting how often the person is limited in activities by fatigue, ranging from 0 (never) to 4 (almost always) <sup>31</sup> .                                                                               |                                                                                                                                                                                                                                                                                                              |   |   |   |
| <i>Patient Health Questionnaire-15 (PHQ-15)</i>    | The PHQ-15 measures the severity of 15 somatic symptoms (e.g., fatigue, energy, sleeping trouble, and pain) during the past 4 weeks for a score of 0 to 30. Items can be scored as 0 (not at all), 1 (bothered a little), or 2 (bothered a lot). PHQ-15 scores of 5, 10, and 15 represent cut points for low, medium, and high somatic symptom severity, respectively <sup>32</sup> . | A 5-point change on the PHQ-15 is considered clinically significant.                                                                                                                                                                                                                                         | ✓ | ✓ | ✓ |
| <i>Self-Compassion Scale – Short Form (SCS-SF)</i> | Participants will be asked to complete a 12-item self-reported scale measuring their self-compassion, including self-kindness, self-judgement, humanity, isolation, and mindfulness subscales.<br><br>To encourage their practice and feelings of self-compassion, participants will receive self-compassion messages weekly by email.                                                | Subscale scores are computed by calculating the mean of subscale items responses. Participants will indicate how often they behave in the stated manner, using a scale from 1 (almost never) to 5 (almost always) for a total of 60 points with lower scores indicating more self-compassion <sup>34</sup> . | ✓ | ✓ | ✓ |

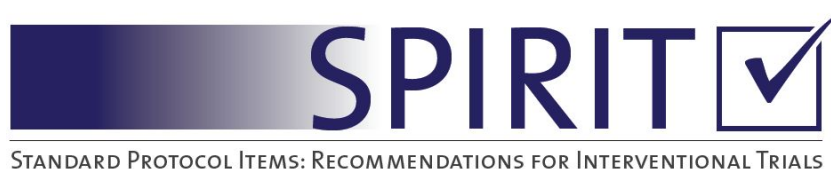

STANDARD PROTOCOL ITEMS: RECOMMENDATIONS FOR INTERVENTIONAL TRIALS

SPIRIT 2013 Checklist: Recommended items to address in a clinical trial protocol and related documents\*

| Section/item                      | Item No | Description                                                                                                                                                                                                                                                                                           |
|-----------------------------------|---------|-------------------------------------------------------------------------------------------------------------------------------------------------------------------------------------------------------------------------------------------------------------------------------------------------------|
| <b>Administrative information</b> |         |                                                                                                                                                                                                                                                                                                       |
| Title                             | 1       | Descriptive title identifying the study design, population, interventions, and, if applicable, trial acronym <b>(PG 1)</b>                                                                                                                                                                            |
| Trial registration                | 2a      | Trial identifier and registry name. If not yet registered, name of intended registry <b>(PG 3)</b>                                                                                                                                                                                                    |
|                                   | 2b      | All items from the World Health Organization Trial Registration Data Set <b>(N/A)</b>                                                                                                                                                                                                                 |
| Protocol version                  | 3       | Date and version identifier <b>(N/A)</b>                                                                                                                                                                                                                                                              |
| Funding                           | 4       | Sources and types of financial, material, and other support <b>(PG 20)</b>                                                                                                                                                                                                                            |
| Roles and responsibilities        | 5a      | Names, affiliations, and roles of protocol contributors <b>(PG 1, 2, 20)</b>                                                                                                                                                                                                                          |
|                                   | 5b      | Name and contact information for the trial sponsor <b>(N/A)</b>                                                                                                                                                                                                                                       |
|                                   | 5c      | Role of study sponsor and funders, if any, in study design; collection, management, analysis, and interpretation of data; writing of the report; and the decision to submit the report for publication, including whether they will have ultimate authority over any of these activities <b>(N/A)</b> |
|                                   | 5d      | Composition, roles, and responsibilities of the coordinating centre, steering committee, endpoint adjudication committee, data management team, and other individuals or groups overseeing the trial, if applicable (see Item 21a for data monitoring committee) <b>(N/A)</b>                         |
| <b>Introduction</b>               |         |                                                                                                                                                                                                                                                                                                       |
| Background and rationale          | 6a      | Description of research question and justification for undertaking the trial, including summary of relevant studies (published and unpublished), examining benefits and harms for each intervention <b>(PG 4, 5)</b>                                                                                  |
|                                   | 6b      | Explanation for choice of comparators <b>(PG 7, 8)</b>                                                                                                                                                                                                                                                |
| Objectives                        | 7       | Specific objectives or hypotheses <b>(PG 5)</b>                                                                                                                                                                                                                                                       |
| Trial design                      | 8       | Description of trial design including type of trial (eg, parallel group, crossover, factorial, single group), allocation ratio, and framework (eg, superiority, equivalence, noninferiority, exploratory) <b>(PG 5)</b>                                                                               |



## Methods: Participants, interventions, and outcomes

|                      |     |                                                                                                                                                                                                                                                                                                                                                                                                     |
|----------------------|-----|-----------------------------------------------------------------------------------------------------------------------------------------------------------------------------------------------------------------------------------------------------------------------------------------------------------------------------------------------------------------------------------------------------|
| Study setting        | 9   | Description of study settings (eg, community clinic, academic hospital) and list of countries where data will be collected. Reference to where list of study sites can be obtained <b>(PG 6)</b>                                                                                                                                                                                                    |
| Eligibility criteria | 10  | Inclusion and exclusion criteria for participants. If applicable, eligibility criteria for study centres and individuals who will perform the interventions (eg, surgeons, psychotherapists) <b>(PG 6)</b>                                                                                                                                                                                          |
| Interventions        | 11a | Interventions for each group with sufficient detail to allow replication, including how and when they will be administered <b>(PG 7, 8)</b>                                                                                                                                                                                                                                                         |
|                      | 11b | Criteria for discontinuing or modifying allocated interventions for a given trial participant (eg, drug dose change in response to harms, participant request, or improving/worsening disease) <b>(PG 7)</b>                                                                                                                                                                                        |
|                      | 11c | Strategies to improve adherence to intervention protocols, and any procedures for monitoring adherence (eg, drug tablet return, laboratory tests) <b>(PG 7, 8)</b>                                                                                                                                                                                                                                  |
|                      | 11d | Relevant concomitant care and interventions that are permitted or prohibited during the trial <b>(N/A)</b>                                                                                                                                                                                                                                                                                          |
| Outcomes             | 12  | Primary, secondary, and other outcomes, including the specific measurement variable (eg, systolic blood pressure), analysis metric (eg, change from baseline, final value, time to event), method of aggregation (eg, median, proportion), and time point for each outcome. Explanation of the clinical relevance of chosen efficacy and harm outcomes is strongly recommended <b>(PG 8, 9, 10)</b> |
| Participant timeline | 13  | Time schedule of enrolment, interventions (including any run-ins and washouts), assessments, and visits for participants. A schematic diagram is highly recommended (see Figure) <b>(PG 7, 8, 9. Please see supplementary material Table 1.)</b>                                                                                                                                                    |
| Sample size          | 14  | Estimated number of participants needed to achieve study objectives and how it was determined, including clinical and statistical assumptions supporting any sample size calculations <b>(PG 10)</b>                                                                                                                                                                                                |
| Recruitment          | 15  | Strategies for achieving adequate participant enrolment to reach target sample size <b>(PG 6, 7)</b>                                                                                                                                                                                                                                                                                                |

## Methods: Assignment of interventions (for controlled trials)

Allocation:

|    |                |     |                                                                         |
|----|----------------|-----|-------------------------------------------------------------------------|
| 1  |                |     |                                                                         |
| 2  | Sequence       | 16a | Method of generating the allocation sequence (eg, computer-             |
| 3  | generation     |     | generated random numbers), and list of any factors for stratification.  |
| 4  |                |     | To reduce predictability of a random sequence, details of any planned   |
| 5  |                |     | restriction (eg, blocking) should be provided in a separate document    |
| 6  |                |     | that is unavailable to those who enrol participants or assign           |
| 7  |                |     | interventions <b>(PG 11)</b>                                            |
| 8  |                |     |                                                                         |
| 9  |                |     |                                                                         |
| 10 | Allocation     | 16b | Mechanism of implementing the allocation sequence (eg, central          |
| 11 | concealment    |     | telephone; sequentially numbered, opaque, sealed envelopes),            |
| 12 | mechanism      |     | describing any steps to conceal the sequence until interventions are    |
| 13 |                |     | assigned <b>(PG 11)</b>                                                 |
| 14 |                |     |                                                                         |
| 15 | Implementation | 16c | Who will generate the allocation sequence, who will enrol participants, |
| 16 |                |     | and who will assign participants to interventions <b>(PG 11)</b>        |
| 17 |                |     |                                                                         |
| 18 |                |     |                                                                         |
| 19 | Blinding       | 17a | Who will be blinded after assignment to interventions (eg, trial        |
| 20 | (masking)      |     | participants, care providers, outcome assessors, data analysts), and    |
| 21 |                |     | how <b>(PG 11)</b>                                                      |
| 22 |                |     |                                                                         |
| 23 |                | 17b | If blinded, circumstances under which unblinding is permissible, and    |
| 24 |                |     | procedure for revealing a participant's allocated intervention during   |
| 25 |                |     | the trial <b>(N/A)</b>                                                  |
| 26 |                |     |                                                                         |
| 27 |                |     |                                                                         |

### Methods: Data collection, management, and analysis

|    |                 |     |                                                                               |
|----|-----------------|-----|-------------------------------------------------------------------------------|
| 28 |                 |     |                                                                               |
| 29 |                 |     |                                                                               |
| 30 | Data collection | 18a | Plans for assessment and collection of outcome, baseline, and other           |
| 31 | methods         |     | trial data, including any related processes to promote data quality (eg,      |
| 32 |                 |     | duplicate measurements, training of assessors) and a description of           |
| 33 |                 |     | study instruments (eg, questionnaires, laboratory tests) along with           |
| 34 |                 |     | their reliability and validity, if known. Reference to where data             |
| 35 |                 |     | collection forms can be found, if not in the protocol <b>(PG 8, 9. Please</b> |
| 36 |                 |     | <b>see supplementary material Table 1.)</b>                                   |
| 37 |                 |     |                                                                               |
| 38 |                 |     |                                                                               |
| 39 |                 | 18b | Plans to promote participant retention and complete follow-up,                |
| 40 |                 |     | including list of any outcome data to be collected for participants who       |
| 41 |                 |     | discontinue or deviate from intervention protocols <b>(Please see</b>         |
| 42 |                 |     | <b>supplementary material Table 1.)</b>                                       |
| 43 |                 |     |                                                                               |
| 44 |                 |     |                                                                               |
| 45 | Data            | 19  | Plans for data entry, coding, security, and storage, including any            |
| 46 | management      |     | related processes to promote data quality (eg, double data entry;             |
| 47 |                 |     | range checks for data values). Reference to where details of data             |
| 48 |                 |     | management procedures can be found, if not in the protocol <b>(PG 11)</b>     |
| 49 |                 |     |                                                                               |
| 50 |                 |     |                                                                               |
| 51 | Statistical     | 20a | Statistical methods for analysing primary and secondary outcomes.             |
| 52 | methods         |     | Reference to where other details of the statistical analysis plan can be      |
| 53 |                 |     | found, if not in the protocol <b>(PG 11, 12)</b>                              |
| 54 |                 |     |                                                                               |
| 55 |                 | 20b | Methods for any additional analyses (eg, subgroup and adjusted                |
| 56 |                 |     | analyses) <b>(PG 11, 12)</b>                                                  |
| 57 |                 |     |                                                                               |
| 58 |                 |     |                                                                               |
| 59 |                 |     |                                                                               |
| 60 |                 |     |                                                                               |

- 1  
2  
3  
4  
5  
6  
7  
8  
9  
10  
11  
12  
13  
14  
15  
16  
17  
18  
19  
20  
21  
22  
23  
24  
25  
26  
27  
28  
29  
30  
31  
32  
33  
34  
35  
36  
37  
38  
39  
40  
41  
42  
43  
44  
45  
46  
47  
48  
49  
50  
51  
52  
53  
54  
55  
56  
57  
58  
59  
60
- 20c Definition of analysis population relating to protocol non-adherence (eg, as randomised analysis), and any statistical methods to handle missing data (eg, multiple imputation) **(PG 12)**

### Methods: Monitoring

- Data monitoring 21a Composition of data monitoring committee (DMC); summary of its role and reporting structure; statement of whether it is independent from the sponsor and competing interests; and reference to where further details about its charter can be found, if not in the protocol. Alternatively, an explanation of why a DMC is not needed **(N/A)**
- 21b Description of any interim analyses and stopping guidelines, including who will have access to these interim results and make the final decision to terminate the trial **(N/A)**
- Harms 22 Plans for collecting, assessing, reporting, and managing solicited and spontaneously reported adverse events and other unintended effects of trial interventions or trial conduct **(N/A)**
- Auditing 23 Frequency and procedures for auditing trial conduct, if any, and whether the process will be independent from investigators and the sponsor **(N/A)**

### Ethics and dissemination

- Research ethics approval 24 Plans for seeking research ethics committee/institutional review board (REC/IRB) approval **(PG 14)**
- Protocol amendments 25 Plans for communicating important protocol modifications (eg, changes to eligibility criteria, outcomes, analyses) to relevant parties (eg, investigators, REC/IRBs, trial participants, trial registries, journals, regulators) **(PG 14)**
- Consent or assent 26a Who will obtain informed consent or assent from potential trial participants or authorised surrogates, and how (see Item 32) **(PG 14)**
- 26b Additional consent provisions for collection and use of participant data and biological specimens in ancillary studies, if applicable **(N/A)**
- Confidentiality 27 How personal information about potential and enrolled participants will be collected, shared, and maintained in order to protect confidentiality before, during, and after the trial **(PG 11)**
- Declaration of interests 28 Financial and other competing interests for principal investigators for the overall trial and each study site **(PG 20)**
- Access to data 29 Statement of who will have access to the final trial dataset, and disclosure of contractual agreements that limit such access for investigators **(PG 20)**

|    |                   |     |                                                                                |
|----|-------------------|-----|--------------------------------------------------------------------------------|
| 1  |                   |     |                                                                                |
| 2  | Ancillary and     | 30  | Provisions, if any, for ancillary and post-trial care, and for                 |
| 3  | post-trial care   |     | compensation to those who suffer harm from trial participation ( <b>Please</b> |
| 4  |                   |     | <b>see the study consent form.</b> )                                           |
| 5  |                   |     |                                                                                |
| 6  | Dissemination     | 31a | Plans for investigators and sponsor to communicate trial results to            |
| 7  | policy            |     | participants, healthcare professionals, the public, and other relevant         |
| 8  |                   |     | groups (eg, via publication, reporting in results databases, or other          |
| 9  |                   |     | data sharing arrangements), including any publication restrictions ( <b>pg</b> |
| 10 |                   |     | <b>14, 15</b> )                                                                |
| 11 |                   |     |                                                                                |
| 12 |                   | 31b | Authorship eligibility guidelines and any intended use of professional         |
| 13 |                   |     | writers ( <b>N/A</b> )                                                         |
| 14 |                   |     |                                                                                |
| 15 |                   | 31c | Plans, if any, for granting public access to the full protocol, participant-   |
| 16 |                   |     | level dataset, and statistical code ( <b>N/A</b> )                             |
| 17 |                   |     |                                                                                |
| 18 |                   |     |                                                                                |
| 19 |                   |     |                                                                                |
| 20 | <b>Appendices</b> |     |                                                                                |
| 21 |                   |     |                                                                                |
| 22 | Informed consent  | 32  | Model consent form and other related documentation given to                    |
| 23 | materials         |     | participants and authorised surrogates ( <b>Please see the study</b>           |
| 24 |                   |     | <b>consent form.</b> )                                                         |
| 25 |                   |     |                                                                                |
| 26 | Biological        | 33  | Plans for collection, laboratory evaluation, and storage of biological         |
| 27 | specimens         |     | specimens for genetic or molecular analysis in the current trial and for       |
| 28 |                   |     | future use in ancillary studies, if applicable ( <b>N/A</b> )                  |
| 29 |                   |     |                                                                                |

---

30 \*It is strongly recommended that this checklist be read in conjunction with the SPIRIT 2013

31 Explanation & Elaboration for important clarification on the items. Amendments to the

32 protocol should be tracked and dated. The SPIRIT checklist is copyrighted by the SPIRIT

33 Group under the Creative Commons "[Attribution-NonCommercial-NoDerivs 3.0 Unported](https://creativecommons.org/licenses/by-nc-nd/3.0/)"

34 license.

35

36

37

38

39

40

41

42

43

44

45

46

47

48

49

50

51

52

53

54

55

56

57

58

59

60

# BMJ Open

## Meditation and Yoga for Irritable Bowel Syndrome: Study Protocol for a Randomized Clinical Trial (MY-IBS Study)

|                                 |                                                                                                                                                                                                                                                                                                                                                                                                                                                                                                                                             |
|---------------------------------|---------------------------------------------------------------------------------------------------------------------------------------------------------------------------------------------------------------------------------------------------------------------------------------------------------------------------------------------------------------------------------------------------------------------------------------------------------------------------------------------------------------------------------------------|
| Journal:                        | <i>BMJ Open</i>                                                                                                                                                                                                                                                                                                                                                                                                                                                                                                                             |
| Manuscript ID                   | bmjopen-2021-059604.R1                                                                                                                                                                                                                                                                                                                                                                                                                                                                                                                      |
| Article Type:                   | Protocol                                                                                                                                                                                                                                                                                                                                                                                                                                                                                                                                    |
| Date Submitted by the Author:   | 06-Apr-2022                                                                                                                                                                                                                                                                                                                                                                                                                                                                                                                                 |
| Complete List of Authors:       | D'Silva, Adrijana; University of Calgary, Department of Community Health Sciences<br>Marshall, Deborah; University of Calgary, Department of Community Health Sciences<br>Vallance, Jeffrey; Athabasca University<br>Nasser, Yasmin; University of Calgary, Department of Medicine; University of Calgary, Department of Medicine<br>Rajagopalan, Vidya; University of Calgary, Department of Medicine<br>MacKean, Gail; University of Calgary, Department of Community Health Sciences<br>Raman, Maitreyi; University of Calgary, Medicine |
| <b>Primary Subject Heading</b>: | Gastroenterology and hepatology                                                                                                                                                                                                                                                                                                                                                                                                                                                                                                             |
| Secondary Subject Heading:      | Complementary medicine, Mental health, Sports and exercise medicine                                                                                                                                                                                                                                                                                                                                                                                                                                                                         |
| Keywords:                       | Clinical trials < THERAPEUTICS, Functional bowel disorders < GASTROENTEROLOGY, MENTAL HEALTH                                                                                                                                                                                                                                                                                                                                                                                                                                                |
|                                 |                                                                                                                                                                                                                                                                                                                                                                                                                                                                                                                                             |

SCHOLARONE™  
Manuscripts

## MEDITATION AND YOGA FOR IBS

**Meditation and Yoga for Irritable Bowel Syndrome:****Study Protocol for a Randomized Clinical Trial (MY-IBS Study)**

Adrijana D'Silva, MHS<sup>1</sup>, Deborah A Marshall, PhD<sup>1,2</sup>, Jeff K. Vallance, PhD<sup>3</sup>, Yasmin Nasser, MD, PhD<sup>4,5</sup>, Vidya Rajagopalan, MHA<sup>4</sup>, Gail MacKean<sup>1</sup>, PhD, Maitreyi Raman, MD<sup>4</sup>

<sup>1</sup>Department of Community Health Sciences, Cumming School of Medicine, University of Calgary, Calgary, Canada

<sup>2</sup>Arthur J.E. Child Chair, Department of Medicine, Cumming School of Medicine, University of Calgary

<sup>3</sup>Faculty of Health Disciplines, Athabasca University, Athabasca, Canada

<sup>4</sup>Division of Gastroenterology and Hepatology, Department of Medicine, Cumming School of Medicine, University of Calgary

<sup>5</sup>Snyder Institute for Chronic Disease, Cumming School of Medicine, University of Calgary

Adrijana D'Silva

[adrijana.dsilva@ucalgary.ca](mailto:adrijana.dsilva@ucalgary.ca)

3280 Hospital Drive NW, Calgary, Alberta, T2N 4Z6

Deborah A Marshall

[damarsha@ucalgary.ca](mailto:damarsha@ucalgary.ca)

3280 Hospital Drive NW, Calgary, Alberta, T2N 4Z6

Jeff K. Vallance

[jeffv@athabascau.ca](mailto:jeffv@athabascau.ca)

1 University Drive, Athabasca, Alberta, T9S 3A3

Yasmin Nasser

[ynasser@ucalgary.ca](mailto:ynasser@ucalgary.ca)

3330 Hospital Drive NW Calgary, AB T2N 4N1

Vidya Rajagopalan

[vidya.rajagopalan@ucalgary.ca](mailto:vidya.rajagopalan@ucalgary.ca)

3280 Hospital Drive NW, Calgary, Alberta, T2N 4Z6

Gail MacKean

[glmackea@ucalgary.ca](mailto:glmackea@ucalgary.ca)

3280 Hospital Drive NW, Calgary, Alberta, T2N 4Z6

## MEDITATION AND YOGA FOR IBS

1  
2  
3  
4 Maitreyi Raman

5 [mkothand@ucalgary.ca](mailto:mkothand@ucalgary.ca)

6 3280 Hospital Drive NW, Calgary, Alberta, T2N 4Z6  
7  
8

9 Corresponding Author:

10 Dr. Maitreyi Raman

11 6D33 TRW Building

12 3280 Hospital Drive NW

13 Calgary, AB, T2N 4N1, Canada

14 Email: [mkothand@ucalgary.ca](mailto:mkothand@ucalgary.ca)  
15  
16  
17  
18  
19  
20  
21  
22  
23  
24  
25  
26  
27  
28  
29  
30  
31  
32  
33  
34  
35  
36  
37  
38  
39  
40  
41  
42  
43  
44  
45  
46  
47  
48  
49  
50  
51  
52  
53  
54  
55  
56  
57  
58  
59  
60

## MEDITATION AND YOGA FOR IBS

**Abstract**

**Introduction:** When delivered in person, yoga has been shown to be effective in managing Irritable Bowel Syndrome (IBS) symptoms. Research is needed to test the feasibility and effectiveness of yoga as a therapeutic option when delivered virtually. The primary aim of the Mind and Yoga for IBS (MY-IBS) randomized controlled trial is to determine the effects of an eight-week virtual meditation and yoga intervention on IBS symptom severity compared with an advice-only active control group.

**Methods and analysis:** Adults diagnosed with IBS will be randomized to receive either a Upa yoga intervention or an advice-only control group. The intervention will consist of weekly online classes for eight weeks delivered by a facilitator using Microsoft Office Teams and daily home practice. Feasibility will be evaluated by examining recruitment and attrition rates, adherence, participant satisfaction with the program, and safety. The primary outcome is IBS symptom severity, and key secondary outcomes include (but not limited to) quality of life, anxiety and depression symptoms, COVID-19 related stress and anxiety, and fatigue. Outcomes will be assessed at baseline, four weeks, and eight weeks. An embedded design experimental model sub-study will be conducted post-intervention using qualitative research methods to identify participants' experiences in the yoga program.

**Ethics and dissemination:** This study has been approved by the Conjoint Health Research Ethics Board (REB ID 20-0084). Findings will be disseminated through peer-reviewed publication, conference presentation, and social media.

**Trial registration number:** NCT04302623

**Strengths and limitations:**

- Mixed methods study composed of a RCT and interviews
- First virtual yoga interventions in irritable bowel syndrome
- Canada-wide recruitment
- Self-reported outcome measures
- Lack of data capture on the frequency of yoga practice in the control group



## MEDITATION AND YOGA FOR IBS

**Introduction**

Stress is a physical, mental, or emotional response that causes tension in the mind or the body<sup>1</sup>. Altered stress response from psychological and physiological mechanisms may contribute to altered brain-gut signaling patterns and IBS symptoms. Psychological stressors, such as depression and anxiety, may influence gut function (e.g., reduced motility). Physiological stressors (e.g., infection) in the gut may affect the brain<sup>2</sup>. Therapies focusing on mind-body interactions and stress reduction may be adjunctive treatments for IBS. Stress management techniques that include both mind and body interventions such as yoga<sup>3</sup> have been effective in improving IBS symptom severity and mental health outcomes<sup>3 4</sup>. Mind-body interventions may modulate the brain-gut axis directly by reducing sympathetic activity and increasing parasympathetic activity and the hypothalamus-pituitary-adrenal axis<sup>5</sup>.

Yoga is a traditional *mind-body-breath* discipline that includes a triad of postures, structured breathing, and meditation<sup>6</sup>. Our recent review<sup>7</sup> identified four randomized controlled trials that examined traditional yoga practice as therapy for IBS patients<sup>8-11</sup>. These trials demonstrated yoga was more effective compared to pharmacological treatment and equally effective as dietary interventions or moderate-intensity walking. Physical and mental health improvements included IBS symptom severity, gastric motility, and depression.

Research is needed to determine the feasibility and effectiveness of virtual yoga programming as a therapeutic option for patients with IBS. The rationale for virtually delivered interventions to manage IBS is increasing due to rising demand, limited healthcare resources, and cost-effectiveness<sup>12 13</sup>. A recent review found virtual care tools may be effective in managing disease activity and improving outcomes in patients with digestive diseases<sup>14</sup>. This review also highlighted the high acceptability and satisfaction with virtual care among patients with IBS<sup>15-19</sup>.

## MEDITATION AND YOGA FOR IBS

The primary objective of the MY-IBS (Meditation and Yoga for Irritable Bowel Syndrome) study is to explore the feasibility and effectiveness of a virtual yoga program for patients with IBS. MY-IBS is a mixed-methods study including a randomized controlled trial and semi-structured interviews. The primary aim of this randomized controlled trial is to determine the effects of an eight-week virtual yoga intervention on IBS symptom severity, measured with the IBS Symptoms Severity Scale, compared to an advice-only control group. Secondary aims are to determine whether a) a yoga program delivered virtually is feasible for adults with IBS, b) improves health outcomes including quality of life, stress, and fatigue, and c) improves mental health outcomes including depression and anxiety symptoms. An embedded design experimental model qualitative sub-study using semi-structured interviews will explore and describe participants' experiences in the yoga program, and its impact. We hypothesize that the program will be feasible and effective in improving outcomes in the intervention group compared to the control group.

### Methods and Analysis

#### Study design overview

The quantitative study is a superiority randomized non-blinded two-group controlled trial. The qualitative study will use semi-structured interviews and thematic analysis to explore and describe intervention participant experiences and views of the yoga program.

#### Patient involvement

## MEDITATION AND YOGA FOR IBS

1  
2  
3 Patients with lived experience were involved in the conduct of this study. During the  
4 development stage, patient partners were invited to participate in a series of discussions with the  
5 research team to define the study research question, study design, choice of outcome measures,  
6 and methods of recruitment. Following the completion of the trial, the patient partners will be  
7 involved in the dissemination of this research.  
8  
9  
10  
11  
12  
13

### **Sample and selection**

14  
15  
16  
17 The MY-IBS stud will be conducted at the University of Calgary in Alberta, Canada  
18 starting March 2021 and ending early 2022. To be eligible in this study, participants must be  
19 diagnosed with IBS based on Rome IV criteria by a health care professional (e.g., physician,  
20 nurse, dietician), be 18-70 years old, have an adequate understanding of English, have an ability  
21 to provide written informed consent, score at least 75 out 500 points on the IBS Symptoms  
22 Severity Scale indicating mild IBS symptoms, and be on stable doses of medications for IBS  
23 (including anti-depressants) without major changes to diet or physical activity levels for at least  
24 eight weeks prior to starting the intervention. Individuals across Canada are eligible to  
25 participate. Exclusion criteria include a major physical impairment that would prevent the  
26 individual from doing yoga determined by either the patient or the study coordinator, and  
27 diagnosis of any major cognitive, psychological, or psychiatric disorder (e.g., major depression,  
28 schizophrenia) as identified by the treating physician or healthcare practitioner or screened by  
29 the study coordinator using the Patient Health Questionnaire-9.  
30  
31  
32  
33  
34  
35  
36  
37  
38  
39  
40  
41  
42  
43  
44  
45  
46

47 Participants will be identified through (a) gastroenterology clinics across Calgary,  
48 Alberta; (b) gastroenterologists across Canada who indicated interest in this study for their IBS  
49 patients in a previous survey conducted by our team (not published); (c) participants from the  
50 previous survey who indicated interest in this study and have given consent to be contacted; (d)  
51  
52  
53  
54  
55  
56  
57

## MEDITATION AND YOGA FOR IBS

1  
2  
3 through social media; (e) self-referrals through the study website and the University of Calgary  
4 participate in research portal; (f) Canadian Association of Gastroenterologists monthly  
5 newsletter; and (g) participants with IBS who are enrolled in the IMAGINE (Inflammation,  
6  
7 Microbiome and Alimentation Gastro-intestinal and Neuropsychiatric Effects) cohort study at the  
8 University of Calgary and have given their consent to be contacted for future studies.  
9  
10  
11  
12  
13

14  
15 Participant screening will use the Patient Health Questionnaire-9 (PHQ-9). Individuals  
16 who score 20 points or higher on the PHQ-9 indicating severe depression will not be eligible to  
17 participate. Reasons for exclusion are lack of compliance in interventional studies among these  
18 individuals, potential heterogeneity in the small sample size of participants, and skewed results if  
19 patients seek treatment for their depression during the trial.  
20  
21  
22  
23  
24  
25

### **Interventions**

#### **Yoga intervention group**

26  
27  
28  
29  
30  
31 Before their first class, the intervention group will receive an introductory video. The  
32 video will consist of information on IBS, information on the style of yoga they will be learning,  
33 and rationale for yoga as a treatment for IBS. The intervention will be delivered online by a  
34 certified yoga facilitator in class sizes of less than ten participants using the Microsoft Office  
35 Teams platform. Classes will be held once per week for the eight-week duration. The first  
36 session will be approximately 90 minutes and subsequent sessions up to 60 minutes. The  
37 introductory session will include the class setup, introductions, teaching poses, corrections, and  
38 a question and answers period. The yoga facilitator will provide participants with modifications  
39 for common challenges to support best practices and ensure safety. Subsequent classes will  
40 include a review from the previous week, a question and answer period, individual corrections  
41 and modifications, and introduce new practices. In addition to the online class component, study  
42  
43  
44  
45  
46  
47  
48  
49  
50  
51  
52  
53  
54  
55  
56  
57  
58  
59  
60

## MEDITATION AND YOGA FOR IBS

1  
2  
3 staff will ask participants to practice the yoga program at home every day. They will also have  
4  
5 access to the yoga videos, written program instructions, and frequently answered questions  
6  
7 accessible through the study website to help support their home practice  
8  
9  
10 (<https://cumming.ucalgary.ca/research/ascend/resources/patient-resources/my-ibs>).

11  
12 Upa Yoga, developed by the Isha Foundation of Inner Sciences  
13  
14 (<https://isha.sadhguru.org/us/en>), will be promoted. Upa Yoga maintains the ancient principles  
15  
16 of Hatha Yoga and will be delivered by a certified yoga facilitator from the Isha Foundation.  
17  
18 The Upa Yoga program will consist of (a) directional movements and neck rotations, (b) hatha  
19  
20 yoga-based Yoga Namaskar, (c) breathing practices or alternate nostril breathing, (d) mantra  
21  
22 meditation consisting of AUM chanting (OM), and e) breath watching. Table 1 shows a  
23  
24 description of the program and rationale. Our published prospective study examining the  
25  
26 effectiveness of Upa Yoga in patients with Inflammatory Bowel Disease<sup>20</sup> shows improvements  
27  
28 in mental health scores after an eight-week yoga program.  
29  
30  
31

### **Advice-only control group**

32  
33  
34  
35 Control participants will receive a video including general education on IBS, the mind-  
36  
37 gut connection in IBS, and the role of mind-body therapies in the management of IBS. These  
38  
39 participants will also receive a list of IBS-related resources from the Canadian Digestive Health  
40  
41 Foundation, a link to an IBS patient support group ([www.ibspatient.org](http://www.ibspatient.org)), and information about  
42  
43 physical activity guidelines from the World Health Organization. Control participants will be  
44  
45 eligible to attend a two-week yoga program and receive the yoga videos eight weeks from the  
46  
47 time of enrolment. Data on these participants will not be collected as this participation option is  
48  
49 for participants who desire to receive the yoga sessions outside of the study.  
50  
51  
52

### **Outcome measures**

## MEDITATION AND YOGA FOR IBS

**Feasibility outcomes**

*Recruitment, attendance, and attrition rates.* Recruitment will be calculated by the percentage of participants who complete the eligibility and enrollment phases of the study. Attrition will be calculated by the percentage of participants who complete all study measures at baseline and eight weeks. A feasible intervention will be defined as class attendance of at least 75 percent (i.e., attendance in six out of eight classes)<sup>9</sup> and attrition rate of less than 30 percent.

*Adherence.* Adherence will be defined as practicing daily yoga for at least 80% of days for eight weeks (or 45 out of 56 days minimum). Each week a practice log will be provided to monitor frequency and length of yoga. The yoga facilitator will take attendance during each online class. To increase program adherence, the study coordinator will email intervention participants weekly. Six months following the completion of the intervention, participants will be asked to report the average frequency (i.e., days per month) and duration (i.e., minutes) of their yoga practices over the last seven days to evaluate long-term maintenance.

*Program satisfaction.* Intervention participants will complete a survey regarding overall satisfaction with their program, including satisfaction with videos and online class instruction. Videos and online classes will be deemed acceptable if at least 70% of participants are at least satisfied (i.e., rank classes as either good, great, or excellent). Participants will also indicate whether they would recommend the program to others on a scale from 1 (strongly disagree) to 7 (strongly agree) and provide feedback on how the program could be improved.

*Assessment of harms.* The study coordinator will screen potential participants and exclude those with any physical problems that may limit participation with yoga postures. Participants will be asked to report any adverse events experienced during the study period.

## MEDITATION AND YOGA FOR IBS

Participants with adverse events (e.g., injury resulting from the program) will be advised to consult their physician to provide care as appropriate.

**Effectiveness outcomes**

The primary outcome, IBS symptoms, will be measured using the *IBS-Symptom Severity Scale (IBS-SSS)*. The IBS-SSS is a five-question survey that asks the severity of abdominal pain, frequency of abdominal pain, severity of abdominal distention, dissatisfaction with bowel habits, and interference with QOL over the past 10 days. Scores on the IBS-SSS range from 0 to 500 with higher scores indicating more severe symptoms. Participants can be categorized as having mild (75-175), moderate (175-300), or severe (>300) IBS. Symptom reduction of at least 50 points is considered clinically meaningful.

Secondary outcomes (*and their measures*) include quality of life (*IBS-Quality of life*), anxiety (*Generalized Anxiety Disorder-7*), depression (*Patient Health Questionnaire-9*), stress (*Perceived Stress Scale*), COVID-19 stress (*COVID-19 Stress Scale*), fatigue (*Modified Fatigue Impact Scale-21*), somatic Symptoms (*Patient Health Questionnaire-15*), and self-compassion (*Self Compassion Scale-Short Form*) (Supplementary Table 1). Intention to practice yoga will also be assessed. The intervention and control groups will be assessed on effectiveness outcomes

## MEDITATION AND YOGA FOR IBS

at baseline, four, and eight weeks. The intervention group will complete measures of effectiveness outcomes six months after the intervention.

### **Sample size**

We will recruit twenty-five participants per group. However, assuming 30% attrition rate, we will aim to recruit 33 participants per group. Symptom reduction of at least 50 points is considered clinically meaningful, however a group difference has been shown to represent a considerable self-reported improvement<sup>21</sup>. We calculated the sample size using a mean difference of at least 83 points on the IBS-SSS ( $\alpha=0.05$ ,  $\beta=0.80$ , standard deviation of 103.8)<sup>9</sup>.

### **Randomization, treatment allocation, and blinding**

Study flow is shown in Figure 1. The study coordinator will obtain consent from participants who will then be enrolled in the study. Participants will be randomized after baseline assessment to either the yoga intervention or the advice-only control group. A statistician blinded to the randomization key will create a computer-generated REDCap randomized sequence to allocate participants based on gender (1:1:1 male:female:other) and depression (1:1 depression:no depression). Participants will be aware of the group to which they are allocated, however, the principal investigator and data analyst will remain blinded to the randomization process.

### **Data management**

All quantitative data will be entered into a secure REDCap database at the University of Calgary. Effectiveness outcome measures, program satisfaction, attendance, and adherence will be entered by the participants. Recruitment, attrition, and safety will be recorded by the study coordinator who is not blinded to the randomization. After the study, data will be downloaded, and patient identifiers will be removed from the data file. Data will be stored in a password-



## MEDITATION AND YOGA FOR IBS

protected file on a University of Calgary password protected computer. The interviews will be transcribed, deidentified, and uploaded to the University of Calgary's secure SharePoint site.

Only the research team will have access to the data.

### **Statistical analysis**

Descriptive analysis will summarize participant characteristics and feasibility outcomes. Univariate analysis of variance (ANOVA) will examine baseline differences between groups for variables with continuous data. Chi-square tests will examine baseline differences between groups for categorical variables. Unadjusted ANOVA and adjusted analysis of covariance (ANCOVA) models will compare differences in scores from baseline and post-intervention data within and between groups using intent to treat and per protocol analysis. A logistic regression – model examining determinants of responders (a minimum improvement of at least 50 points on the IBS-SSS scale) versus non-responders will be developed to predict a response to the intervention. This model will consider practice in minutes, baseline depression, anxiety, and IBS symptom severity scores. An  $\alpha$  of 0.05 will be the threshold for determining statistical significance. If the frequency of missing data is >5%, we will perform additional analyses using imputation methods. Analysis will be conducted using SPSS version 26.

### **Post-intervention interviews**

Participants who were randomized to the intervention and did not withdraw from the study will be invited by email to participate in an interview. We aim to recruit men and women and have equal representation of those who benefited from the program (i.e., experienced improvements in their IBS symptom severity) as well as individuals who did not. We anticipate needing to interview between 10 and 15 participants to reach both code and meaning saturation<sup>22</sup> aiming for a maximum variation sample.

## MEDITATION AND YOGA FOR IBS

1  
2  
3           Semi-structured interviews will capture participants' experiences, program satisfaction,  
4  
5 facilitators and barriers to participation, perceptions of social support and supervised learning,  
6  
7 perceived impact on IBS symptoms and overall physical and mental health, and input on  
8  
9 improving future programming (Table 2). Interviews will happen virtually using Microsoft  
10  
11 Office Teams and be approximately 30 to 45 minutes in length. The study coordinator will  
12  
13 interview the participants, take notes during the interview, and reflect following each interview.  
14  
15 Interview recordings will be transcribed verbatim without identifying information. Data will be  
16  
17 coded and analyzed in duplicate using NVivo 12. Thematic analysis inductively reveals patterns  
18  
19 and themes providing an understanding of participant experiences, with the program and their  
20  
21 perspectives on its impact. Thematic analysis is a method for systematically identifying,  
22  
23 organizing, and offering insight into patterns of meaning (themes) across a data set <sup>23</sup>. This  
24  
25 method makes sense of shared meanings and experiences that allows the researcher to identify  
26  
27 what data is important to the research question <sup>24</sup>.  
28  
29  
30  
31  
32  
33  
34

### Discussion

35  
36  
37           The MY-IBS study aims to determine the feasibility and effectiveness of an eight-week  
38  
39 virtual yoga and meditation program combined with home-based practice for patients with IBS.  
40  
41 Determining feasibility will be based on study recruitment, adherence, safety, and program  
42  
43 satisfaction. Improved IBS symptom management (the primary outcome) will determine  
44  
45 intervention effectiveness. Secondary outcomes include quality of life, stress, fatigue,  
46  
47 depression, anxiety, COVID-19-related stress and anxiety, and self-compassion. These findings  
48  
49 will inform potential predictors of responders versus non-responders. Predictors may be  
50  
51 considered in clinical practice to target the IBS patients most likely to benefit from the yoga  
52  
53  
54  
55  
56  
57  
58  
59  
60

## MEDITATION AND YOGA FOR IBS

1  
2  
3 intervention. Interview themes and patterns will refine and inform the development of future  
4  
5 virtual yoga programming designed for IBS patients.  
6

7  
8 To our knowledge, there are no studies of virtual yoga and meditation in the IBS  
9  
10 population. The findings from this study may have implications for the management of IBS. The  
11  
12 virtual delivery of yoga represents an opportunity to increase access to effective management  
13  
14 therapies for patients with IBS. The COVID-19 pandemic has called for the reorganization of  
15  
16 health care including utilization of virtual care. Nearly 90% of care in the United States has been  
17  
18 delivered virtually since the pandemic<sup>25</sup>. Due to the COVID-19 pandemic, there is increased  
19  
20 psychological distress and gastrointestinal symptoms among individuals with IBS<sup>26 27</sup> compared  
21  
22 to individuals without IBS<sup>28</sup>. The present study offers a unique opportunity to examine  
23  
24 prospectively the feasibility and effectiveness of a yoga and meditation program delivered  
25  
26 virtually to individuals living with IBS with the COVID-19 pandemic restrictions taken into  
27  
28 consideration. Study findings may aid in developing interventions and services tailored to  
29  
30 patients with IBS. New insight into outcomes will be beneficial for healthcare leaders in  
31  
32 planning how to allocate existing resources to support these services and potentially lessen the  
33  
34 burden of IBS on both the individual and the health care system.  
35  
36  
37  
38  
39  
40  
41

### **Ethics and dissemination**

#### **Ethics**

42  
43  
44 The study protocol, informed consent form, and other study documents were reviewed  
45  
46 and approved by the University of Calgary's ethics board. All protocol modifications will be  
47  
48 submitted for review and approval by the ethics board. The trial participants will be informed of  
49  
50 any modifications, and re-consented by the study coordinator, if required. Further, the trial  
51  
52 registry for this study will be updated.  
53  
54  
55  
56  
57

## MEDITATION AND YOGA FOR IBS

1  
2  
3 Participation is voluntary and will not influence standard clinical care. All participants  
4 will provide informed written consent and have the right to withdraw from the study at any time.  
5  
6 Pending consent from the participant, all data collected up to the time of withdrawal will be used  
7  
8 in the final data analyses as advised by the CONSORT guidelines <sup>29</sup>.  
9  
10

### **Dissemination**

11  
12  
13  
14 Our targeted knowledge users and audiences will include researchers, healthcare  
15 professionals and service providers, persons with lived experiences, community groups, and  
16 professional organizations (e.g., Canadian Association of Gastroenterology). Our goal will be to  
17 increase topic area knowledge among these groups and inform future research. Our strategies  
18 will include conference presentations, publication in a peer reviewed journal, social media  
19 campaigns, development of virtually delivered tools such as mobile applications to increase  
20 accessibility and affordability and educational material distributed through the Digestive Health  
21 Foundation, IMAGINE SPOR Chronic Disease Network, and Primary Care Networks across  
22 Alberta.  
23  
24  
25  
26  
27  
28  
29  
30  
31  
32  
33  
34  
35  
36  
37  
38  
39  
40  
41  
42  
43  
44  
45  
46  
47  
48  
49  
50  
51  
52  
53  
54  
55  
56  
57  
58  
59  
60

## MEDITATION AND YOGA FOR IBS

Table 1. Overview of the Upa Yoga program.

| Program Component                       | Description                                                                                                                                                                                                   | Rationale                                                                                                                                                                                                                                                                                                                                                                                                                                                                                                                                             |
|-----------------------------------------|---------------------------------------------------------------------------------------------------------------------------------------------------------------------------------------------------------------|-------------------------------------------------------------------------------------------------------------------------------------------------------------------------------------------------------------------------------------------------------------------------------------------------------------------------------------------------------------------------------------------------------------------------------------------------------------------------------------------------------------------------------------------------------|
| <i>Directional Movement of the Arms</i> | This practice involves extending the arms in four directions (sideways, front, up and down) by rotating the wrists, while consciously focusing on the inhalation and exhalation of breath with each movement. | Studies show that fibromyalgia is common among patients living with IBS <sup>30</sup> . This could lead to pain of the muscles and joints, fatigue, and sleep concerns. The principle behind this practice is to lubricate the fluids in the joints, increase circulation and activate the energy nodes in these joints. Doing these practices everyday can relieve muscle and joint stiffness and reduce pain over time. This practice is recommended by the Isha Foundation to increase strengths and flexibility in preparation for Yoga Namaskar. |
| <i>Neck Practices</i>                   | There are five sets of neck practices, each stretching the neck and final one working on the shoulder area.                                                                                                   | The main cause of neck pain is usually muscle tension. Perceived stress can increase muscle tension. These neck exercises help relieve stress that can aggravate IBS symptoms. This practice is recommended by the Isha Foundation to increase strengths and flexibility in preparation for Yoga Namaskar.                                                                                                                                                                                                                                            |
| <i>Yoga Namaskar</i>                    | This practice involves a series of seven consecutive steps of upper body stretching and squatting, aligned with breath.                                                                                       | This practice activates the lumbar region of the spine and strengthens the spinal muscles <sup>31</sup> . While Yoga Namaskar has not been specifically studied in patients with IBS, yoga squatting postures have been associated with significant decrease in depression among nine individuals with IBD <sup>20</sup> and anxiety in a randomized self as control study in 30 healthy subjects <sup>32</sup> .                                                                                                                                     |
| <i>Alternate Nostril</i>                | The participant sits cross-legged with the spine comfortably erect and eyes closed. Closing the right nostril with the thumb,                                                                                 | Alternate nostril breathing is traditionally considered to alleviate mental unrest and                                                                                                                                                                                                                                                                                                                                                                                                                                                                |

## MEDITATION AND YOGA FOR IBS

|                                         |                                                                                                                                                                                                                                                                                                                                                                                     |                                                                                                                                                                                                                                                                                                        |
|-----------------------------------------|-------------------------------------------------------------------------------------------------------------------------------------------------------------------------------------------------------------------------------------------------------------------------------------------------------------------------------------------------------------------------------------|--------------------------------------------------------------------------------------------------------------------------------------------------------------------------------------------------------------------------------------------------------------------------------------------------------|
| <i>Breathing (Nadi Shuddhi)</i>         | inhaling and exhaling through the left nostril. This is repeated on the right nostril by closing the left nostril with the ring finger.                                                                                                                                                                                                                                             | promote physical and mental balance. <sup>33 34</sup> It has been demonstrated to decrease perceived stress and improve autonomic function in a randomized control trial compared to control subjects in healthy male volunteers, and decreased state anxiety in a prospective study. <sup>35 36</sup> |
| <i>Mantra Meditation (AUM chanting)</i> | The participants sit cross-legged, and with eyes closed, uttering each of these 3 sounds 7 times. The important aspect to this utterance is the awareness of the reverberations each of the sounds produces in the corresponding parts of the body: a - below the navel, o - mid-point of the chest, m - pit of the throat.                                                         | This mantra is thought to facilitate energy flow, and through vibratory mechanisms, creates peace and harmony leading to increased mental alertness and may improve symptoms of depression. <sup>37 38</sup>                                                                                           |
| <i>Breath watching</i>                  | The participants sit cross-legged with eyes closed and hold a hand gesture called the Yoga Mudra (the tips of the thumb and index finger come together forming a circle). They are instructed to maintain a gentle focus on the mid-point between both eyebrows (at the level of the pineal gland), while being conscious of the gentle movement of breath happening in their body. | Breathing in a focused manner can be used as a tool to promote positive changes to the mind, body and emotions. <sup>39</sup> Significant reduction in the level of state anxiety was found in a group of healthy male volunteers when they practiced breath awareness. <sup>16</sup>                  |

## MEDITATION AND YOGA FOR IBS

Table 2. Semi-structured interview questions and probes.

1. **What have you done in the past to manage your IBS?**
  - a. Have you tried yoga or mediation?
  - b. Have you tried exercise?
2. **I would like to start by asking you what you were hoping for or expecting from the program?**
  - a. Why did you join this study?
  - b. Did anyone influence your decision to join?
  - c. Did that meet your expectations?
3. **Next, I would like to discuss your overall experience in the MY-IBS yoga program in which you participated. Could you describe for me what participating in this program was like for you?**
  - a. What did you like most about it?
  - b. What didn't you like?
  - c. Did this change over the course of the program?

**Sub-questions:** *yoga facilitator/supervision, the timing of sessions/scheduling, length of sessions, attending with other members, online experience versus in-person, social support/other participants.*

  - d. What was that like?
  - e. What stood out for you?
  - f. What emotions were you aware of at the time?
  - g. What else do you remember about that experience?
4. **How has participating in this program affected how you manage or live with your IBS?**

**Sub-questions:** *change in IBS symptoms; physical health, fatigue; mental health - stress, anxiety, depression; feeling better about myself; ability to live with my IBS.*

  - a. Tell me more about that.
  - b. Can you give me an example of what you mean?
  - c. How has that affected you?
5. **What, if anything, has helped you to do your practices at home?**

**Sub-questions:** *social support, family support, convenience*

  - a. Tell me more about that.
  - b. Can you give me an example of what you mean?
  - c. How has that affected you?
6. **What challenges did you have, if any, doing your practices at home?**

**Sub-questions:** *family, supervision/safety, schedule/time*

  - a. Are you satisfied with how you did?
  - b. Tell me more about that.

## MEDITATION AND YOGA FOR IBS

- 1  
2  
3 c. Can you give me an example of what you mean?  
4 d. How has that affected you?  
5  
6  
7 **7. What, if anything, has helped you to attend the weekly online class?**  
8 **Sub-questions:** *social support, family support, HCP support, yoga facilitator,*  
9 *supervision/safety, online classes, schedule/length*  
10 a. Tell me more about that.  
11 b. Can you give me an example of what you mean?  
12 c. How has that affected you?  
13  
14  
15  
16 **8. What challenges did you have, if any, to attend the weekly online class?**  
17 **Sub-questions:** *social support, family, yoga facilitator, supervision/safety, online*  
18 *classes, schedule, technical difficulties*  
19 a. Are you satisfied with how you did?  
20 b. Tell me more about that.  
21 c. Can you give me an example of what you mean?  
22 d. How has that affected you?  
23  
24  
25  
26  
27 **9. We are interested in any ideas you have about how we might make this program**  
28 **better. What could we do differently?**  
29 **Sub-questions:** *content, timing, facilitator, videos, website, delivery, other supports*  
30 a. Would you explain that further?  
31 b. Can you give me an example of what you mean?  
32  
33  
34 **10. Based on your experience with yoga, would you incorporate yoga to help manage**  
35 **your IBS? If so, how?**  
36  
37  
38 **11. Before we conclude, is this anything else you would like to say about your**  
39 **experience with this program, that we haven't had a chance to talk about yet?**  
40  
41  
42  
43  
44  
45  
46  
47  
48  
49  
50  
51  
52  
53  
54  
55  
56  
57  
58  
59  
60



## MEDITATION AND YOGA FOR IBS

**Strengths and limitations of this study:**

- Mixed methods study composed of a trial and interviews
- First virtual yoga intervention in Irritable Bowel Syndrome
- Canada-wide recruitment
- Self-reported outcome measures
- Lack of data capture on frequency of yoga practice in the control group

**Authors' contributions:** State how each author was involved in writing the protocol.

AD is involved in all aspects of protocol design and lead author of the manuscript. DM, JKV, YN, VR, and GM assisted with design of the protocol respective to their expertise. DM and GM assisted with the qualitative aspects of the protocol. JKV lead the statistical aspects of the protocol. YN provided their clinical expertise and patient recruitment through the clinic. VR provided their expertise in yoga therapy. MR is the senior author on the protocol and has guided the work of this research to support AD with their training. All authors reviewed the manuscript for study design and provided critical insight into manuscript content and approved the final version for submission.

**Funding statement:** This research received no specific grant from any funding agency in the public, commercial or not-for-profit sectors. DM receives partial salary support through the Arthur J.E. Child Chair.

**Competing interests statement:** None declared.

**Data availability:** Deidentified participant data will be made available upon reasonable request from the study principal investigator.

MEDITATION AND YOGA FOR IBS

1  
2  
3  
4  
5  
6  
7  
8  
9  
10  
11  
12  
13  
14  
15  
16  
17  
18  
19  
20  
21  
22  
23  
24  
25  
26  
27  
28  
29  
30  
31  
32  
33  
34  
35  
36  
37  
38  
39  
40  
41  
42  
43  
44  
45  
46  
47  
48  
49  
50  
51  
52  
53  
54  
55  
56  
57  
58  
59  
60

Figure 1. Participant flowchart based on the CONSORT guidelines.

For peer review only

## MEDITATION AND YOGA FOR IBS

## References

1. Crosswell AD, Lockwood KG. Best practices for stress measurement: How to measure psychological stress in health research. *Health Psychol Open* 2020;7(2):2055102920933072. doi: 10.1177/2055102920933072 [published Online First: 2020/07/25]
2. Mayer EA, Labus JS, Tillisch K, et al. Towards a systems view of IBS. *Nat Rev Gastroenterol Hepatol* 2015;12(10):592-605. doi: 10.1038/nrgastro.2015.121 [published Online First: 2015/08/26]
3. Schumann D, Anheyer D, Lauche R, et al. Effect of Yoga in the Therapy of Irritable Bowel Syndrome: A Systematic Review. *Clin Gastroenterol Hepatol* 2016;14(12):1720-31. doi: 10.1016/j.cgh.2016.04.026 [published Online First: 2016/04/27]
4. Ballou S, Keefer L. Psychological Interventions for Irritable Bowel Syndrome and Inflammatory Bowel Diseases. *Clin Transl Gastroenterol* 2017;8(1):e214. doi: 10.1038/ctg.2016.69 [published Online First: 2017/01/20]
5. Kavuri, Raghuram N, Malamud A, et al. Irritable Bowel Syndrome: Yoga as Remedial Therapy. *Evid Based Complement Alternat Med* 2015;2015:398156. doi: 10.1155/2015/398156 [published Online First: 2015/06/13]
6. Brems C, Colgan D, Freeman H, et al. Elements of yogic practice: Perceptions of students in healthcare programs. *International Journal of Yoga* 2016;9(2):121.
7. D'Silva A, MacQueen G, Nasser Y, et al. Yoga as a Therapy for Irritable Bowel Syndrome. *Dig Dis Sci* 2019 doi: 10.1007/s10620-019-05989-6 [published Online First: 2019/12/14]
8. Taneja I, Deepak KK, Poojary G, et al. Yogic versus conventional treatment in diarrhea-predominant irritable bowel syndrome: A randomized control study. *Applied Psychophysiology and Biofeedback* 2004;29(1):19-33.
9. Kavuri V, Selvan P, Malamud A, et al. Remedial yoga module remarkably improves symptoms in irritable bowel syndrome patients: A 12-week randomized controlled trial. *European Journal of Integrative Medicine* 2015;7(6):595-608. doi: 10.1016/j.eujim.2015.11.001
10. Shahabi L, Naliboff BD, Shapiro D. Self-regulation evaluation of therapeutic yoga and walking for patients with irritable bowel syndrome: a pilot study. *Psychol Health Med* 2016;21(2):176-88. doi: 10.1080/13548506.2015.1051557 [published Online First: 2015/06/19]
11. Schumann D, Langhorst J, Dobos G, et al. Randomised clinical trial: yoga vs a low-FODMAP diet in patients with irritable bowel syndrome. *Aliment Pharmacol Ther* 2018;47(2):203-11. doi: 10.1111/apt.14400 [published Online First: 2017/10/28]
12. Hanlon I, Hewitt C, Bell K, et al. Systematic review with meta-analysis: online psychological interventions for mental and physical health outcomes in gastrointestinal disorders including irritable bowel syndrome and inflammatory bowel disease. *Aliment Pharmacol Ther* 2018;48(3):244-59. doi: 10.1111/apt.14840 [published Online First: 2018/06/15]
13. Knowles SR, Mikocka-Walus A. Utilization and efficacy of internet-based eHealth technology in gastroenterology: a systematic review. *Scand J Gastroenterol* 2014;49(4):387-408. doi: 10.3109/00365521.2013.865259 [published Online First: 2014/02/06]
14. Helsel BC, Williams JE, Lawson K, et al. Telemedicine and Mobile Health Technology Are Effective in the Management of Digestive Diseases: A Systematic Review. *Dig Dis Sci* 2018;63(6):1392-408. doi: 10.1007/s10620-018-5054-z [published Online First: 2018/04/18]
15. Dorn SD, Palsson OS, Woldeghebriel M, et al. Development and pilot testing of an integrated, web-based self-management program for irritable bowel syndrome (IBS). *Neurogastroenterol Motil* 2015;27(1):128-34. doi: 10.1111/nmo.12487 [published Online First: 2014/12/09]
16. Everitt H, Moss-Morris R, Sibelli A, Tapp L, Coleman N, Yardley L, Smith P, Little P. Management of irritable bowel syndrome in primary care: the results of an exploratory randomised controlled

## MEDITATION AND YOGA FOR IBS

- 1  
2  
3 trial of mebeverine, methylcellulose, placebo and a self-management website. *BMC*  
4 *Gastroenterol* 2012;13(68):1-13. doi: <http://www.biomedcentral.com/1471-230X/13/68>  
5  
6 17. Hunt MG, Moshier S, Milonova M. Brief cognitive-behavioral internet therapy for irritable bowel  
7 syndrome. *Behav Res Ther* 2009;47(9):797-802. doi: 10.1016/j.brat.2009.05.002 [published  
8 Online First: 2009/07/03]  
9  
10 18. Ljotsson B, Andersson G, Andersson E, et al. Acceptability, effectiveness, and cost-effectiveness of  
11 internet-based exposure treatment for irritable bowel syndrome in a clinical sample: a  
12 randomized controlled trial. *BMC Gastroenterol* 2011;11:110. doi: 10.1186/1471-230X-11-110  
13 [published Online First: 2011/10/14]  
14  
15 19. Ljotsson B, Falk L, Vesterlund AW, et al. Internet-delivered exposure and mindfulness based therapy  
16 for irritable bowel syndrome--a randomized controlled trial. *Behav Res Ther* 2010;48(6):531-9.  
17 doi: 10.1016/j.brat.2010.03.003 [published Online First: 2010/04/07]  
18  
19 20. Kaur S, D'Silva A, Rajagopalan V, et al. Evaluation of an integrated yoga program in patients with  
20 inflammatory bowel disease: A pilot study. *Explore (NY)* 2021 doi:  
21 10.1016/j.explore.2021.04.006 [published Online First: 2021/07/03]  
22  
23 21. Francis CY, Morris J, Whorwell PJ. The irritable bowel syndrome scoring system: A simple method of  
24 monitoring irritable bowel syndrome and its progress. *Aliment Pharmacol Ther* 1997;11:395-  
25 402.  
26  
27 22. Hennink MM, Kaiser BN, Marconi VC. Code Saturation Versus Meaning Saturation: How Many  
28 Interviews Are Enough? *Qual Health Res* 2017;27(4):591-608. doi: 10.1177/1049732316665344  
29 [published Online First: 2016/09/28]  
30  
31 23. Braun VC, V. Using thematic analysis in psychology. *Qualitative Research in Psychology* 2006;3:77-  
32 101.  
33  
34 24. Braun VC, V. Can I use TA? Should I use TA? Should I not use TA? Comparing reflexive thematic  
35 analysis and other pattern-based qualitative analytic approaches. *Couns Psychother Res*  
36 2021;21:37-47.  
37  
38 25. Kendzerska T, Zhu DT, Gershon AS, et al. The Effects of the Health System Response to the COVID-19  
39 Pandemic on Chronic Disease Management: A Narrative Review. *Risk Manag Healthc Policy*  
40 2021;14:575-84. doi: 10.2147/RMHP.S293471 [published Online First: 2021/02/25]  
41  
42 26. Kamp KJ, Levy RL, Munson SA, et al. Impact of COVID-19 on Individuals With Irritable Bowel  
43 Syndrome and Comorbid Anxiety and/or Depression. *J Clin Gastroenterol* 2021 doi:  
44 10.1097/MCG.0000000000001515 [published Online First: 2021/03/30]  
45  
46 27. Oshima T, Siah KTH, Yoshimoto T, et al. Impacts of the COVID2019 pandemic on functional dyspepsia  
47 and irritable bowel syndrome: A population-based survey. *J Gastroenterol Hepatol* 2020 doi:  
48 10.1111/jgh.15346 [published Online First: 2020/11/17]  
49  
50 28. Sabate JM, Deutsch D, Melchior C, et al. COVID-19 pandemic and lockdown stress consequences in  
51 people with and without Irritable Bowel Syndrome. *Ethics Med Public Health* 2021;18:100660.  
52 doi: 10.1016/j.jemep.2021.100660 [published Online First: 2021/06/22]  
53  
54 29. Moher D, Hopewell S, Schulz KF, et al. CONSORT 2010 Explanation and Elaboration: Updated  
55 guidelines for reporting parallel group randomised trials. *J Clin Epidemiol* 2010;63(8):e1-37. doi:  
56 10.1016/j.jclinepi.2010.03.004 [published Online First: 2010/03/30]  
57  
58 30. Erdrich S, Hawrelak JA, Myers SP, et al. A systematic review of the association between fibromyalgia  
59 and functional gastrointestinal disorders. *Therap Adv Gastroenterol*  
60 2020;13:1756284820977402. doi: 10.1177/1756284820977402 [published Online First:  
2020/12/22]  
31. Vasudev SJ. Benefits of Yoga Namaskar 2021 [Available from: <https://isha.sadhguru.org/ca/en/yoga-meditation/yoga-program-for-beginners/yoga-for-overall-wellbeing2021>.]

## MEDITATION AND YOGA FOR IBS

- 1  
2  
3  
4  
5  
6  
7  
8  
9  
10  
11  
12  
13  
14  
15  
16  
17  
18  
19  
20  
21  
22  
23  
24  
25  
26  
27  
28  
29  
30  
31  
32  
33  
34  
35  
36  
37  
38  
39  
40  
41  
42  
43  
44  
45  
46  
47  
48  
49  
50  
51  
52  
53  
54  
55  
56  
57  
58  
59  
60
32. Chandrasekeran A, Rajesh SK., Srinivasan TM. Effect of repetitive yogic squats with specific hand position (Thoppukaranam) on selective attention and psychological states. *International Journal of Yoga* 2014;7(1):76-79. doi: 10.4103/0973-6131.123497
33. Cramer H, Lauche R, Klose P, et al. Yoga for schizophrenia: a systematic review and meta-analysis. *BMC Psychiatry* 2013;13:32. doi: 10.1186/1471-244X-13-32 [published Online First: 2013/01/18]
34. Saraswati S. M S, S.S. Hatha yoga Pradipika. Munger, India, Bihar: Bihar School of Yoga 1985.
35. Naik GS, Gaur GS, Pal GK. Effect of Modified Slow Breathing Exercise on Perceived Stress and Basal Cardiovascular Parameters. *Int J Yoga* 2018;11(1):53-58. doi: 10.4103/ijoy.IJOY\_41\_16
36. Telles S, Vishwakarma B, Gupta RK, et al. Changes in Shape and Size Discrimination and State Anxiety After Alternate-Nostril Yoga Breathing and Breath Awareness in One Session Each. *Med Sci Monit Basic Res* 2019;25:121-27. doi: 10.12659/MSMBR.914956 [published Online First: 2019/04/22]
37. Telles S, Nagarathna R, Nagendra HR. Autonomic changes during "OM" meditation. *Indian J Physiol Pharmacol* 1995;39(4):418-20.
38. Rao NP, Deshpande G, Gangadhar KB, et al. Directional brain networks underlying OM chanting. *Asian J Psychiatr* 2018;37:20-25. doi: 10.1016/j.ajp.2018.08.001 [published Online First: 2018/08/03]
39. Arch JJ, Craske MG. Mechanisms of mindfulness: emotion regulation following a focused breathing induction. *Behav Res Ther* 2006;44(12):1849-58. doi: 10.1016/j.brat.2005.12.007 [published Online First: 2006/02/07]

1  
2  
3  
4  
5  
6  
7  
8  
9  
10  
11  
12  
13  
14  
15  
16  
17  
18  
19  
20  
21  
22  
23  
24  
25  
26  
27  
28  
29  
30  
31  
32  
33  
34  
35  
36  
37  
38  
39  
40  
41  
42  
43  
44  
45  
46  
47  
48  
49  
50  
51  
52  
53  
54  
55  
56  
57  
58  
59  
60

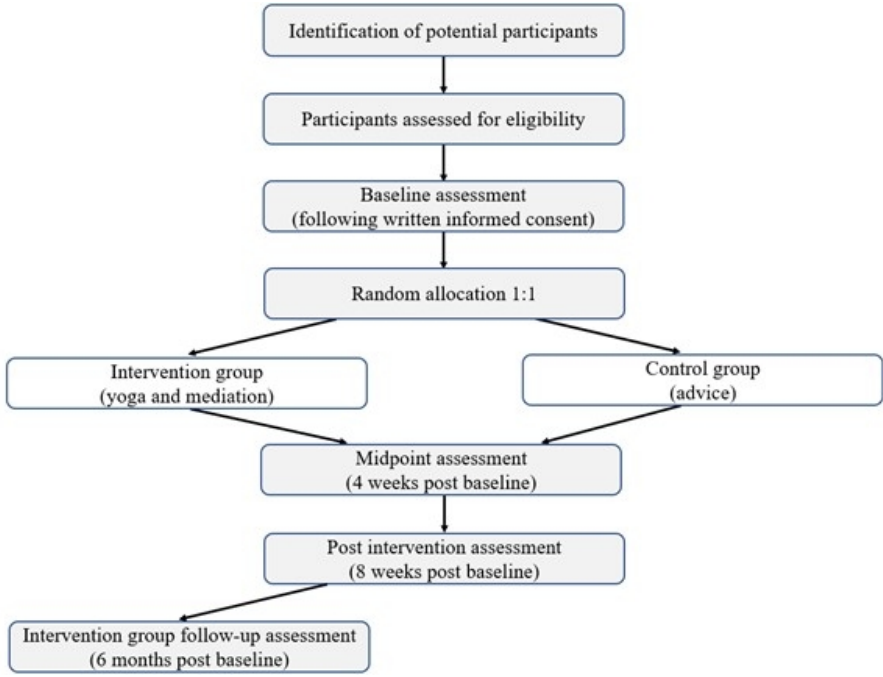

169x114mm (96 x 96 DPI)

Supplementary Table 1. Effectiveness outcomes measures.

| Measure                                     | Description                                                                                                                                                                                                                                                                                                                                                                                                                                                                                                                                                 | Scoring                                                                                                                                                                                                                                                                                                                                                                                                                                                                                                      | Assessments |         |         |
|---------------------------------------------|-------------------------------------------------------------------------------------------------------------------------------------------------------------------------------------------------------------------------------------------------------------------------------------------------------------------------------------------------------------------------------------------------------------------------------------------------------------------------------------------------------------------------------------------------------------|--------------------------------------------------------------------------------------------------------------------------------------------------------------------------------------------------------------------------------------------------------------------------------------------------------------------------------------------------------------------------------------------------------------------------------------------------------------------------------------------------------------|-------------|---------|---------|
|                                             |                                                                                                                                                                                                                                                                                                                                                                                                                                                                                                                                                             |                                                                                                                                                                                                                                                                                                                                                                                                                                                                                                              | Baseline    | 4 weeks | 8 weeks |
| <b>Primary outcome</b>                      |                                                                                                                                                                                                                                                                                                                                                                                                                                                                                                                                                             |                                                                                                                                                                                                                                                                                                                                                                                                                                                                                                              |             |         |         |
| <i>IBS-Symptom Severity Scale (IBS-SSS)</i> | The IBS-SSS is a five-question survey that asks the severity of abdominal pain, frequency of abdominal pain, severity of abdominal distention, dissatisfaction with bowel habits, and interference with QOL over the past 10 days. Subjects respond to each question on a 100-point visual analogue scale <sup>22</sup> . The IBS-SSS scale is the most frequently used severity measure for evaluating IBS severity and is commonly used as an outcome measure in clinical trials because it is highly responsive to change with treatment <sup>22</sup> . | Scores on the IBS-SSS range from 0 to 500 with higher scores indicating more severe symptoms. Participants can be categorized as having mild (75-175), moderate (175-300), or severe (>300) IBS.<br><br>Symptom reduction of at least 50 points is considered clinically meaningful; however, the primary endpoint will be the proportion of participants in each group who demonstrate a symptom reduction of 83 points or more, based on the variables used in the sample size calculation <sup>22</sup> . | ✓           | ✓       | ✓       |
| <b>Secondary outcomes</b>                   |                                                                                                                                                                                                                                                                                                                                                                                                                                                                                                                                                             |                                                                                                                                                                                                                                                                                                                                                                                                                                                                                                              |             |         |         |
| <i>IBS-Quality of life (IBS-QOL)</i>        | The IBS-QOL is a 34-item questionnaire that assesses the degree to which IBS interfered with QOL over the past 30 days. Each item is rated on a 1 to 5 Likert scale, with higher values indicating a lower QOL <sup>25</sup> . The IBS-QOL is currently the most validated and highly responsive self-reported QOL measure specific to IBS that can be used to assess the impact of IBS and its treatment <sup>25</sup> .                                                                                                                                   | The individual responses to the 34 items are summed and averaged for a total score and then transformed to a 0-100 scale for ease of interpretation with higher scores indicating better IBS specific QOL <sup>25</sup> .<br><br>An increment of at least 14 points on the IBS-QOL scale from baseline will demonstrate efficacy.                                                                                                                                                                            | ✓           | ✓       | ✓       |
| <i>Generalized Anxiety Disorder (GAD-7)</i> | GAD-7 is seven items, score from 0 (not at all) to 3 (nearly every day), providing a severity score between 0-21. Scores of 5, 10, and 15 represent cut points for                                                                                                                                                                                                                                                                                                                                                                                          | A 5-point change on the GAD-7 is considered clinically significant.                                                                                                                                                                                                                                                                                                                                                                                                                                          | ✓           | ✓       | ✓       |

|                                              |                                                                                                                                                                                                                                                                                                                                              |                                                                         |   |   |   |
|----------------------------------------------|----------------------------------------------------------------------------------------------------------------------------------------------------------------------------------------------------------------------------------------------------------------------------------------------------------------------------------------------|-------------------------------------------------------------------------|---|---|---|
|                                              | mild, moderate, and severe anxiety. The GAD-7 also is effective at identifying the presence of other anxiety disorders including panic disorder, social anxiety disorder, and post-traumatic stress disorder <sup>26</sup> .                                                                                                                 |                                                                         |   |   |   |
| <i>Physical Health Questionnaire (PHQ-9)</i> | The PHQ-9 is a 9-item survey with each item scored from 0 (not at all) to 3 (nearly every day) totalling from 0 to 27 points. Scores of 5, 10, 15, and 20 represent cut points for mild, moderate, moderately severe and severe depression. The PHQ assesses major depressive disorder, panic disorder, and anxiety disorder <sup>27</sup> . | A 5-point change is considered clinically significant.                  | ✓ | ✓ | ✓ |
| <i>Perceived Stress Scale (PSS)</i>          | The PSS is a 14-item survey that measures perceived stress, or the degree to which situations in one's life are appraised as stressful, on a four-point scale (0=never, 4=very often) over the last 30 days. The PSS is the most widely used psychological instrument for measuring the perception of stress <sup>29</sup> .                 | An 11-point change is considered clinically significant <sup>28</sup> . | ✓ | ✓ | ✓ |
| <i>COVID-19 Stress Scales (CSS)</i>          | COVID-19 related stress and anxiety will be measured using the 36-item CSS survey on five scales: (1) COVID danger and contamination fears, (2) COVID fears about economic consequences, (3) COVID xenophobia, (4) COVID compulsive checking and reassurance seeking, and (5) COVID traumatic stress symptoms <sup>33</sup> .                | Not reported.                                                           | ✓ | ✓ | ✓ |
| <i>Modified Fatigue Impact Scale-21.</i>     | This is a self-reported questionnaire consisting of 21 statements that reflect the perceived impact of fatigue on cognitive, physical, and psychosocial                                                                                                                                                                                      | A 16-point change is considered clinically significant <sup>30</sup> .  | ✓ | ✓ | ✓ |



|                                                    |                                                                                                                                                                                                                                                                                                                                                                                       |                                                                                                                                                                                                                                                                                                              |   |   |   |
|----------------------------------------------------|---------------------------------------------------------------------------------------------------------------------------------------------------------------------------------------------------------------------------------------------------------------------------------------------------------------------------------------------------------------------------------------|--------------------------------------------------------------------------------------------------------------------------------------------------------------------------------------------------------------------------------------------------------------------------------------------------------------|---|---|---|
|                                                    | functioning. Participants are asked to rate the extent to which fatigue has caused problems for them during the last four weeks. Each item is rated on a 5-point scale reflecting how often the person is limited in activities by fatigue, ranging from 0 (never) to 4 (almost always) <sup>31</sup> .                                                                               |                                                                                                                                                                                                                                                                                                              |   |   |   |
| <i>Patient Health Questionnaire-15 (PHQ-15)</i>    | The PHQ-15 measures the severity of 15 somatic symptoms (e.g., fatigue, energy, sleeping trouble, and pain) during the past 4 weeks for a score of 0 to 30. Items can be scored as 0 (not at all), 1 (bothered a little), or 2 (bothered a lot). PHQ-15 scores of 5, 10, and 15 represent cut points for low, medium, and high somatic symptom severity, respectively <sup>32</sup> . | A 5-point change on the PHQ-15 is considered clinically significant.                                                                                                                                                                                                                                         | ✓ | ✓ | ✓ |
| <i>Self-Compassion Scale – Short Form (SCS-SF)</i> | Participants will be asked to complete a 12-item self-reported scale measuring their self-compassion, including self-kindness, self-judgement, humanity, isolation, and mindfulness subscales.<br><br>To encourage their practice and feelings of self-compassion, participants will receive self-compassion messages weekly by email.                                                | Subscale scores are computed by calculating the mean of subscale items responses. Participants will indicate how often they behave in the stated manner, using a scale from 1 (almost never) to 5 (almost always) for a total of 60 points with lower scores indicating more self-compassion <sup>34</sup> . | ✓ | ✓ | ✓ |

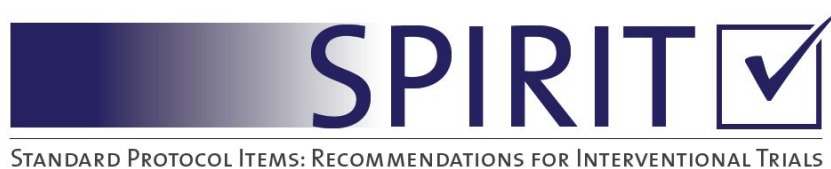

STANDARD PROTOCOL ITEMS: RECOMMENDATIONS FOR INTERVENTIONAL TRIALS

SPIRIT 2013 Checklist: Recommended items to address in a clinical trial protocol and related documents\*

| Section/item                      | Item No | Description                                                                                                                                                                                                                                                                                           |
|-----------------------------------|---------|-------------------------------------------------------------------------------------------------------------------------------------------------------------------------------------------------------------------------------------------------------------------------------------------------------|
| <b>Administrative information</b> |         |                                                                                                                                                                                                                                                                                                       |
| Title                             | 1       | Descriptive title identifying the study design, population, interventions, and, if applicable, trial acronym <b>(PG 1)</b>                                                                                                                                                                            |
| Trial registration                | 2a      | Trial identifier and registry name. If not yet registered, name of intended registry <b>(PG 3)</b>                                                                                                                                                                                                    |
|                                   | 2b      | All items from the World Health Organization Trial Registration Data Set <b>(N/A)</b>                                                                                                                                                                                                                 |
| Protocol version                  | 3       | Date and version identifier <b>(N/A)</b>                                                                                                                                                                                                                                                              |
| Funding                           | 4       | Sources and types of financial, material, and other support <b>(PG 20)</b>                                                                                                                                                                                                                            |
| Roles and responsibilities        | 5a      | Names, affiliations, and roles of protocol contributors <b>(PG 1, 2, 20)</b>                                                                                                                                                                                                                          |
|                                   | 5b      | Name and contact information for the trial sponsor <b>(N/A)</b>                                                                                                                                                                                                                                       |
|                                   | 5c      | Role of study sponsor and funders, if any, in study design; collection, management, analysis, and interpretation of data; writing of the report; and the decision to submit the report for publication, including whether they will have ultimate authority over any of these activities <b>(N/A)</b> |
|                                   | 5d      | Composition, roles, and responsibilities of the coordinating centre, steering committee, endpoint adjudication committee, data management team, and other individuals or groups overseeing the trial, if applicable (see Item 21a for data monitoring committee) <b>(N/A)</b>                         |
| <b>Introduction</b>               |         |                                                                                                                                                                                                                                                                                                       |
| Background and rationale          | 6a      | Description of research question and justification for undertaking the trial, including summary of relevant studies (published and unpublished), examining benefits and harms for each intervention <b>(PG 4, 5)</b>                                                                                  |
|                                   | 6b      | Explanation for choice of comparators <b>(PG 7, 8)</b>                                                                                                                                                                                                                                                |
| Objectives                        | 7       | Specific objectives or hypotheses <b>(PG 5)</b>                                                                                                                                                                                                                                                       |
| Trial design                      | 8       | Description of trial design including type of trial (eg, parallel group, crossover, factorial, single group), allocation ratio, and framework (eg, superiority, equivalence, noninferiority, exploratory) <b>(PG 5)</b>                                                                               |

## Methods: Participants, interventions, and outcomes

|                      |     |                                                                                                                                                                                                                                                                                                                                                                                                     |
|----------------------|-----|-----------------------------------------------------------------------------------------------------------------------------------------------------------------------------------------------------------------------------------------------------------------------------------------------------------------------------------------------------------------------------------------------------|
| Study setting        | 9   | Description of study settings (eg, community clinic, academic hospital) and list of countries where data will be collected. Reference to where list of study sites can be obtained <b>(PG 6)</b>                                                                                                                                                                                                    |
| Eligibility criteria | 10  | Inclusion and exclusion criteria for participants. If applicable, eligibility criteria for study centres and individuals who will perform the interventions (eg, surgeons, psychotherapists) <b>(PG 6)</b>                                                                                                                                                                                          |
| Interventions        | 11a | Interventions for each group with sufficient detail to allow replication, including how and when they will be administered <b>(PG 7, 8)</b>                                                                                                                                                                                                                                                         |
|                      | 11b | Criteria for discontinuing or modifying allocated interventions for a given trial participant (eg, drug dose change in response to harms, participant request, or improving/worsening disease) <b>(PG 7)</b>                                                                                                                                                                                        |
|                      | 11c | Strategies to improve adherence to intervention protocols, and any procedures for monitoring adherence (eg, drug tablet return, laboratory tests) <b>(PG 7, 8)</b>                                                                                                                                                                                                                                  |
|                      | 11d | Relevant concomitant care and interventions that are permitted or prohibited during the trial <b>(N/A)</b>                                                                                                                                                                                                                                                                                          |
| Outcomes             | 12  | Primary, secondary, and other outcomes, including the specific measurement variable (eg, systolic blood pressure), analysis metric (eg, change from baseline, final value, time to event), method of aggregation (eg, median, proportion), and time point for each outcome. Explanation of the clinical relevance of chosen efficacy and harm outcomes is strongly recommended <b>(PG 8, 9, 10)</b> |
| Participant timeline | 13  | Time schedule of enrolment, interventions (including any run-ins and washouts), assessments, and visits for participants. A schematic diagram is highly recommended (see Figure) <b>(PG 7, 8, 9. Please see supplementary material Table 1.)</b>                                                                                                                                                    |
| Sample size          | 14  | Estimated number of participants needed to achieve study objectives and how it was determined, including clinical and statistical assumptions supporting any sample size calculations <b>(PG 10)</b>                                                                                                                                                                                                |
| Recruitment          | 15  | Strategies for achieving adequate participant enrolment to reach target sample size <b>(PG 6, 7)</b>                                                                                                                                                                                                                                                                                                |

## Methods: Assignment of interventions (for controlled trials)

Allocation:

|    |                |     |                                                                         |
|----|----------------|-----|-------------------------------------------------------------------------|
| 1  |                |     |                                                                         |
| 2  | Sequence       | 16a | Method of generating the allocation sequence (eg, computer-             |
| 3  | generation     |     | generated random numbers), and list of any factors for stratification.  |
| 4  |                |     | To reduce predictability of a random sequence, details of any planned   |
| 5  |                |     | restriction (eg, blocking) should be provided in a separate document    |
| 6  |                |     | that is unavailable to those who enrol participants or assign           |
| 7  |                |     | interventions <b>(PG 11)</b>                                            |
| 8  |                |     |                                                                         |
| 9  |                |     |                                                                         |
| 10 | Allocation     | 16b | Mechanism of implementing the allocation sequence (eg, central          |
| 11 | concealment    |     | telephone; sequentially numbered, opaque, sealed envelopes),            |
| 12 | mechanism      |     | describing any steps to conceal the sequence until interventions are    |
| 13 |                |     | assigned <b>(PG 11)</b>                                                 |
| 14 |                |     |                                                                         |
| 15 | Implementation | 16c | Who will generate the allocation sequence, who will enrol participants, |
| 16 |                |     | and who will assign participants to interventions <b>(PG 11)</b>        |
| 17 |                |     |                                                                         |
| 18 |                |     |                                                                         |
| 19 | Blinding       | 17a | Who will be blinded after assignment to interventions (eg, trial        |
| 20 | (masking)      |     | participants, care providers, outcome assessors, data analysts), and    |
| 21 |                |     | how <b>(PG 11)</b>                                                      |
| 22 |                |     |                                                                         |
| 23 |                | 17b | If blinded, circumstances under which unblinding is permissible, and    |
| 24 |                |     | procedure for revealing a participant's allocated intervention during   |
| 25 |                |     | the trial <b>(N/A)</b>                                                  |
| 26 |                |     |                                                                         |
| 27 |                |     |                                                                         |

### Methods: Data collection, management, and analysis

|    |                 |     |                                                                               |
|----|-----------------|-----|-------------------------------------------------------------------------------|
| 28 |                 |     |                                                                               |
| 29 |                 |     |                                                                               |
| 30 | Data collection | 18a | Plans for assessment and collection of outcome, baseline, and other           |
| 31 | methods         |     | trial data, including any related processes to promote data quality (eg,      |
| 32 |                 |     | duplicate measurements, training of assessors) and a description of           |
| 33 |                 |     | study instruments (eg, questionnaires, laboratory tests) along with           |
| 34 |                 |     | their reliability and validity, if known. Reference to where data             |
| 35 |                 |     | collection forms can be found, if not in the protocol <b>(PG 8, 9. Please</b> |
| 36 |                 |     | <b>see supplementary material Table 1.)</b>                                   |
| 37 |                 |     |                                                                               |
| 38 |                 |     |                                                                               |
| 39 |                 | 18b | Plans to promote participant retention and complete follow-up,                |
| 40 |                 |     | including list of any outcome data to be collected for participants who       |
| 41 |                 |     | discontinue or deviate from intervention protocols <b>(Please see</b>         |
| 42 |                 |     | <b>supplementary material Table 1.)</b>                                       |
| 43 |                 |     |                                                                               |
| 44 |                 |     |                                                                               |
| 45 | Data            | 19  | Plans for data entry, coding, security, and storage, including any            |
| 46 | management      |     | related processes to promote data quality (eg, double data entry;             |
| 47 |                 |     | range checks for data values). Reference to where details of data             |
| 48 |                 |     | management procedures can be found, if not in the protocol <b>(PG 11)</b>     |
| 49 |                 |     |                                                                               |
| 50 |                 |     |                                                                               |
| 51 | Statistical     | 20a | Statistical methods for analysing primary and secondary outcomes.             |
| 52 | methods         |     | Reference to where other details of the statistical analysis plan can be      |
| 53 |                 |     | found, if not in the protocol <b>(PG 11, 12)</b>                              |
| 54 |                 |     |                                                                               |
| 55 |                 | 20b | Methods for any additional analyses (eg, subgroup and adjusted                |
| 56 |                 |     | analyses) <b>(PG 11, 12)</b>                                                  |
| 57 |                 |     |                                                                               |
| 58 |                 |     |                                                                               |
| 59 |                 |     |                                                                               |
| 60 |                 |     |                                                                               |

- 1  
2  
3  
4  
5  
6  
7  
8  
9  
10  
11  
12  
13  
14  
15  
16  
17  
18  
19  
20  
21  
22  
23  
24  
25  
26  
27  
28  
29  
30  
31  
32  
33  
34  
35  
36  
37  
38  
39  
40  
41  
42  
43  
44  
45  
46  
47  
48  
49  
50  
51  
52  
53  
54  
55  
56  
57  
58  
59  
60
- 20c Definition of analysis population relating to protocol non-adherence (eg, as randomised analysis), and any statistical methods to handle missing data (eg, multiple imputation) **(PG 12)**

### Methods: Monitoring

- Data monitoring 21a Composition of data monitoring committee (DMC); summary of its role and reporting structure; statement of whether it is independent from the sponsor and competing interests; and reference to where further details about its charter can be found, if not in the protocol. Alternatively, an explanation of why a DMC is not needed **(N/A)**
- 21b Description of any interim analyses and stopping guidelines, including who will have access to these interim results and make the final decision to terminate the trial **(N/A)**
- Harms 22 Plans for collecting, assessing, reporting, and managing solicited and spontaneously reported adverse events and other unintended effects of trial interventions or trial conduct **(N/A)**
- Auditing 23 Frequency and procedures for auditing trial conduct, if any, and whether the process will be independent from investigators and the sponsor **(N/A)**

### Ethics and dissemination

- Research ethics approval 24 Plans for seeking research ethics committee/institutional review board (REC/IRB) approval **(PG 14)**
- Protocol amendments 25 Plans for communicating important protocol modifications (eg, changes to eligibility criteria, outcomes, analyses) to relevant parties (eg, investigators, REC/IRBs, trial participants, trial registries, journals, regulators) **(PG 14)**
- Consent or assent 26a Who will obtain informed consent or assent from potential trial participants or authorised surrogates, and how (see Item 32) **(PG 14)**
- 26b Additional consent provisions for collection and use of participant data and biological specimens in ancillary studies, if applicable **(N/A)**
- Confidentiality 27 How personal information about potential and enrolled participants will be collected, shared, and maintained in order to protect confidentiality before, during, and after the trial **(PG 11)**
- Declaration of interests 28 Financial and other competing interests for principal investigators for the overall trial and each study site **(PG 20)**
- Access to data 29 Statement of who will have access to the final trial dataset, and disclosure of contractual agreements that limit such access for investigators **(PG 20)**

|    |                   |     |                                                                                |
|----|-------------------|-----|--------------------------------------------------------------------------------|
| 1  |                   |     |                                                                                |
| 2  | Ancillary and     | 30  | Provisions, if any, for ancillary and post-trial care, and for                 |
| 3  | post-trial care   |     | compensation to those who suffer harm from trial participation ( <b>Please</b> |
| 4  |                   |     | <b>see the study consent form.</b> )                                           |
| 5  |                   |     |                                                                                |
| 6  | Dissemination     | 31a | Plans for investigators and sponsor to communicate trial results to            |
| 7  | policy            |     | participants, healthcare professionals, the public, and other relevant         |
| 8  |                   |     | groups (eg, via publication, reporting in results databases, or other          |
| 9  |                   |     | data sharing arrangements), including any publication restrictions ( <b>pg</b> |
| 10 |                   |     | <b>14, 15</b> )                                                                |
| 11 |                   |     |                                                                                |
| 12 |                   | 31b | Authorship eligibility guidelines and any intended use of professional         |
| 13 |                   |     | writers ( <b>N/A</b> )                                                         |
| 14 |                   |     |                                                                                |
| 15 |                   | 31c | Plans, if any, for granting public access to the full protocol, participant-   |
| 16 |                   |     | level dataset, and statistical code ( <b>N/A</b> )                             |
| 17 |                   |     |                                                                                |
| 18 |                   |     |                                                                                |
| 19 |                   |     |                                                                                |
| 20 | <b>Appendices</b> |     |                                                                                |
| 21 |                   |     |                                                                                |
| 22 | Informed consent  | 32  | Model consent form and other related documentation given to                    |
| 23 | materials         |     | participants and authorised surrogates ( <b>Please see the study</b>           |
| 24 |                   |     | <b>consent form.</b> )                                                         |
| 25 |                   |     |                                                                                |
| 26 | Biological        | 33  | Plans for collection, laboratory evaluation, and storage of biological         |
| 27 | specimens         |     | specimens for genetic or molecular analysis in the current trial and for       |
| 28 |                   |     | future use in ancillary studies, if applicable ( <b>N/A</b> )                  |
| 29 |                   |     |                                                                                |

---

\*It is strongly recommended that this checklist be read in conjunction with the SPIRIT 2013 Explanation & Elaboration for important clarification on the items. Amendments to the protocol should be tracked and dated. The SPIRIT checklist is copyrighted by the SPIRIT Group under the Creative Commons "[Attribution-NonCommercial-NoDerivs 3.0 Unported](https://creativecommons.org/licenses/by-nc-nd/3.0/)" license.

# BMJ Open

## Meditation and Yoga for Irritable Bowel Syndrome: Study Protocol for a Randomized Clinical Trial (MY-IBS Study)

|                                 |                                                                                                                                                                                                                                                                                                                                                                                                                                                                                                                                             |
|---------------------------------|---------------------------------------------------------------------------------------------------------------------------------------------------------------------------------------------------------------------------------------------------------------------------------------------------------------------------------------------------------------------------------------------------------------------------------------------------------------------------------------------------------------------------------------------|
| Journal:                        | <i>BMJ Open</i>                                                                                                                                                                                                                                                                                                                                                                                                                                                                                                                             |
| Manuscript ID                   | bmjopen-2021-059604.R2                                                                                                                                                                                                                                                                                                                                                                                                                                                                                                                      |
| Article Type:                   | Protocol                                                                                                                                                                                                                                                                                                                                                                                                                                                                                                                                    |
| Date Submitted by the Author:   | 21-Apr-2022                                                                                                                                                                                                                                                                                                                                                                                                                                                                                                                                 |
| Complete List of Authors:       | D'Silva, Adrijana; University of Calgary, Department of Community Health Sciences<br>Marshall, Deborah; University of Calgary, Department of Community Health Sciences<br>Vallance, Jeffrey; Athabasca University<br>Nasser, Yasmin; University of Calgary, Department of Medicine; University of Calgary, Department of Medicine<br>Rajagopalan, Vidya; University of Calgary, Department of Medicine<br>MacKean, Gail; University of Calgary, Department of Community Health Sciences<br>Raman, Maitreyi; University of Calgary, Medicine |
| <b>Primary Subject Heading</b>: | Gastroenterology and hepatology                                                                                                                                                                                                                                                                                                                                                                                                                                                                                                             |
| Secondary Subject Heading:      | Complementary medicine, Mental health, Sports and exercise medicine                                                                                                                                                                                                                                                                                                                                                                                                                                                                         |
| Keywords:                       | Clinical trials < THERAPEUTICS, Functional bowel disorders < GASTROENTEROLOGY, MENTAL HEALTH                                                                                                                                                                                                                                                                                                                                                                                                                                                |
|                                 |                                                                                                                                                                                                                                                                                                                                                                                                                                                                                                                                             |

SCHOLARONE™  
Manuscripts

## MEDITATION AND YOGA FOR IBS

**Meditation and Yoga for Irritable Bowel Syndrome:****Study Protocol for a Randomized Clinical Trial (MY-IBS Study)**

Adrijana D'Silva, MHS<sup>1</sup>, Deborah A Marshall, PhD<sup>1,2</sup>, Jeff K. Vallance, PhD<sup>3</sup>, Yasmin Nasser, MD, PhD<sup>4,5</sup>, Vidya Rajagopalan, MHA<sup>4</sup>, Gail MacKean<sup>1</sup>, PhD, Maitreyi Raman, MD<sup>4</sup>

<sup>1</sup>Department of Community Health Sciences, Cumming School of Medicine, University of Calgary, Calgary, Canada

<sup>2</sup>Arthur J.E. Child Chair, Department of Medicine, Cumming School of Medicine, University of Calgary

<sup>3</sup>Faculty of Health Disciplines, Athabasca University, Athabasca, Canada

<sup>4</sup>Division of Gastroenterology and Hepatology, Department of Medicine, Cumming School of Medicine, University of Calgary

<sup>5</sup>Snyder Institute for Chronic Disease, Cumming School of Medicine, University of Calgary

Adrijana D'Silva

[adrijana.dsilva@ucalgary.ca](mailto:adrijana.dsilva@ucalgary.ca)

3280 Hospital Drive NW, Calgary, Alberta, T2N 4Z6

Deborah A Marshall

[damarsha@ucalgary.ca](mailto:damarsha@ucalgary.ca)

3280 Hospital Drive NW, Calgary, Alberta, T2N 4Z6

Jeff K. Vallance

[jeffv@athabascau.ca](mailto:jeffv@athabascau.ca)

1 University Drive, Athabasca, Alberta, T9S 3A3

Yasmin Nasser

[ynasser@ucalgary.ca](mailto:ynasser@ucalgary.ca)

3330 Hospital Drive NW Calgary, AB T2N 4N1

Vidya Rajagopalan

[vidya.rajagopalan@ucalgary.ca](mailto:vidya.rajagopalan@ucalgary.ca)

3280 Hospital Drive NW, Calgary, Alberta, T2N 4Z6

Gail MacKean

[glmackea@ucalgary.ca](mailto:glmackea@ucalgary.ca)

3280 Hospital Drive NW, Calgary, Alberta, T2N 4Z6



## MEDITATION AND YOGA FOR IBS

Maitreyi Raman

[mkothand@ucalgary.ca](mailto:mkothand@ucalgary.ca)

3280 Hospital Drive NW, Calgary, Alberta, T2N 4Z6

Corresponding Author:

Dr. Maitreyi Raman

6D33 TRW Building

3280 Hospital Drive NW

Calgary, AB, T2N 4N1, Canada

Email: [mkothand@ucalgary.ca](mailto:mkothand@ucalgary.ca)

For peer review only

## MEDITATION AND YOGA FOR IBS

**Abstract**

**Introduction:** When delivered in person, yoga has been shown to be effective in managing Irritable Bowel Syndrome (IBS) symptoms. Research is needed to test the feasibility and effectiveness of yoga as a therapeutic option when delivered virtually. The primary aim of the Mind and Yoga for IBS (MY-IBS) randomized controlled trial is to determine the effects of an eight-week virtual meditation and yoga intervention on IBS symptom severity compared with an advice-only active control group.

**Methods and analysis:** Adults diagnosed with IBS will be randomized to receive either a Upa yoga intervention or an advice-only control group. The intervention will consist of weekly online classes for eight weeks delivered by a facilitator using Microsoft Office Teams and daily home practice. Feasibility will be evaluated by examining recruitment and attrition rates, adherence, participant satisfaction with the program, and safety. The primary outcome is IBS symptom severity, and key secondary outcomes include (but not limited to) quality of life, anxiety and depression symptoms, COVID-19 related stress and anxiety, and fatigue. Outcomes will be assessed at baseline, four weeks, and eight weeks. An embedded design experimental model sub-study will be conducted post-intervention using qualitative research methods to identify participants' experiences in the yoga program.

**Ethics and dissemination:** This study has been approved by the Conjoint Health Research Ethics Board (REB ID 20-0084). Findings will be disseminated through peer-reviewed publication, conference presentation, and social media.

**Trial registration number:** NCT04302623

**Strengths and limitations:**

- Mixed methods study composed of a RCT and interviews
- First virtual yoga interventions in irritable bowel syndrome
- Canada-wide recruitment
- Self-reported outcome measures
- Lack of data capture on the frequency of yoga practice in the control group

## MEDITATION AND YOGA FOR IBS

**Introduction**

Stress is a physical, mental, or emotional response that causes tension in the mind or the body<sup>1</sup>. Altered stress response from psychological and physiological mechanisms may contribute to altered brain-gut signaling patterns and IBS symptoms. Psychological stressors, such as depression and anxiety, may influence gut function (e.g., reduced motility). Physiological stressors (e.g., infection) in the gut may affect the brain<sup>2</sup>. Therapies focusing on mind-body interactions and stress reduction may be adjunctive treatments for IBS. Stress management techniques that include both mind and body interventions such as yoga<sup>3</sup> have been effective in improving IBS symptom severity and mental health outcomes<sup>3 4</sup>. Mind-body interventions may modulate the brain-gut axis directly by reducing sympathetic activity and increasing parasympathetic activity and the hypothalamus-pituitary-adrenal axis<sup>5</sup>.

Yoga is a traditional *mind-body-breath* discipline that includes a triad of postures, structured breathing, and meditation<sup>6</sup>. Our recent review<sup>7</sup> identified four randomized controlled trials that examined traditional yoga practice as therapy for IBS patients<sup>8-11</sup>. These trials demonstrated yoga was more effective compared to pharmacological treatment and equally effective as dietary interventions or moderate-intensity walking. Physical and mental health improvements included IBS symptom severity, gastric motility, and depression.

Research is needed to determine the feasibility and effectiveness of virtual yoga programming as a therapeutic option for patients with IBS. The rationale for virtually delivered interventions to manage IBS is increasing due to rising demand, limited healthcare resources, and cost-effectiveness<sup>12 13</sup>. A recent review found virtual care tools may be effective in managing disease activity and improving outcomes in patients with digestive diseases<sup>14</sup>. This review also highlighted the high acceptability and satisfaction with virtual care among patients with IBS<sup>15-19</sup>.

## MEDITATION AND YOGA FOR IBS

The primary objective of the MY-IBS (Meditation and Yoga for Irritable Bowel Syndrome) study is to explore the feasibility and effectiveness of a virtual yoga program for patients with IBS. MY-IBS is a mixed-methods study including a randomized controlled trial and semi-structured interviews. The primary aim of this randomized controlled trial is to determine the effects of an eight-week virtual yoga intervention on IBS symptom severity, measured with the IBS Symptoms Severity Scale, compared to an advice-only control group. Secondary aims are to determine whether a) a yoga program delivered virtually is feasible for adults with IBS, b) improves health outcomes including quality of life, stress, and fatigue, and c) improves mental health outcomes including depression and anxiety symptoms. An embedded design experimental model qualitative sub-study using semi-structured interviews will explore and describe participants' experiences in the yoga program, and its impact. We hypothesize that the program will be feasible and effective in improving outcomes in the intervention group compared to the control group.

### Methods and Analysis

#### Study design overview

The quantitative study is a superiority randomized non-blinded two-group controlled trial. The qualitative study will use semi-structured interviews and thematic analysis to explore and describe intervention participant experiences and views of the yoga program.

#### Patient involvement

## MEDITATION AND YOGA FOR IBS

1  
2  
3 Patients with lived experience were involved in the conduct of this study. During the  
4 development stage, patient partners were invited to participate in a series of discussions with the  
5 research team to define the study research question, study design, choice of outcome measures,  
6 and methods of recruitment. Following the completion of the trial, the patient partners will be  
7 involved in the dissemination of this research.  
8  
9  
10  
11  
12  
13

### **Sample and selection**

14  
15  
16  
17 The MY-IBS stud will be conducted at the University of Calgary in Alberta, Canada  
18 starting March 2021 and ending early 2022. To be eligible in this study, participants must be  
19 diagnosed with IBS based on Rome IV criteria by a health care professional (e.g., physician,  
20 nurse, dietician), be 18-70 years old, have an adequate understanding of English, have an ability  
21 to provide written informed consent, score at least 75 out 500 points on the IBS Symptoms  
22 Severity Scale indicating mild IBS symptoms, and be on stable doses of medications for IBS  
23 (including anti-depressants) without major changes to diet or physical activity levels for at least  
24 eight weeks prior to starting the intervention. Individuals across Canada are eligible to  
25 participate. Exclusion criteria include a major physical impairment that would prevent the  
26 individual from doing yoga determined by either the patient or the study coordinator, and  
27 diagnosis of any major cognitive, psychological, or psychiatric disorder (e.g., major depression,  
28 schizophrenia) as identified by the treating physician or healthcare practitioner or screened by  
29 the study coordinator using the Patient Health Questionnaire-9.  
30  
31  
32  
33  
34  
35  
36  
37  
38  
39  
40  
41  
42  
43  
44  
45  
46

47 Participants will be identified through (a) gastroenterology clinics across Calgary,  
48 Alberta; (b) gastroenterologists across Canada who indicated interest in this study for their IBS  
49 patients in a previous survey conducted by our team (not published); (c) participants from the  
50 previous survey who indicated interest in this study and have given consent to be contacted; (d)  
51  
52  
53  
54  
55  
56  
57  
58  
59  
60

## MEDITATION AND YOGA FOR IBS

1  
2  
3 through social media; (e) self-referrals through the study website and the University of Calgary  
4 participate in research portal; (f) Canadian Association of Gastroenterologists monthly  
5 newsletter; and (g) participants with IBS who are enrolled in the IMAGINE (Inflammation,  
6 Microbiome and Alimentation Gastro-intestinal and Neuropsychiatric Effects) cohort study at the  
7 University of Calgary and have given their consent to be contacted for future studies.  
8  
9  
10  
11  
12  
13

14 Participant screening will use the Patient Health Questionnaire-9 (PHQ-9). Individuals  
15 who score 20 points or higher on the PHQ-9 indicating severe depression will not be eligible to  
16 participate. Reasons for exclusion are lack of compliance in interventional studies among these  
17 individuals, potential heterogeneity in the small sample size of participants, and skewed results if  
18 patients seek treatment for their depression during the trial.  
19  
20  
21  
22  
23  
24  
25

### **Interventions**

#### **Yoga intervention group**

26  
27  
28  
29  
30 Before their first class, the intervention group will receive an introductory video. The  
31 video will consist of information on IBS, information on the style of yoga they will be learning,  
32 and rationale for yoga as a treatment for IBS. The intervention will be delivered online by a  
33 certified yoga facilitator in class sizes of less than ten participants using the Microsoft Office  
34 Teams platform. Classes will be held once per week for the eight-week duration. The first  
35 session will be approximately 90 minutes and subsequent sessions up to 60 minutes. The  
36 introductory session will include the class setup, introductions, teaching poses, corrections, and  
37 a question and answers period. The yoga facilitator will provide participants with modifications  
38 for common challenges to support best practices and ensure safety. Subsequent classes will  
39 include a review from the previous week, a question and answer period, individual corrections  
40 and modifications, and introduce new practices. In addition to the online class component, study  
41  
42  
43  
44  
45  
46  
47  
48  
49  
50  
51  
52  
53  
54  
55  
56  
57  
58  
59  
60

## MEDITATION AND YOGA FOR IBS

1  
2  
3 staff will ask participants to practice the yoga program at home every day. They will also have  
4  
5 access to the yoga videos, written program instructions, and frequently answered questions  
6  
7 accessible through the study website to help support their home practice  
8  
9  
10 (<https://cumming.ucalgary.ca/research/ascend/resources/patient-resources/my-ibs>).

11  
12 Upa Yoga, developed by the Isha Foundation of Inner Sciences  
13  
14 (<https://isha.sadhguru.org/us/en>), will be promoted. Upa Yoga maintains the ancient principles  
15  
16 of Hatha Yoga and will be delivered by a certified yoga facilitator from the Isha Foundation.  
17  
18 The Upa Yoga program will consist of (a) directional movements and neck rotations, (b) hatha  
19  
20 yoga-based Yoga Namaskar, (c) breathing practices or alternate nostril breathing, (d) mantra  
21  
22 meditation consisting of AUM chanting (OM), and e) breath watching. Table 1 shows a  
23  
24 description of the program and rationale. Our published prospective study examining the  
25  
26 effectiveness of Upa Yoga in patients with Inflammatory Bowel Disease<sup>20</sup> shows improvements  
27  
28 in mental health scores after an eight-week yoga program.  
29  
30  
31

### **Advice-only control group**

32  
33  
34  
35 Control participants will receive a video including general education on IBS, the mind-  
36  
37 gut connection in IBS, and the role of mind-body therapies in the management of IBS. These  
38  
39 participants will also receive a list of IBS-related resources from the Canadian Digestive Health  
40  
41 Foundation, a link to an IBS patient support group ([www.ibspatient.org](http://www.ibspatient.org)), and information about  
42  
43 physical activity guidelines from the World Health Organization. Control participants will be  
44  
45 eligible to attend a two-week yoga program and receive the yoga videos eight weeks from the  
46  
47 time of enrolment. Data on these participants will not be collected as this participation option is  
48  
49 for participants who desire to receive the yoga sessions outside of the study.  
50  
51  
52

### **Outcome measures**

## MEDITATION AND YOGA FOR IBS

**Feasibility outcomes**

*Recruitment, attendance, and attrition rates.* Recruitment will be calculated by the percentage of participants who complete the eligibility and enrollment phases of the study. Attrition will be calculated by the percentage of participants who complete all study measures at baseline and eight weeks. A feasible intervention will be defined as class attendance of at least 75 percent (i.e., attendance in six out of eight classes)<sup>9</sup> and attrition rate of less than 30 percent.

*Adherence.* Adherence will be defined as practicing daily yoga for at least 80% of days for eight weeks (or 45 out of 56 days minimum). Each week a practice log will be provided to monitor frequency and length of yoga. The yoga facilitator will take attendance during each online class. To increase program adherence, the study coordinator will email intervention participants weekly. Six months following the completion of the intervention, participants will be asked to report the average frequency (i.e., days per month) and duration (i.e., minutes) of their yoga practices over the last seven days to evaluate long-term maintenance.

*Program satisfaction.* Intervention participants will complete a survey regarding overall satisfaction with their program, including satisfaction with videos and online class instruction. Videos and online classes will be deemed acceptable if at least 70% of participants are at least satisfied (i.e., rank classes as either good, great, or excellent). Participants will also indicate whether they would recommend the program to others on a scale from 1 (strongly disagree) to 7 (strongly agree) and provide feedback on how the program could be improved.

*Assessment of harms.* The study coordinator will screen potential participants and exclude those with any physical problems that may limit participation with yoga postures. Participants will be asked to report any adverse events experienced during the study period.



## MEDITATION AND YOGA FOR IBS

Participants with adverse events (e.g., injury resulting from the program) will be advised to consult their physician to provide care as appropriate.

**Effectiveness outcomes**

The primary outcome, IBS symptoms, will be measured using the *IBS-Symptom Severity Scale (IBS-SSS)*. The IBS-SSS is a five-question survey that asks the severity of abdominal pain, frequency of abdominal pain, severity of abdominal distention, dissatisfaction with bowel habits, and interference with QOL over the past 10 days. Scores on the IBS-SSS range from 0 to 500 with higher scores indicating more severe symptoms. Participants can be categorized as having mild (75-175), moderate (175-300), or severe (>300) IBS. Symptom reduction of at least 50 points is considered clinically meaningful.

Secondary outcomes (*and their measures*) include quality of life (*IBS-Quality of life*), anxiety (*Generalized Anxiety Disorder-7*), depression (*Patient Health Questionnaire-9*), stress (*Perceived Stress Scale*), COVID-19 stress (*COVID-19 Stress Scale*), fatigue (*Modified Fatigue Impact Scale-21*), somatic Symptoms (*Patient Health Questionnaire-15*), and self-compassion (*Self Compassion Scale-Short Form*) (Supplementary Table 1). Intention to practice yoga will also be assessed. The intervention and control groups will be assessed on effectiveness outcomes

## MEDITATION AND YOGA FOR IBS

at baseline, four, and eight weeks. The intervention group will complete measures of effectiveness outcomes six months after the intervention.

### **Sample size**

We will recruit twenty-five participants per group. However, assuming 30% attrition rate, we will aim to recruit 33 participants per group. Symptom reduction of at least 50 points is considered clinically meaningful, however a group difference has been shown to represent a considerable self-reported improvement<sup>21</sup>. We calculated the sample size using a mean difference of at least 83 points on the IBS-SSS ( $\alpha=0.05$ ,  $\beta=0.80$ , standard deviation of 103.8)<sup>9</sup>.

### **Randomization, treatment allocation, and blinding**

Study flow is shown in Figure 1. The study coordinator will obtain consent from participants who will then be enrolled in the study. Participants will be randomized after baseline assessment to either the yoga intervention or the advice-only control group. A statistician blinded to the randomization key will create a computer-generated REDCap randomized sequence to allocate participants based on gender (1:1:1 male:female:other) and depression (1:1 depression:no depression). Participants will be aware of the group to which they are allocated, however, the principal investigator and data analyst will remain blinded to the randomization process.

### **Data management**

All quantitative data will be entered into a secure REDCap database at the University of Calgary. Effectiveness outcome measures, program satisfaction, attendance, and adherence will be entered by the participants. Recruitment, attrition, and safety will be recorded by the study coordinator who is not blinded to the randomization. After the study, data will be downloaded, and patient identifiers will be removed from the data file. Data will be stored in a password-

## MEDITATION AND YOGA FOR IBS

protected file on a University of Calgary password protected computer. The interviews will be transcribed, deidentified, and uploaded to the University of Calgary's secure SharePoint site.

Only the research team will have access to the data.

### **Statistical analysis**

Descriptive analysis will summarize participant characteristics and feasibility outcomes. Univariate analysis of variance (ANOVA) will examine baseline differences between groups for variables with continuous data. Chi-square tests will examine baseline differences between groups for categorical variables. Unadjusted ANOVA and adjusted analysis of covariance (ANCOVA) models will compare differences in scores from baseline and post-intervention data within and between groups using intent to treat and per protocol analysis. A logistic regression – model examining determinants of responders (a minimum improvement of at least 50 points on the IBS-SSS scale) versus non-responders will be developed to predict a response to the intervention. This model will consider practice in minutes, baseline depression, anxiety, and IBS symptom severity scores. An  $\alpha$  of 0.05 will be the threshold for determining statistical significance. If the frequency of missing data is >5%, we will perform additional analyses using imputation methods. Analysis will be conducted using SPSS version 26.

### **Post-intervention interviews**

Participants who were randomized to the intervention and did not withdraw from the study will be invited by email to participate in an interview. We aim to recruit men and women and have equal representation of those who benefited from the program (i.e., experienced improvements in their IBS symptom severity) as well as individuals who did not. We anticipate needing to interview between 10 and 15 participants to reach both code and meaning saturation<sup>22</sup> aiming for a maximum variation sample.

## MEDITATION AND YOGA FOR IBS

1  
2  
3           Semi-structured interviews will capture participants' experiences, program satisfaction,  
4  
5 facilitators and barriers to participation, perceptions of social support and supervised learning,  
6  
7 perceived impact on IBS symptoms and overall physical and mental health, and input on  
8  
9 improving future programming (Table 2). Interviews will happen virtually using Microsoft  
10  
11 Office Teams and be approximately 30 to 45 minutes in length. The study coordinator will  
12  
13 interview the participants, take notes during the interview, and reflect following each interview.  
14  
15 Interview recordings will be transcribed verbatim without identifying information. Data will be  
16  
17 coded and analyzed in duplicate using NVivo 12. Thematic analysis inductively reveals patterns  
18  
19 and themes providing an understanding of participant experiences, with the program and their  
20  
21 perspectives on its impact. Thematic analysis is a method for systematically identifying,  
22  
23 organizing, and offering insight into patterns of meaning (themes) across a data set <sup>23</sup>. This  
24  
25 method makes sense of shared meanings and experiences that allows the researcher to identify  
26  
27 what data is important to the research question <sup>24</sup>.  
28  
29  
30  
31  
32  
33  
34

### Discussion

35  
36  
37           The MY-IBS study aims to determine the feasibility and effectiveness of an eight-week  
38  
39 virtual yoga and meditation program combined with home-based practice for patients with IBS.  
40  
41 Determining feasibility will be based on study recruitment, adherence, safety, and program  
42  
43 satisfaction. Improved IBS symptom management (the primary outcome) will determine  
44  
45 intervention effectiveness. Secondary outcomes include quality of life, stress, fatigue,  
46  
47 depression, anxiety, COVID-19-related stress and anxiety, and self-compassion. These findings  
48  
49 will inform potential predictors of responders versus non-responders. Predictors may be  
50  
51 considered in clinical practice to target the IBS patients most likely to benefit from the yoga  
52  
53  
54  
55  
56  
57

## MEDITATION AND YOGA FOR IBS

1  
2  
3 intervention. Interview themes and patterns will refine and inform the development of future  
4  
5 virtual yoga programming designed for IBS patients.  
6

7  
8 To our knowledge, there are no studies of virtual yoga and meditation in the IBS  
9  
10 population. The findings from this study may have implications for the management of IBS. The  
11  
12 virtual delivery of yoga represents an opportunity to increase access to effective management  
13  
14 therapies for patients with IBS. The COVID-19 pandemic has called for the reorganization of  
15  
16 health care including utilization of virtual care. Nearly 90% of care in the United States has been  
17  
18 delivered virtually since the pandemic<sup>25</sup>. Due to the COVID-19 pandemic, there is increased  
19  
20 psychological distress and gastrointestinal symptoms among individuals with IBS<sup>26 27</sup> compared  
21  
22 to individuals without IBS<sup>28</sup>. The present study offers a unique opportunity to examine  
23  
24 prospectively the feasibility and effectiveness of a yoga and meditation program delivered  
25  
26 virtually to individuals living with IBS with the COVID-19 pandemic restrictions taken into  
27  
28 consideration. Study findings may aid in developing interventions and services tailored to  
29  
30 patients with IBS. New insight into outcomes will be beneficial for healthcare leaders in  
31  
32 planning how to allocate existing resources to support these services and potentially lessen the  
33  
34 burden of IBS on both the individual and the health care system.  
35  
36  
37  
38  
39  
40  
41

### **Ethics and dissemination**

#### **Ethics**

42  
43  
44 The study protocol, informed consent form, and other study documents were reviewed  
45  
46 and approved by the University of Calgary's ethics board. All protocol modifications will be  
47  
48 submitted for review and approval by the ethics board. The trial participants will be informed of  
49  
50 any modifications, and re-consented by the study coordinator, if required. Further, the trial  
51  
52 registry for this study will be updated.  
53  
54  
55  
56  
57

## MEDITATION AND YOGA FOR IBS

1  
2  
3 Participation is voluntary and will not influence standard clinical care. All participants  
4 will provide informed written consent and have the right to withdraw from the study at any time.  
5  
6 Pending consent from the participant, all data collected up to the time of withdrawal will be used  
7  
8 in the final data analyses as advised by the CONSORT guidelines <sup>29</sup>.  
9  
10

### **Dissemination**

11  
12  
13  
14 Our targeted knowledge users and audiences will include researchers, healthcare  
15 professionals and service providers, persons with lived experiences, community groups, and  
16 professional organizations (e.g., Canadian Association of Gastroenterology). Our goal will be to  
17 increase topic area knowledge among these groups and inform future research. Our strategies  
18 will include conference presentations, publication in a peer reviewed journal, social media  
19 campaigns, development of virtually delivered tools such as mobile applications to increase  
20 accessibility and affordability and educational material distributed through the Digestive Health  
21 Foundation, IMAGINE SPOR Chronic Disease Network, and Primary Care Networks across  
22 Alberta.  
23  
24  
25  
26  
27  
28  
29  
30  
31  
32  
33  
34  
35  
36  
37  
38  
39  
40  
41  
42  
43  
44  
45  
46  
47  
48  
49  
50  
51  
52  
53  
54  
55  
56  
57  
58  
59  
60

## MEDITATION AND YOGA FOR IBS

Table 1. Overview of the Upa Yoga program.

| Program Component                       | Description                                                                                                                                                                                                   | Rationale                                                                                                                                                                                                                                                                                                                                                                                                                                                                                                                                             |
|-----------------------------------------|---------------------------------------------------------------------------------------------------------------------------------------------------------------------------------------------------------------|-------------------------------------------------------------------------------------------------------------------------------------------------------------------------------------------------------------------------------------------------------------------------------------------------------------------------------------------------------------------------------------------------------------------------------------------------------------------------------------------------------------------------------------------------------|
| <i>Directional Movement of the Arms</i> | This practice involves extending the arms in four directions (sideways, front, up and down) by rotating the wrists, while consciously focusing on the inhalation and exhalation of breath with each movement. | Studies show that fibromyalgia is common among patients living with IBS <sup>30</sup> . This could lead to pain of the muscles and joints, fatigue, and sleep concerns. The principle behind this practice is to lubricate the fluids in the joints, increase circulation and activate the energy nodes in these joints. Doing these practices everyday can relieve muscle and joint stiffness and reduce pain over time. This practice is recommended by the Isha Foundation to increase strengths and flexibility in preparation for Yoga Namaskar. |
| <i>Neck Practices</i>                   | There are five sets of neck practices, each stretching the neck and final one working on the shoulder area.                                                                                                   | The main cause of neck pain is usually muscle tension. Perceived stress can increase muscle tension. These neck exercises help relieve stress that can aggravate IBS symptoms. This practice is recommended by the Isha Foundation to increase strengths and flexibility in preparation for Yoga Namaskar.                                                                                                                                                                                                                                            |
| <i>Yoga Namaskar</i>                    | This practice involves a series of seven consecutive steps of upper body stretching and squatting, aligned with breath.                                                                                       | This practice activates the lumbar region of the spine and strengthens the spinal muscles <sup>31</sup> . While Yoga Namaskar has not been specifically studied in patients with IBS, yoga squatting postures have been associated with significant decrease in depression among nine individuals with IBD <sup>20</sup> and anxiety in a randomized self as control study in 30 healthy subjects <sup>32</sup> .                                                                                                                                     |
| <i>Alternate Nostril</i>                | The participant sits cross-legged with the spine comfortably erect and eyes closed. Closing the right nostril with the thumb,                                                                                 | Alternate nostril breathing is traditionally considered to alleviate mental unrest and                                                                                                                                                                                                                                                                                                                                                                                                                                                                |

## MEDITATION AND YOGA FOR IBS

|                                         |                                                                                                                                                                                                                                                                                                                                                                                     |                                                                                                                                                                                                                                                                                                        |
|-----------------------------------------|-------------------------------------------------------------------------------------------------------------------------------------------------------------------------------------------------------------------------------------------------------------------------------------------------------------------------------------------------------------------------------------|--------------------------------------------------------------------------------------------------------------------------------------------------------------------------------------------------------------------------------------------------------------------------------------------------------|
| <i>Breathing (Nadi Shuddhi)</i>         | inhaling and exhaling through the left nostril. This is repeated on the right nostril by closing the left nostril with the ring finger.                                                                                                                                                                                                                                             | promote physical and mental balance. <sup>33 34</sup> It has been demonstrated to decrease perceived stress and improve autonomic function in a randomized control trial compared to control subjects in healthy male volunteers, and decreased state anxiety in a prospective study. <sup>35 36</sup> |
| <i>Mantra Meditation (AUM chanting)</i> | The participants sit cross-legged, and with eyes closed, uttering each of these 3 sounds 7 times. The important aspect to this utterance is the awareness of the reverberations each of the sounds produces in the corresponding parts of the body: a - below the navel, o - mid-point of the chest, m - pit of the throat.                                                         | This mantra is thought to facilitate energy flow, and through vibratory mechanisms, creates peace and harmony leading to increased mental alertness and may improve symptoms of depression. <sup>37 38</sup>                                                                                           |
| <i>Breath watching</i>                  | The participants sit cross-legged with eyes closed and hold a hand gesture called the Yoga Mudra (the tips of the thumb and index finger come together forming a circle). They are instructed to maintain a gentle focus on the mid-point between both eyebrows (at the level of the pineal gland), while being conscious of the gentle movement of breath happening in their body. | Breathing in a focused manner can be used as a tool to promote positive changes to the mind, body and emotions. <sup>39</sup> Significant reduction in the level of state anxiety was found in a group of healthy male volunteers when they practiced breath awareness. <sup>16</sup>                  |



## MEDITATION AND YOGA FOR IBS

Table 2. Semi-structured interview questions and probes.

- 1  
2  
3  
4  
5  
6  
7  
8  
9  
10  
11  
12  
13  
14  
15  
16  
17  
18  
19  
20  
21  
22  
23  
24  
25  
26  
27  
28  
29  
30  
31  
32  
33  
34  
35  
36  
37  
38  
39  
40  
41  
42  
43  
44  
45  
46  
47  
48  
49  
50  
51  
52  
53  
54  
55  
56  
57  
58  
59  
60
- 1. What have you done in the past to manage your IBS?**
  - a. Have you tried yoga or mediation?
  - b. Have you tried exercise?
- 2. I would like to start by asking you what you were hoping for or expecting from the program?**
  - a. Why did you join this study?
  - b. Did anyone influence your decision to join?
  - c. Did that meet your expectations?
- 3. Next, I would like to discuss your overall experience in the MY-IBS yoga program in which you participated. Could you describe for me what participating in this program was like for you?**
  - a. What did you like most about it?
  - b. What didn't you like?
  - c. Did this change over the course of the program?

**Sub-questions:** *yoga facilitator/supervision, the timing of sessions/scheduling, length of sessions, attending with other members, online experience versus in-person, social support/other participants.*

  - d. What was that like?
  - e. What stood out for you?
  - f. What emotions were you aware of at the time?
  - g. What else do you remember about that experience?
- 4. How has participating in this program affected how you manage or live with your IBS?**

**Sub-questions:** *change in IBS symptoms; physical health, fatigue; mental health - stress, anxiety, depression; feeling better about myself; ability to live with my IBS.*

  - a. Tell me more about that.
  - b. Can you give me an example of what you mean?
  - c. How has that affected you?
- 5. What, if anything, has helped you to do your practices at home?**

**Sub-questions:** *social support, family support, convenience*

  - a. Tell me more about that.
  - b. Can you give me an example of what you mean?
  - c. How has that affected you?
- 6. What challenges did you have, if any, doing your practices at home?**

**Sub-questions:** *family, supervision/safety, schedule/time*

  - a. Are you satisfied with how you did?
  - b. Tell me more about that.

## MEDITATION AND YOGA FOR IBS

- 1  
2  
3 c. Can you give me an example of what you mean?  
4 d. How has that affected you?  
5  
6  
7 **7. What, if anything, has helped you to attend the weekly online class?**  
8 **Sub-questions:** *social support, family support, HCP support, yoga facilitator,*  
9 *supervision/safety, online classes, schedule/length*  
10 a. Tell me more about that.  
11 b. Can you give me an example of what you mean?  
12 c. How has that affected you?  
13  
14  
15  
16 **8. What challenges did you have, if any, to attend the weekly online class?**  
17 **Sub-questions:** *social support, family, yoga facilitator, supervision/safety, online*  
18 *classes, schedule, technical difficulties*  
19 a. Are you satisfied with how you did?  
20 b. Tell me more about that.  
21 c. Can you give me an example of what you mean?  
22 d. How has that affected you?  
23  
24  
25  
26  
27 **9. We are interested in any ideas you have about how we might make this program**  
28 **better. What could we do differently?**  
29 **Sub-questions:** *content, timing, facilitator, videos, website, delivery, other supports*  
30 a. Would you explain that further?  
31 b. Can you give me an example of what you mean?  
32  
33  
34 **10. Based on your experience with yoga, would you incorporate yoga to help manage**  
35 **your IBS? If so, how?**  
36  
37  
38 **11. Before we conclude, is this anything else you would like to say about your**  
39 **experience with this program, that we haven't had a chance to talk about yet?**  
40  
41  
42  
43  
44  
45  
46  
47  
48  
49  
50  
51  
52  
53  
54  
55  
56  
57  
58  
59  
60

## MEDITATION AND YOGA FOR IBS

**Strengths and limitations of this study:**

- Mixed methods study composed of a trial and interviews
- First virtual yoga intervention in Irritable Bowel Syndrome
- Canada-wide recruitment
- Self-reported outcome measures
- Lack of data capture on frequency of yoga practice in the control group

**Authors' contributions:** State how each author was involved in writing the protocol.

AD is involved in all aspects of protocol design and lead author of the manuscript. DM, JKV, YN, VR, and GM assisted with design of the protocol respective to their expertise. DM and GM assisted with the qualitative aspects of the protocol. JKV lead the statistical aspects of the protocol. YN provided their clinical expertise and patient recruitment through the clinic. VR provided their expertise in yoga therapy. MR is the senior author on the protocol and has guided the work of this research to support AD with their training. All authors reviewed the manuscript for study design and provided critical insight into manuscript content and approved the final version for submission.

**Funding statement:** This research received no specific grant from any funding agency in the public, commercial or not-for-profit sectors. DM receives partial salary support through the Arthur J.E. Child Chair.

**Competing interests statement:** None declared.

**Data availability:** Deidentified participant data will be made available upon reasonable request from the study principal investigator.

MEDITATION AND YOGA FOR IBS

1  
2  
3  
4  
5  
6  
7  
8  
9  
10  
11  
12  
13  
14  
15  
16  
17  
18  
19  
20  
21  
22  
23  
24  
25  
26  
27  
28  
29  
30  
31  
32  
33  
34  
35  
36  
37  
38  
39  
40  
41  
42  
43  
44  
45  
46  
47  
48  
49  
50  
51  
52  
53  
54  
55  
56  
57  
58  
59  
60

Figure 1. Participant flowchart based on the CONSORT guidelines.

For peer review only

## MEDITATION AND YOGA FOR IBS

## References

1. Crosswell AD, Lockwood KG. Best practices for stress measurement: How to measure psychological stress in health research. *Health Psychol Open* 2020;7(2):2055102920933072. doi: 10.1177/2055102920933072 [published Online First: 2020/07/25]
2. Mayer EA, Labus JS, Tillisch K, et al. Towards a systems view of IBS. *Nat Rev Gastroenterol Hepatol* 2015;12(10):592-605. doi: 10.1038/nrgastro.2015.121 [published Online First: 2015/08/26]
3. Schumann D, Anheyer D, Lauche R, et al. Effect of Yoga in the Therapy of Irritable Bowel Syndrome: A Systematic Review. *Clin Gastroenterol Hepatol* 2016;14(12):1720-31. doi: 10.1016/j.cgh.2016.04.026 [published Online First: 2016/04/27]
4. Ballou S, Keefer L. Psychological Interventions for Irritable Bowel Syndrome and Inflammatory Bowel Diseases. *Clin Transl Gastroenterol* 2017;8(1):e214. doi: 10.1038/ctg.2016.69 [published Online First: 2017/01/20]
5. Kavuri, Raghuram N, Malamud A, et al. Irritable Bowel Syndrome: Yoga as Remedial Therapy. *Evid Based Complement Alternat Med* 2015;2015:398156. doi: 10.1155/2015/398156 [published Online First: 2015/06/13]
6. Brems C, Colgan D, Freeman H, et al. Elements of yogic practice: Perceptions of students in healthcare programs. *International Journal of Yoga* 2016;9(2):121.
7. D'Silva A, MacQueen G, Nasser Y, et al. Yoga as a Therapy for Irritable Bowel Syndrome. *Dig Dis Sci* 2019 doi: 10.1007/s10620-019-05989-6 [published Online First: 2019/12/14]
8. Taneja I, Deepak KK, Poojary G, et al. Yogic versus conventional treatment in diarrhea-predominant irritable bowel syndrome: A randomized control study. *Applied Psychophysiology and Biofeedback* 2004;29(1):19-33.
9. Kavuri V, Selvan P, Malamud A, et al. Remedial yoga module remarkably improves symptoms in irritable bowel syndrome patients: A 12-week randomized controlled trial. *European Journal of Integrative Medicine* 2015;7(6):595-608. doi: 10.1016/j.eujim.2015.11.001
10. Shahabi L, Naliboff BD, Shapiro D. Self-regulation evaluation of therapeutic yoga and walking for patients with irritable bowel syndrome: a pilot study. *Psychol Health Med* 2016;21(2):176-88. doi: 10.1080/13548506.2015.1051557 [published Online First: 2015/06/19]
11. Schumann D, Langhorst J, Dobos G, et al. Randomised clinical trial: yoga vs a low-FODMAP diet in patients with irritable bowel syndrome. *Aliment Pharmacol Ther* 2018;47(2):203-11. doi: 10.1111/apt.14400 [published Online First: 2017/10/28]
12. Hanlon I, Hewitt C, Bell K, et al. Systematic review with meta-analysis: online psychological interventions for mental and physical health outcomes in gastrointestinal disorders including irritable bowel syndrome and inflammatory bowel disease. *Aliment Pharmacol Ther* 2018;48(3):244-59. doi: 10.1111/apt.14840 [published Online First: 2018/06/15]
13. Knowles SR, Mikocka-Walus A. Utilization and efficacy of internet-based eHealth technology in gastroenterology: a systematic review. *Scand J Gastroenterol* 2014;49(4):387-408. doi: 10.3109/00365521.2013.865259 [published Online First: 2014/02/06]
14. Helsel BC, Williams JE, Lawson K, et al. Telemedicine and Mobile Health Technology Are Effective in the Management of Digestive Diseases: A Systematic Review. *Dig Dis Sci* 2018;63(6):1392-408. doi: 10.1007/s10620-018-5054-z [published Online First: 2018/04/18]
15. Dorn SD, Palsson OS, Woldeghebriel M, et al. Development and pilot testing of an integrated, web-based self-management program for irritable bowel syndrome (IBS). *Neurogastroenterol Motil* 2015;27(1):128-34. doi: 10.1111/nmo.12487 [published Online First: 2014/12/09]
16. Everitt H, Moss-Morris R, Sibelli A, Tapp L, Coleman N, Yardley L, Smith P, Little P. Management of irritable bowel syndrome in primary care: the results of an exploratory randomised controlled

## MEDITATION AND YOGA FOR IBS

- 1  
2  
3 trial of mebeverine, methylcellulose, placebo and a self-management website. *BMC*  
4 *Gastroenterol* 2012;13(68):1-13. doi: <http://www.biomedcentral.com/1471-230X/13/68>  
5  
6 17. Hunt MG, Moshier S, Milonova M. Brief cognitive-behavioral internet therapy for irritable bowel  
7 syndrome. *Behav Res Ther* 2009;47(9):797-802. doi: 10.1016/j.brat.2009.05.002 [published  
8 Online First: 2009/07/03]  
9  
10 18. Ljotsson B, Andersson G, Andersson E, et al. Acceptability, effectiveness, and cost-effectiveness of  
11 internet-based exposure treatment for irritable bowel syndrome in a clinical sample: a  
12 randomized controlled trial. *BMC Gastroenterol* 2011;11:110. doi: 10.1186/1471-230X-11-110  
13 [published Online First: 2011/10/14]  
14  
15 19. Ljotsson B, Falk L, Vesterlund AW, et al. Internet-delivered exposure and mindfulness based therapy  
16 for irritable bowel syndrome--a randomized controlled trial. *Behav Res Ther* 2010;48(6):531-9.  
17 doi: 10.1016/j.brat.2010.03.003 [published Online First: 2010/04/07]  
18  
19 20. Kaur S, D'Silva A, Rajagopalan V, et al. Evaluation of an integrated yoga program in patients with  
20 inflammatory bowel disease: A pilot study. *Explore (NY)* 2021 doi:  
21 10.1016/j.explore.2021.04.006 [published Online First: 2021/07/03]  
22  
23 21. Francis CY, Morris J, Whorwell PJ. The irritable bowel syndrome scoring system: A simple method of  
24 monitoring irritable bowel syndrome and its progress. *Aliment Pharmacol Ther* 1997;11:395-  
25 402.  
26  
27 22. Hennink MM, Kaiser BN, Marconi VC. Code Saturation Versus Meaning Saturation: How Many  
28 Interviews Are Enough? *Qual Health Res* 2017;27(4):591-608. doi: 10.1177/1049732316665344  
29 [published Online First: 2016/09/28]  
30  
31 23. Braun VC, V. Using thematic analysis in psychology. *Qualitative Research in Psychology* 2006;3:77-  
32 101.  
33  
34 24. Braun VC, V. Can I use TA? Should I use TA? Should I not use TA? Comparing reflexive thematic  
35 analysis and other pattern-based qualitative analytic approaches. *Couns Psychother Res*  
36 2021;21:37-47.  
37  
38 25. Kendzerska T, Zhu DT, Gershon AS, et al. The Effects of the Health System Response to the COVID-19  
39 Pandemic on Chronic Disease Management: A Narrative Review. *Risk Manag Healthc Policy*  
40 2021;14:575-84. doi: 10.2147/RMHP.S293471 [published Online First: 2021/02/25]  
41  
42 26. Kamp KJ, Levy RL, Munson SA, et al. Impact of COVID-19 on Individuals With Irritable Bowel  
43 Syndrome and Comorbid Anxiety and/or Depression. *J Clin Gastroenterol* 2021 doi:  
44 10.1097/MCG.0000000000001515 [published Online First: 2021/03/30]  
45  
46 27. Oshima T, Siah KTH, Yoshimoto T, et al. Impacts of the COVID2019 pandemic on functional dyspepsia  
47 and irritable bowel syndrome: A population-based survey. *J Gastroenterol Hepatol* 2020 doi:  
48 10.1111/jgh.15346 [published Online First: 2020/11/17]  
49  
50 28. Sabate JM, Deutsch D, Melchior C, et al. COVID-19 pandemic and lockdown stress consequences in  
51 people with and without Irritable Bowel Syndrome. *Ethics Med Public Health* 2021;18:100660.  
52 doi: 10.1016/j.jemep.2021.100660 [published Online First: 2021/06/22]  
53  
54 29. Moher D, Hopewell S, Schulz KF, et al. CONSORT 2010 Explanation and Elaboration: Updated  
55 guidelines for reporting parallel group randomised trials. *J Clin Epidemiol* 2010;63(8):e1-37. doi:  
56 10.1016/j.jclinepi.2010.03.004 [published Online First: 2010/03/30]  
57  
58 30. Erdrich S, Hawrelak JA, Myers SP, et al. A systematic review of the association between fibromyalgia  
59 and functional gastrointestinal disorders. *Therap Adv Gastroenterol*  
60 2020;13:1756284820977402. doi: 10.1177/1756284820977402 [published Online First:  
2020/12/22]  
31. Vasudev SJ. Benefits of Yoga Namaskar 2021 [Available from: <https://isha.sadhguru.org/ca/en/yoga-meditation/yoga-program-for-beginners/yoga-for-overall-wellbeing2021>].

## MEDITATION AND YOGA FOR IBS

- 1  
2  
3  
4  
5  
6  
7  
8  
9  
10  
11  
12  
13  
14  
15  
16  
17  
18  
19  
20  
21  
22  
23  
24  
25  
26  
27  
28  
29  
30  
31  
32  
33  
34  
35  
36  
37  
38  
39  
40  
41  
42  
43  
44  
45  
46  
47  
48  
49  
50  
51  
52  
53  
54  
55  
56  
57  
58  
59  
60
32. Chandrasekeran A, Rajesh SK., Srinivasan TM. Effect of repetitive yogic squats with specific hand position (Thoppukaranam) on selective attention and psychological states. *International Journal of Yoga* 2014;7(1):76-79. doi: 10.4103/0973-6131.123497
33. Cramer H, Lauche R, Klose P, et al. Yoga for schizophrenia: a systematic review and meta-analysis. *BMC Psychiatry* 2013;13:32. doi: 10.1186/1471-244X-13-32 [published Online First: 2013/01/18]
34. Saraswati S. M S, S.S. Hatha yoga Pradipika. Munger, India, Bihar: Bihar School of Yoga 1985.
35. Naik GS, Gaur GS, Pal GK. Effect of Modified Slow Breathing Exercise on Perceived Stress and Basal Cardiovascular Parameters. *Int J Yoga* 2018;11(1):53-58. doi: 10.4103/ijoy.IJOY\_41\_16
36. Telles S, Vishwakarma B, Gupta RK, et al. Changes in Shape and Size Discrimination and State Anxiety After Alternate-Nostril Yoga Breathing and Breath Awareness in One Session Each. *Med Sci Monit Basic Res* 2019;25:121-27. doi: 10.12659/MSMBR.914956 [published Online First: 2019/04/22]
37. Telles S, Nagarathna R, Nagendra HR. Autonomic changes during "OM" meditation. *Indian J Physiol Pharmacol* 1995;39(4):418-20.
38. Rao NP, Deshpande G, Gangadhar KB, et al. Directional brain networks underlying OM chanting. *Asian J Psychiatr* 2018;37:20-25. doi: 10.1016/j.ajp.2018.08.001 [published Online First: 2018/08/03]
39. Arch JJ, Craske MG. Mechanisms of mindfulness: emotion regulation following a focused breathing induction. *Behav Res Ther* 2006;44(12):1849-58. doi: 10.1016/j.brat.2005.12.007 [published Online First: 2006/02/07]

1  
2  
3  
4  
5  
6  
7  
8  
9  
10  
11  
12  
13  
14  
15  
16  
17  
18  
19  
20  
21  
22  
23  
24  
25  
26  
27  
28  
29  
30  
31  
32  
33  
34  
35  
36  
37  
38  
39  
40  
41  
42  
43  
44  
45  
46  
47  
48  
49  
50  
51  
52  
53  
54  
55  
56  
57  
58  
59  
60



169x114mm (96 x 96 DPI)



Supplementary Table 1. Effectiveness outcomes measures.

| Measure                                     | Description                                                                                                                                                                                                                                                                                                                                                                                                                                                                                                                                                 | Scoring                                                                                                                                                                                                                                                                                                                                                                                                                                                                                                      | Assessments |         |         |
|---------------------------------------------|-------------------------------------------------------------------------------------------------------------------------------------------------------------------------------------------------------------------------------------------------------------------------------------------------------------------------------------------------------------------------------------------------------------------------------------------------------------------------------------------------------------------------------------------------------------|--------------------------------------------------------------------------------------------------------------------------------------------------------------------------------------------------------------------------------------------------------------------------------------------------------------------------------------------------------------------------------------------------------------------------------------------------------------------------------------------------------------|-------------|---------|---------|
|                                             |                                                                                                                                                                                                                                                                                                                                                                                                                                                                                                                                                             |                                                                                                                                                                                                                                                                                                                                                                                                                                                                                                              | Baseline    | 4 weeks | 8 weeks |
| <b>Primary outcome</b>                      |                                                                                                                                                                                                                                                                                                                                                                                                                                                                                                                                                             |                                                                                                                                                                                                                                                                                                                                                                                                                                                                                                              |             |         |         |
| <i>IBS-Symptom Severity Scale (IBS-SSS)</i> | The IBS-SSS is a five-question survey that asks the severity of abdominal pain, frequency of abdominal pain, severity of abdominal distention, dissatisfaction with bowel habits, and interference with QOL over the past 10 days. Subjects respond to each question on a 100-point visual analogue scale <sup>22</sup> . The IBS-SSS scale is the most frequently used severity measure for evaluating IBS severity and is commonly used as an outcome measure in clinical trials because it is highly responsive to change with treatment <sup>22</sup> . | Scores on the IBS-SSS range from 0 to 500 with higher scores indicating more severe symptoms. Participants can be categorized as having mild (75-175), moderate (175-300), or severe (>300) IBS.<br><br>Symptom reduction of at least 50 points is considered clinically meaningful; however, the primary endpoint will be the proportion of participants in each group who demonstrate a symptom reduction of 83 points or more, based on the variables used in the sample size calculation <sup>22</sup> . | ✓           | ✓       | ✓       |
| <b>Secondary outcomes</b>                   |                                                                                                                                                                                                                                                                                                                                                                                                                                                                                                                                                             |                                                                                                                                                                                                                                                                                                                                                                                                                                                                                                              |             |         |         |
| <i>IBS-Quality of life (IBS-QOL)</i>        | The IBS-QOL is a 34-item questionnaire that assesses the degree to which IBS interfered with QOL over the past 30 days. Each item is rated on a 1 to 5 Likert scale, with higher values indicating a lower QOL <sup>25</sup> . The IBS-QOL is currently the most validated and highly responsive self-reported QOL measure specific to IBS that can be used to assess the impact of IBS and its treatment <sup>25</sup> .                                                                                                                                   | The individual responses to the 34 items are summed and averaged for a total score and then transformed to a 0-100 scale for ease of interpretation with higher scores indicating better IBS specific QOL <sup>25</sup> .<br><br>An increment of at least 14 points on the IBS-QOL scale from baseline will demonstrate efficacy.                                                                                                                                                                            | ✓           | ✓       | ✓       |
| <i>Generalized Anxiety Disorder (GAD-7)</i> | GAD-7 is seven items, score from 0 (not at all) to 3 (nearly every day), providing a severity score between 0-21. Scores of 5, 10, and 15 represent cut points for                                                                                                                                                                                                                                                                                                                                                                                          | A 5-point change on the GAD-7 is considered clinically significant.                                                                                                                                                                                                                                                                                                                                                                                                                                          | ✓           | ✓       | ✓       |

|                                              |                                                                                                                                                                                                                                                                                                                                              |                                                                         |   |   |   |
|----------------------------------------------|----------------------------------------------------------------------------------------------------------------------------------------------------------------------------------------------------------------------------------------------------------------------------------------------------------------------------------------------|-------------------------------------------------------------------------|---|---|---|
|                                              | mild, moderate, and severe anxiety. The GAD-7 also is effective at identifying the presence of other anxiety disorders including panic disorder, social anxiety disorder, and post-traumatic stress disorder <sup>26</sup> .                                                                                                                 |                                                                         |   |   |   |
| <i>Physical Health Questionnaire (PHQ-9)</i> | The PHQ-9 is a 9-item survey with each item scored from 0 (not at all) to 3 (nearly every day) totalling from 0 to 27 points. Scores of 5, 10, 15, and 20 represent cut points for mild, moderate, moderately severe and severe depression. The PHQ assesses major depressive disorder, panic disorder, and anxiety disorder <sup>27</sup> . | A 5-point change is considered clinically significant.                  | ✓ | ✓ | ✓ |
| <i>Perceived Stress Scale (PSS)</i>          | The PSS is a 14-item survey that measures perceived stress, or the degree to which situations in one's life are appraised as stressful, on a four-point scale (0=never, 4=very often) over the last 30 days. The PSS is the most widely used psychological instrument for measuring the perception of stress <sup>29</sup> .                 | An 11-point change is considered clinically significant <sup>28</sup> . | ✓ | ✓ | ✓ |
| <i>COVID-19 Stress Scales (CSS)</i>          | COVID-19 related stress and anxiety will be measured using the 36-item CSS survey on five scales: (1) COVID danger and contamination fears, (2) COVID fears about economic consequences, (3) COVID xenophobia, (4) COVID compulsive checking and reassurance seeking, and (5) COVID traumatic stress symptoms <sup>33</sup> .                | Not reported.                                                           | ✓ | ✓ | ✓ |
| <i>Modified Fatigue Impact Scale-21.</i>     | This is a self-reported questionnaire consisting of 21 statements that reflect the perceived impact of fatigue on cognitive, physical, and psychosocial                                                                                                                                                                                      | A 16-point change is considered clinically significant <sup>30</sup> .  | ✓ | ✓ | ✓ |

|                                                    |                                                                                                                                                                                                                                                                                                                                                                                       |                                                                                                                                                                                                                                                                                                              |   |   |   |
|----------------------------------------------------|---------------------------------------------------------------------------------------------------------------------------------------------------------------------------------------------------------------------------------------------------------------------------------------------------------------------------------------------------------------------------------------|--------------------------------------------------------------------------------------------------------------------------------------------------------------------------------------------------------------------------------------------------------------------------------------------------------------|---|---|---|
|                                                    | functioning. Participants are asked to rate the extent to which fatigue has caused problems for them during the last four weeks. Each item is rated on a 5-point scale reflecting how often the person is limited in activities by fatigue, ranging from 0 (never) to 4 (almost always) <sup>31</sup> .                                                                               |                                                                                                                                                                                                                                                                                                              |   |   |   |
| <i>Patient Health Questionnaire-15 (PHQ-15)</i>    | The PHQ-15 measures the severity of 15 somatic symptoms (e.g., fatigue, energy, sleeping trouble, and pain) during the past 4 weeks for a score of 0 to 30. Items can be scored as 0 (not at all), 1 (bothered a little), or 2 (bothered a lot). PHQ-15 scores of 5, 10, and 15 represent cut points for low, medium, and high somatic symptom severity, respectively <sup>32</sup> . | A 5-point change on the PHQ-15 is considered clinically significant.                                                                                                                                                                                                                                         | ✓ | ✓ | ✓ |
| <i>Self-Compassion Scale – Short Form (SCS-SF)</i> | Participants will be asked to complete a 12-item self-reported scale measuring their self-compassion, including self-kindness, self-judgement, humanity, isolation, and mindfulness subscales.<br><br>To encourage their practice and feelings of self-compassion, participants will receive self-compassion messages weekly by email.                                                | Subscale scores are computed by calculating the mean of subscale items responses. Participants will indicate how often they behave in the stated manner, using a scale from 1 (almost never) to 5 (almost always) for a total of 60 points with lower scores indicating more self-compassion <sup>34</sup> . | ✓ | ✓ | ✓ |



SPIRIT 2013 Checklist: Recommended items to address in a clinical trial protocol and related documents\*

| Section/item                      | Item No | Description                                                                                                                                                                                                                                                                                           |
|-----------------------------------|---------|-------------------------------------------------------------------------------------------------------------------------------------------------------------------------------------------------------------------------------------------------------------------------------------------------------|
| <b>Administrative information</b> |         |                                                                                                                                                                                                                                                                                                       |
| Title                             | 1       | Descriptive title identifying the study design, population, interventions, and, if applicable, trial acronym <b>(PG 1)</b>                                                                                                                                                                            |
| Trial registration                | 2a      | Trial identifier and registry name. If not yet registered, name of intended registry <b>(PG 3)</b>                                                                                                                                                                                                    |
|                                   | 2b      | All items from the World Health Organization Trial Registration Data Set <b>(N/A)</b>                                                                                                                                                                                                                 |
| Protocol version                  | 3       | Date and version identifier <b>(N/A)</b>                                                                                                                                                                                                                                                              |
| Funding                           | 4       | Sources and types of financial, material, and other support <b>(PG 20)</b>                                                                                                                                                                                                                            |
| Roles and responsibilities        | 5a      | Names, affiliations, and roles of protocol contributors <b>(PG 1, 2, 20)</b>                                                                                                                                                                                                                          |
|                                   | 5b      | Name and contact information for the trial sponsor <b>(N/A)</b>                                                                                                                                                                                                                                       |
|                                   | 5c      | Role of study sponsor and funders, if any, in study design; collection, management, analysis, and interpretation of data; writing of the report; and the decision to submit the report for publication, including whether they will have ultimate authority over any of these activities <b>(N/A)</b> |
|                                   | 5d      | Composition, roles, and responsibilities of the coordinating centre, steering committee, endpoint adjudication committee, data management team, and other individuals or groups overseeing the trial, if applicable (see Item 21a for data monitoring committee) <b>(N/A)</b>                         |
| <b>Introduction</b>               |         |                                                                                                                                                                                                                                                                                                       |
| Background and rationale          | 6a      | Description of research question and justification for undertaking the trial, including summary of relevant studies (published and unpublished), examining benefits and harms for each intervention <b>(PG 4, 5)</b>                                                                                  |
|                                   | 6b      | Explanation for choice of comparators <b>(PG 7, 8)</b>                                                                                                                                                                                                                                                |
| Objectives                        | 7       | Specific objectives or hypotheses <b>(PG 5)</b>                                                                                                                                                                                                                                                       |
| Trial design                      | 8       | Description of trial design including type of trial (eg, parallel group, crossover, factorial, single group), allocation ratio, and framework (eg, superiority, equivalence, noninferiority, exploratory) <b>(PG 5)</b>                                                                               |

## Methods: Participants, interventions, and outcomes

|                      |     |                                                                                                                                                                                                                                                                                                                                                                                                     |
|----------------------|-----|-----------------------------------------------------------------------------------------------------------------------------------------------------------------------------------------------------------------------------------------------------------------------------------------------------------------------------------------------------------------------------------------------------|
| Study setting        | 9   | Description of study settings (eg, community clinic, academic hospital) and list of countries where data will be collected. Reference to where list of study sites can be obtained <b>(PG 6)</b>                                                                                                                                                                                                    |
| Eligibility criteria | 10  | Inclusion and exclusion criteria for participants. If applicable, eligibility criteria for study centres and individuals who will perform the interventions (eg, surgeons, psychotherapists) <b>(PG 6)</b>                                                                                                                                                                                          |
| Interventions        | 11a | Interventions for each group with sufficient detail to allow replication, including how and when they will be administered <b>(PG 7, 8)</b>                                                                                                                                                                                                                                                         |
|                      | 11b | Criteria for discontinuing or modifying allocated interventions for a given trial participant (eg, drug dose change in response to harms, participant request, or improving/worsening disease) <b>(PG 7)</b>                                                                                                                                                                                        |
|                      | 11c | Strategies to improve adherence to intervention protocols, and any procedures for monitoring adherence (eg, drug tablet return, laboratory tests) <b>(PG 7, 8)</b>                                                                                                                                                                                                                                  |
|                      | 11d | Relevant concomitant care and interventions that are permitted or prohibited during the trial <b>(N/A)</b>                                                                                                                                                                                                                                                                                          |
| Outcomes             | 12  | Primary, secondary, and other outcomes, including the specific measurement variable (eg, systolic blood pressure), analysis metric (eg, change from baseline, final value, time to event), method of aggregation (eg, median, proportion), and time point for each outcome. Explanation of the clinical relevance of chosen efficacy and harm outcomes is strongly recommended <b>(PG 8, 9, 10)</b> |
| Participant timeline | 13  | Time schedule of enrolment, interventions (including any run-ins and washouts), assessments, and visits for participants. A schematic diagram is highly recommended (see Figure) <b>(PG 7, 8, 9. Please see supplementary material Table 1.)</b>                                                                                                                                                    |
| Sample size          | 14  | Estimated number of participants needed to achieve study objectives and how it was determined, including clinical and statistical assumptions supporting any sample size calculations <b>(PG 10)</b>                                                                                                                                                                                                |
| Recruitment          | 15  | Strategies for achieving adequate participant enrolment to reach target sample size <b>(PG 6, 7)</b>                                                                                                                                                                                                                                                                                                |

## Methods: Assignment of interventions (for controlled trials)

Allocation:

|    |                |     |                                                                         |
|----|----------------|-----|-------------------------------------------------------------------------|
| 1  |                |     |                                                                         |
| 2  | Sequence       | 16a | Method of generating the allocation sequence (eg, computer-             |
| 3  | generation     |     | generated random numbers), and list of any factors for stratification.  |
| 4  |                |     | To reduce predictability of a random sequence, details of any planned   |
| 5  |                |     | restriction (eg, blocking) should be provided in a separate document    |
| 6  |                |     | that is unavailable to those who enrol participants or assign           |
| 7  |                |     | interventions <b>(PG 11)</b>                                            |
| 8  |                |     |                                                                         |
| 9  |                |     |                                                                         |
| 10 | Allocation     | 16b | Mechanism of implementing the allocation sequence (eg, central          |
| 11 | concealment    |     | telephone; sequentially numbered, opaque, sealed envelopes),            |
| 12 | mechanism      |     | describing any steps to conceal the sequence until interventions are    |
| 13 |                |     | assigned <b>(PG 11)</b>                                                 |
| 14 |                |     |                                                                         |
| 15 | Implementation | 16c | Who will generate the allocation sequence, who will enrol participants, |
| 16 |                |     | and who will assign participants to interventions <b>(PG 11)</b>        |
| 17 |                |     |                                                                         |
| 18 |                |     |                                                                         |
| 19 | Blinding       | 17a | Who will be blinded after assignment to interventions (eg, trial        |
| 20 | (masking)      |     | participants, care providers, outcome assessors, data analysts), and    |
| 21 |                |     | how <b>(PG 11)</b>                                                      |
| 22 |                |     |                                                                         |
| 23 |                | 17b | If blinded, circumstances under which unblinding is permissible, and    |
| 24 |                |     | procedure for revealing a participant's allocated intervention during   |
| 25 |                |     | the trial <b>(N/A)</b>                                                  |
| 26 |                |     |                                                                         |
| 27 |                |     |                                                                         |

### Methods: Data collection, management, and analysis

|    |                 |     |                                                                               |
|----|-----------------|-----|-------------------------------------------------------------------------------|
| 28 |                 |     |                                                                               |
| 29 |                 |     |                                                                               |
| 30 | Data collection | 18a | Plans for assessment and collection of outcome, baseline, and other           |
| 31 | methods         |     | trial data, including any related processes to promote data quality (eg,      |
| 32 |                 |     | duplicate measurements, training of assessors) and a description of           |
| 33 |                 |     | study instruments (eg, questionnaires, laboratory tests) along with           |
| 34 |                 |     | their reliability and validity, if known. Reference to where data             |
| 35 |                 |     | collection forms can be found, if not in the protocol <b>(PG 8, 9. Please</b> |
| 36 |                 |     | <b>see supplementary material Table 1.)</b>                                   |
| 37 |                 |     |                                                                               |
| 38 |                 |     |                                                                               |
| 39 |                 | 18b | Plans to promote participant retention and complete follow-up,                |
| 40 |                 |     | including list of any outcome data to be collected for participants who       |
| 41 |                 |     | discontinue or deviate from intervention protocols <b>(Please see</b>         |
| 42 |                 |     | <b>supplementary material Table 1.)</b>                                       |
| 43 |                 |     |                                                                               |
| 44 |                 |     |                                                                               |
| 45 | Data            | 19  | Plans for data entry, coding, security, and storage, including any            |
| 46 | management      |     | related processes to promote data quality (eg, double data entry;             |
| 47 |                 |     | range checks for data values). Reference to where details of data             |
| 48 |                 |     | management procedures can be found, if not in the protocol <b>(PG 11)</b>     |
| 49 |                 |     |                                                                               |
| 50 |                 |     |                                                                               |
| 51 | Statistical     | 20a | Statistical methods for analysing primary and secondary outcomes.             |
| 52 | methods         |     | Reference to where other details of the statistical analysis plan can be      |
| 53 |                 |     | found, if not in the protocol <b>(PG 11, 12)</b>                              |
| 54 |                 |     |                                                                               |
| 55 |                 | 20b | Methods for any additional analyses (eg, subgroup and adjusted                |
| 56 |                 |     | analyses) <b>(PG 11, 12)</b>                                                  |
| 57 |                 |     |                                                                               |
| 58 |                 |     |                                                                               |
| 59 |                 |     |                                                                               |
| 60 |                 |     |                                                                               |

- 1  
2  
3  
4  
5  
6  
7
- 20c Definition of analysis population relating to protocol non-adherence (eg, as randomised analysis), and any statistical methods to handle missing data (eg, multiple imputation) **(PG 12)**

### 8 **Methods: Monitoring**

- 9  
10  
11  
12  
13  
14  
15  
16  
17  
18  
19  
20  
21  
22  
23  
24  
25  
26  
27  
28
- Data monitoring 21a Composition of data monitoring committee (DMC); summary of its role and reporting structure; statement of whether it is independent from the sponsor and competing interests; and reference to where further details about its charter can be found, if not in the protocol. Alternatively, an explanation of why a DMC is not needed **(N/A)**
- 21b Description of any interim analyses and stopping guidelines, including who will have access to these interim results and make the final decision to terminate the trial **(N/A)**
- Harms 22 Plans for collecting, assessing, reporting, and managing solicited and spontaneously reported adverse events and other unintended effects of trial interventions or trial conduct **(N/A)**
- Auditing 23 Frequency and procedures for auditing trial conduct, if any, and whether the process will be independent from investigators and the sponsor **(N/A)**

### 29 **Ethics and dissemination**

- 30  
31  
32  
33  
34  
35  
36  
37  
38  
39  
40  
41  
42  
43  
44  
45  
46  
47  
48  
49  
50  
51  
52  
53  
54  
55  
56  
57  
58  
59  
60
- Research ethics approval 24 Plans for seeking research ethics committee/institutional review board (REC/IRB) approval **(PG 14)**
- Protocol amendments 25 Plans for communicating important protocol modifications (eg, changes to eligibility criteria, outcomes, analyses) to relevant parties (eg, investigators, REC/IRBs, trial participants, trial registries, journals, regulators) **(PG 14)**
- Consent or assent 26a Who will obtain informed consent or assent from potential trial participants or authorised surrogates, and how (see Item 32) **(PG 14)**
- 26b Additional consent provisions for collection and use of participant data and biological specimens in ancillary studies, if applicable **(N/A)**
- Confidentiality 27 How personal information about potential and enrolled participants will be collected, shared, and maintained in order to protect confidentiality before, during, and after the trial **(PG 11)**
- Declaration of interests 28 Financial and other competing interests for principal investigators for the overall trial and each study site **(PG 20)**
- Access to data 29 Statement of who will have access to the final trial dataset, and disclosure of contractual agreements that limit such access for investigators **(PG 20)**

|    |                   |     |                                                                                |
|----|-------------------|-----|--------------------------------------------------------------------------------|
| 1  |                   |     |                                                                                |
| 2  | Ancillary and     | 30  | Provisions, if any, for ancillary and post-trial care, and for                 |
| 3  | post-trial care   |     | compensation to those who suffer harm from trial participation ( <b>Please</b> |
| 4  |                   |     | <b>see the study consent form.</b> )                                           |
| 5  |                   |     |                                                                                |
| 6  | Dissemination     | 31a | Plans for investigators and sponsor to communicate trial results to            |
| 7  | policy            |     | participants, healthcare professionals, the public, and other relevant         |
| 8  |                   |     | groups (eg, via publication, reporting in results databases, or other          |
| 9  |                   |     | data sharing arrangements), including any publication restrictions ( <b>pg</b> |
| 10 |                   |     | <b>14, 15</b> )                                                                |
| 11 |                   |     |                                                                                |
| 12 |                   |     |                                                                                |
| 13 |                   | 31b | Authorship eligibility guidelines and any intended use of professional         |
| 14 |                   |     | writers ( <b>N/A</b> )                                                         |
| 15 |                   |     |                                                                                |
| 16 |                   | 31c | Plans, if any, for granting public access to the full protocol, participant-   |
| 17 |                   |     | level dataset, and statistical code ( <b>N/A</b> )                             |
| 18 |                   |     |                                                                                |
| 19 |                   |     |                                                                                |
| 20 | <b>Appendices</b> |     |                                                                                |
| 21 |                   |     |                                                                                |
| 22 | Informed consent  | 32  | Model consent form and other related documentation given to                    |
| 23 | materials         |     | participants and authorised surrogates ( <b>Please see the study</b>           |
| 24 |                   |     | <b>consent form.</b> )                                                         |
| 25 |                   |     |                                                                                |
| 26 | Biological        | 33  | Plans for collection, laboratory evaluation, and storage of biological         |
| 27 | specimens         |     | specimens for genetic or molecular analysis in the current trial and for       |
| 28 |                   |     | future use in ancillary studies, if applicable ( <b>N/A</b> )                  |
| 29 |                   |     |                                                                                |

---

30 \*It is strongly recommended that this checklist be read in conjunction with the SPIRIT 2013

31 Explanation & Elaboration for important clarification on the items. Amendments to the

32 protocol should be tracked and dated. The SPIRIT checklist is copyrighted by the SPIRIT

33 Group under the Creative Commons "[Attribution-NonCommercial-NoDerivs 3.0 Unported](https://creativecommons.org/licenses/by-nc-nd/3.0/)"

34 license.

35

36

37

38

39

40

41

42

43

44

45

46

47

48

49

50

51

52

53

54

55

56

57

58

59

60



# BMJ Open

## Meditation and Yoga for Irritable Bowel Syndrome: Study Protocol for a Randomized Clinical Trial (MY-IBS Study)

|                                 |                                                                                                                                                                                                                                                                                                                                                                                                                                                                                                                                             |
|---------------------------------|---------------------------------------------------------------------------------------------------------------------------------------------------------------------------------------------------------------------------------------------------------------------------------------------------------------------------------------------------------------------------------------------------------------------------------------------------------------------------------------------------------------------------------------------|
| Journal:                        | <i>BMJ Open</i>                                                                                                                                                                                                                                                                                                                                                                                                                                                                                                                             |
| Manuscript ID                   | bmjopen-2021-059604.R3                                                                                                                                                                                                                                                                                                                                                                                                                                                                                                                      |
| Article Type:                   | Protocol                                                                                                                                                                                                                                                                                                                                                                                                                                                                                                                                    |
| Date Submitted by the Author:   | 04-May-2022                                                                                                                                                                                                                                                                                                                                                                                                                                                                                                                                 |
| Complete List of Authors:       | D'Silva, Adrijana; University of Calgary, Department of Community Health Sciences<br>Marshall, Deborah; University of Calgary, Department of Community Health Sciences<br>Vallance, Jeffrey; Athabasca University<br>Nasser, Yasmin; University of Calgary, Department of Medicine; University of Calgary, Department of Medicine<br>Rajagopalan, Vidya; University of Calgary, Department of Medicine<br>MacKean, Gail; University of Calgary, Department of Community Health Sciences<br>Raman, Maitreyi; University of Calgary, Medicine |
| <b>Primary Subject Heading</b>: | Gastroenterology and hepatology                                                                                                                                                                                                                                                                                                                                                                                                                                                                                                             |
| Secondary Subject Heading:      | Complementary medicine, Mental health, Sports and exercise medicine                                                                                                                                                                                                                                                                                                                                                                                                                                                                         |
| Keywords:                       | Clinical trials < THERAPEUTICS, Functional bowel disorders < GASTROENTEROLOGY, MENTAL HEALTH                                                                                                                                                                                                                                                                                                                                                                                                                                                |
|                                 |                                                                                                                                                                                                                                                                                                                                                                                                                                                                                                                                             |

SCHOLARONE™  
Manuscripts

## MEDITATION AND YOGA FOR IBS

**Meditation and Yoga for Irritable Bowel Syndrome:****Study Protocol for a Randomized Clinical Trial (MY-IBS Study)**

Adrijana D'Silva, MHS<sup>1</sup>, Deborah A Marshall, PhD<sup>1,2</sup>, Jeff K. Vallance, PhD<sup>3</sup>, Yasmin Nasser, MD, PhD<sup>4,5</sup>, Vidya Rajagopalan, MHA<sup>4</sup>, Gail MacKean<sup>1</sup>, PhD, Maitreyi Raman, MD<sup>4</sup>

<sup>1</sup>Department of Community Health Sciences, Cumming School of Medicine, University of Calgary, Calgary, Canada

<sup>2</sup>Arthur J.E. Child Chair, Department of Medicine, Cumming School of Medicine, University of Calgary

<sup>3</sup>Faculty of Health Disciplines, Athabasca University, Athabasca, Canada

<sup>4</sup>Division of Gastroenterology and Hepatology, Department of Medicine, Cumming School of Medicine, University of Calgary

<sup>5</sup>Snyder Institute for Chronic Disease, Cumming School of Medicine, University of Calgary

Adrijana D'Silva

[adrijana.dsilva@ucalgary.ca](mailto:adrijana.dsilva@ucalgary.ca)

3280 Hospital Drive NW, Calgary, Alberta, T2N 4Z6

Deborah A Marshall

[damarsha@ucalgary.ca](mailto:damarsha@ucalgary.ca)

3280 Hospital Drive NW, Calgary, Alberta, T2N 4Z6

Jeff K. Vallance

[jeffv@athabascau.ca](mailto:jeffv@athabascau.ca)

1 University Drive, Athabasca, Alberta, T9S 3A3

Yasmin Nasser

[ynasser@ucalgary.ca](mailto:ynasser@ucalgary.ca)

3330 Hospital Drive NW Calgary, AB T2N 4N1

Vidya Rajagopalan

[vidya.rajagopalan@ucalgary.ca](mailto:vidya.rajagopalan@ucalgary.ca)

3280 Hospital Drive NW, Calgary, Alberta, T2N 4Z6

Gail MacKean

[glmackea@ucalgary.ca](mailto:glmackea@ucalgary.ca)

3280 Hospital Drive NW, Calgary, Alberta, T2N 4Z6

## MEDITATION AND YOGA FOR IBS

Maitreyi Raman

[mkothand@ucalgary.ca](mailto:mkothand@ucalgary.ca)

3280 Hospital Drive NW, Calgary, Alberta, T2N 4Z6

Corresponding Author:

Dr. Maitreyi Raman

6D33 TRW Building

3280 Hospital Drive NW

Calgary, AB, T2N 4N1, Canada

Email: [mkothand@ucalgary.ca](mailto:mkothand@ucalgary.ca)

For peer review only

## MEDITATION AND YOGA FOR IBS

**Abstract**

**Introduction:** When delivered in person, yoga has been shown to be effective in managing Irritable Bowel Syndrome (IBS) symptoms. Research is needed to test the feasibility and effectiveness of yoga as a therapeutic option when delivered virtually. The primary aim of the Mind and Yoga for IBS (MY-IBS) randomized controlled trial is to determine the effects of an eight-week virtual meditation and yoga intervention on IBS symptom severity compared with an advice-only active control group.

**Methods and analysis:** Adults diagnosed with IBS will be randomized to receive either a Upa yoga intervention or an advice-only control group. The intervention will consist of weekly online classes for eight weeks delivered by a facilitator using Microsoft Office Teams and daily home practice. Feasibility will be evaluated by examining recruitment and attrition rates, adherence, participant satisfaction with the program, and safety. The primary outcome is IBS symptom severity, and key secondary outcomes include (but not limited to) quality of life, anxiety and depression symptoms, COVID-19 related stress and anxiety, and fatigue. Outcomes will be assessed at baseline, four weeks, and eight weeks. An embedded design experimental model sub-study will be conducted post-intervention using qualitative research methods to identify participants' experiences in the yoga program.

**Ethics and dissemination:** This study has been approved by the Conjoint Health Research Ethics Board (REB ID 20-0084). Findings will be disseminated through peer-reviewed publication, conference presentation, and social media.

**Trial registration number:** NCT04302623

**Strengths and limitations:**

- Mixed methods study composed of a RCT and interviews
- First virtual yoga interventions in irritable bowel syndrome
- Canada-wide recruitment
- Self-reported outcome measures
- Lack of data capture on the frequency of yoga practice in the control group

## MEDITATION AND YOGA FOR IBS

**Introduction**

Stress is a physical, mental, or emotional response that causes tension in the mind or the body<sup>1</sup>. Altered stress response from psychological and physiological mechanisms may contribute to altered brain-gut signaling patterns and IBS symptoms. Psychological stressors, such as depression and anxiety, may influence gut function (e.g., reduced motility). Physiological stressors (e.g., infection) in the gut may affect the brain<sup>2</sup>. Therapies focusing on mind-body interactions and stress reduction may be adjunctive treatments for IBS. Stress management techniques that include both mind and body interventions such as yoga<sup>3</sup> have been effective in improving IBS symptom severity and mental health outcomes<sup>3 4</sup>. Mind-body interventions may modulate the brain-gut axis directly by reducing sympathetic activity and increasing parasympathetic activity and the hypothalamus-pituitary-adrenal axis<sup>5</sup>.

Yoga is a traditional *mind-body-breath* discipline that includes a triad of postures, structured breathing, and meditation<sup>6</sup>. Our recent review<sup>7</sup> identified four randomized controlled trials that examined traditional yoga practice as therapy for IBS patients<sup>8-11</sup>. These trials demonstrated yoga was more effective compared to pharmacological treatment and equally effective as dietary interventions or moderate-intensity walking. Physical and mental health improvements included IBS symptom severity, gastric motility, and depression.

Research is needed to determine the feasibility and effectiveness of virtual yoga programming as a therapeutic option for patients with IBS. The rationale for virtually delivered interventions to manage IBS is increasing due to rising demand, limited healthcare resources, and cost-effectiveness<sup>12 13</sup>. A recent review found virtual care tools may be effective in managing disease activity and improving outcomes in patients with digestive diseases<sup>14</sup>. This review also highlighted the high acceptability and satisfaction with virtual care among patients with IBS<sup>15-19</sup>.

## MEDITATION AND YOGA FOR IBS

The primary objective of the MY-IBS (Meditation and Yoga for Irritable Bowel Syndrome) study is to explore the feasibility and effectiveness of a virtual yoga program for patients with IBS. MY-IBS is a mixed-methods study including a randomized controlled trial and semi-structured interviews. The primary aim of this randomized controlled trial is to determine the effects of an eight-week virtual yoga intervention on IBS symptom severity, measured with the IBS Symptoms Severity Scale, compared to an advice-only control group. Secondary aims are to determine whether a) a yoga program delivered virtually is feasible for adults with IBS, b) improves health outcomes including quality of life, stress, and fatigue, and c) improves mental health outcomes including depression and anxiety symptoms. An embedded design experimental model qualitative sub-study using semi-structured interviews will explore and describe participants' experiences in the yoga program, and its impact. We hypothesize that the program will be feasible and effective in improving outcomes in the intervention group compared to the control group.

### Methods and Analysis

#### Study design overview

The quantitative study is a superiority randomized non-blinded two-group controlled trial. The qualitative study will use semi-structured interviews and thematic analysis to explore and describe intervention participant experiences and views of the yoga program.

#### Patient involvement

## MEDITATION AND YOGA FOR IBS

1  
2  
3 Patients with lived experience were involved in the conduct of this study. During the  
4 development stage, patient partners were invited to participate in a series of discussions with the  
5 research team to define the study research question, study design, choice of outcome measures,  
6 and methods of recruitment. Following the completion of the trial, the patient partners will be  
7 involved in the dissemination of this research.  
8  
9  
10  
11  
12  
13

### **Sample and selection**

14  
15  
16  
17 The MY-IBS stud will be conducted at the University of Calgary in Alberta, Canada  
18 starting March 2021 and ending early 2022. To be eligible in this study, participants must be  
19 diagnosed with IBS based on Rome IV criteria by a health care professional (e.g., physician,  
20 nurse, dietician), be 18-70 years old, have an adequate understanding of English, have an ability  
21 to provide written informed consent, score at least 75 out 500 points on the IBS Symptoms  
22 Severity Scale indicating mild IBS symptoms, and be on stable doses of medications for IBS  
23 (including anti-depressants) without major changes to diet or physical activity levels for at least  
24 eight weeks prior to starting the intervention. Individuals across Canada are eligible to  
25 participate. Exclusion criteria include a major physical impairment that would prevent the  
26 individual from doing yoga determined by either the patient or the study coordinator, and  
27 diagnosis of any major cognitive, psychological, or psychiatric disorder (e.g., major depression,  
28 schizophrenia) as identified by the treating physician or healthcare practitioner or screened by  
29 the study coordinator using the Patient Health Questionnaire-9.  
30  
31  
32  
33  
34  
35  
36  
37  
38  
39  
40  
41  
42  
43  
44  
45  
46

47 Participants will be identified through (a) gastroenterology clinics across Calgary,  
48 Alberta; (b) gastroenterologists across Canada who indicated interest in this study for their IBS  
49 patients in a previous survey conducted by our team (not published); (c) participants from the  
50 previous survey who indicated interest in this study and have given consent to be contacted; (d)  
51  
52  
53  
54  
55  
56  
57

## MEDITATION AND YOGA FOR IBS

1  
2  
3 through social media; (e) self-referrals through the study website and the University of Calgary  
4 participate in research portal; (f) Canadian Association of Gastroenterologists monthly  
5 newsletter; and (g) participants with IBS who are enrolled in the IMAGINE (Inflammation,  
6  
7 Microbiome and Alimentation Gastro-intestinal and Neuropsychiatric Effects) cohort study at the  
8 University of Calgary and have given their consent to be contacted for future studies.  
9  
10  
11  
12  
13

14  
15 Participant screening will use the Patient Health Questionnaire-9 (PHQ-9). Individuals  
16 who score 20 points or higher on the PHQ-9 indicating severe depression will not be eligible to  
17 participate. Reasons for exclusion are lack of compliance in interventional studies among these  
18 individuals, potential heterogeneity in the small sample size of participants, and skewed results if  
19 patients seek treatment for their depression during the trial.  
20  
21  
22  
23  
24  
25

### **Interventions**

#### **Yoga intervention group**

26  
27  
28  
29  
30  
31 Before their first class, the intervention group will receive an introductory video. The  
32 video will consist of information on IBS, information on the style of yoga they will be learning,  
33 and rationale for yoga as a treatment for IBS. The intervention will be delivered online by a  
34 certified yoga facilitator in class sizes of less than ten participants using the Microsoft Office  
35 Teams platform. Classes will be held once per week for the eight-week duration. The first  
36 session will be approximately 90 minutes and subsequent sessions up to 60 minutes. The  
37 introductory session will include the class setup, introductions, teaching poses, corrections, and  
38 a question and answers period. The yoga facilitator will provide participants with modifications  
39 for common challenges to support best practices and ensure safety. Subsequent classes will  
40 include a review from the previous week, a question and answer period, individual corrections  
41 and modifications, and introduce new practices. In addition to the online class component, study  
42  
43  
44  
45  
46  
47  
48  
49  
50  
51  
52  
53  
54  
55  
56  
57  
58  
59  
60



## MEDITATION AND YOGA FOR IBS

1  
2  
3 staff will ask participants to practice the yoga program at home every day. They will also have  
4  
5 access to the yoga videos, written program instructions, and frequently answered questions  
6  
7 accessible through the study website to help support their home practice  
8  
9  
10 (<https://cumming.ucalgary.ca/research/ascend/resources/patient-resources/my-ibs>).

11  
12 Upa Yoga, developed by the Isha Foundation of Inner Sciences  
13  
14 (<https://isha.sadhguru.org/us/en>), will be promoted. Upa Yoga maintains the ancient principles  
15  
16 of Hatha Yoga and will be delivered by a certified yoga facilitator from the Isha Foundation.  
17  
18 The Upa Yoga program will consist of (a) directional movements and neck rotations, (b) hatha  
19  
20 yoga-based Yoga Namaskar, (c) breathing practices or alternate nostril breathing, (d) mantra  
21  
22 meditation consisting of AUM chanting (OM), and e) breath watching. Table 1 shows a  
23  
24 description of the program and rationale. Our published prospective study examining the  
25  
26 effectiveness of Upa Yoga in patients with Inflammatory Bowel Disease<sup>20</sup> shows improvements  
27  
28 in mental health scores after an eight-week yoga program.  
29  
30  
31

### **Advice-only control group**

32  
33  
34  
35 Control participants will receive a video including general education on IBS, the mind-  
36  
37 gut connection in IBS, and the role of mind-body therapies in the management of IBS. These  
38  
39 participants will also receive a list of IBS-related resources from the Canadian Digestive Health  
40  
41 Foundation, a link to an IBS patient support group ([www.ibspatient.org](http://www.ibspatient.org)), and information about  
42  
43 physical activity guidelines from the World Health Organization. Control participants will be  
44  
45 eligible to attend a two-week yoga program and receive the yoga videos eight weeks from the  
46  
47 time of enrolment. Data on these participants will not be collected as this participation option is  
48  
49 for participants who desire to receive the yoga sessions outside of the study.  
50  
51  
52

### **Outcome measures**

## MEDITATION AND YOGA FOR IBS

**Feasibility outcomes**

*Recruitment, attendance, and attrition rates.* Recruitment will be calculated by the percentage of participants who complete the eligibility and enrollment phases of the study. Attrition will be calculated by the percentage of participants who complete all study measures at baseline and eight weeks. A feasible intervention will be defined as class attendance of at least 75 percent (i.e., attendance in six out of eight classes)<sup>9</sup> and attrition rate of less than 30 percent.

*Adherence.* Adherence will be defined as practicing daily yoga for at least 80% of days for eight weeks (or 45 out of 56 days minimum). Each week a practice log will be provided to monitor frequency and length of yoga. The yoga facilitator will take attendance during each online class. To increase program adherence, the study coordinator will email intervention participants weekly. Six months following the completion of the intervention, participants will be asked to report the average frequency (i.e., days per month) and duration (i.e., minutes) of their yoga practices over the last seven days to evaluate long-term maintenance.

*Program satisfaction.* Intervention participants will complete a survey regarding overall satisfaction with their program, including satisfaction with videos and online class instruction. Videos and online classes will be deemed acceptable if at least 70% of participants are at least satisfied (i.e., rank classes as either good, great, or excellent). Participants will also indicate whether they would recommend the program to others on a scale from 1 (strongly disagree) to 7 (strongly agree) and provide feedback on how the program could be improved.

*Assessment of harms.* The study coordinator will screen potential participants and exclude those with any physical problems that may limit participation with yoga postures. Participants will be asked to report any adverse events experienced during the study period.

## MEDITATION AND YOGA FOR IBS

Participants with adverse events (e.g., injury resulting from the program) will be advised to consult their physician to provide care as appropriate.

**Effectiveness outcomes**

The primary outcome, IBS symptoms, will be measured using the *IBS-Symptom Severity Scale (IBS-SSS)*. The IBS-SSS is a five-question survey that asks the severity of abdominal pain, frequency of abdominal pain, severity of abdominal distention, dissatisfaction with bowel habits, and interference with QOL over the past 10 days. Scores on the IBS-SSS range from 0 to 500 with higher scores indicating more severe symptoms. Participants can be categorized as having mild (75-175), moderate (175-300), or severe (>300) IBS. Symptom reduction of at least 50 points is considered clinically meaningful.

Secondary outcomes (*and their measures*) include quality of life (*IBS-Quality of life*), anxiety (*Generalized Anxiety Disorder-7*), depression (*Patient Health Questionnaire-9*), stress (*Perceived Stress Scale*), COVID-19 stress (*COVID-19 Stress Scale*), fatigue (*Modified Fatigue Impact Scale-21*), somatic Symptoms (*Patient Health Questionnaire-15*), and self-compassion (*Self Compassion Scale-Short Form*) (Supplementary Table 1). Intention to practice yoga will also be assessed. The intervention and control groups will be assessed on effectiveness outcomes

## MEDITATION AND YOGA FOR IBS

at baseline, four, and eight weeks. The intervention group will complete measures of effectiveness outcomes six months after the intervention.

### **Sample size**

We will recruit twenty-five participants per group. However, assuming 30% attrition rate, we will aim to recruit 33 participants per group. Symptom reduction of at least 50 points is considered clinically meaningful, however a group difference has been shown to represent a considerable self-reported improvement<sup>21</sup>. We calculated the sample size using a mean difference of at least 83 points on the IBS-SSS ( $\alpha=0.05$ ,  $\beta=0.80$ , standard deviation of 103.8)<sup>9</sup>.

### **Randomization, treatment allocation, and blinding**

Study flow is shown in Figure 1. The study coordinator will obtain consent from participants who will then be enrolled in the study. Participants will be randomized after baseline assessment to either the yoga intervention or the advice-only control group. A statistician blinded to the randomization key will create a computer-generated REDCap randomized sequence to allocate participants based on gender (1:1:1 male:female:other) and depression (1:1 depression:no depression). Participants will be aware of the group to which they are allocated, however, the principal investigator and data analyst will remain blinded to the randomization process.

### **Data management**

All quantitative data will be entered into a secure REDCap database at the University of Calgary. Effectiveness outcome measures, program satisfaction, attendance, and adherence will be entered by the participants. Recruitment, attrition, and safety will be recorded by the study coordinator who is not blinded to the randomization. After the study, data will be downloaded, and patient identifiers will be removed from the data file. Data will be stored in a password-

## MEDITATION AND YOGA FOR IBS

protected file on a University of Calgary password protected computer. The interviews will be transcribed, deidentified, and uploaded to the University of Calgary's secure SharePoint site.

Only the research team will have access to the data.

### **Statistical analysis**

Descriptive analysis will summarize participant characteristics and feasibility outcomes. Univariate analysis of variance (ANOVA) will examine baseline differences between groups for variables with continuous data. Chi-square tests will examine baseline differences between groups for categorical variables. Unadjusted ANOVA and adjusted analysis of covariance (ANCOVA) models will compare differences in scores from baseline and post-intervention data within and between groups using intent to treat and per protocol analysis. A logistic regression – model examining determinants of responders (a minimum improvement of at least 50 points on the IBS-SSS scale) versus non-responders will be developed to predict a response to the intervention. This model will consider practice in minutes, baseline depression, anxiety, and IBS symptom severity scores. An  $\alpha$  of 0.05 will be the threshold for determining statistical significance. If the frequency of missing data is >5%, we will perform additional analyses using imputation methods. Analysis will be conducted using SPSS version 26.

### **Post-intervention interviews**

Participants who were randomized to the intervention and did not withdraw from the study will be invited by email to participate in an interview. We aim to recruit men and women and have equal representation of those who benefited from the program (i.e., experienced improvements in their IBS symptom severity) as well as individuals who did not. We anticipate needing to interview between 10 and 15 participants to reach both code and meaning saturation<sup>22</sup> aiming for a maximum variation sample.

## MEDITATION AND YOGA FOR IBS

1  
2  
3           Semi-structured interviews will capture participants' experiences, program satisfaction,  
4  
5 facilitators and barriers to participation, perceptions of social support and supervised learning,  
6  
7 perceived impact on IBS symptoms and overall physical and mental health, and input on  
8  
9 improving future programming (Table 2). Interviews will happen virtually using Microsoft  
10  
11 Office Teams and be approximately 30 to 45 minutes in length. The study coordinator will  
12  
13 interview the participants, take notes during the interview, and reflect following each interview.  
14  
15 Interview recordings will be transcribed verbatim without identifying information. Data will be  
16  
17 coded and analyzed in duplicate using NVivo 12. Thematic analysis inductively reveals patterns  
18  
19 and themes providing an understanding of participant experiences, with the program and their  
20  
21 perspectives on its impact. Thematic analysis is a method for systematically identifying,  
22  
23 organizing, and offering insight into patterns of meaning (themes) across a data set <sup>23</sup>. This  
24  
25 method makes sense of shared meanings and experiences that allows the researcher to identify  
26  
27 what data is important to the research question <sup>24</sup>.  
28  
29  
30  
31  
32  
33  
34

### Discussion

35  
36  
37           The MY-IBS study aims to determine the feasibility and effectiveness of an eight-week  
38  
39 virtual yoga and meditation program combined with home-based practice for patients with IBS.  
40  
41 Determining feasibility will be based on study recruitment, adherence, safety, and program  
42  
43 satisfaction. Improved IBS symptom management (the primary outcome) will determine  
44  
45 intervention effectiveness. Secondary outcomes include quality of life, stress, fatigue,  
46  
47 depression, anxiety, COVID-19-related stress and anxiety, and self-compassion. These findings  
48  
49 will inform potential predictors of responders versus non-responders. Predictors may be  
50  
51 considered in clinical practice to target the IBS patients most likely to benefit from the yoga  
52  
53  
54  
55  
56  
57  
58  
59  
60

## MEDITATION AND YOGA FOR IBS

1  
2  
3 intervention. Interview themes and patterns will refine and inform the development of future  
4  
5 virtual yoga programming designed for IBS patients.  
6

7  
8 To our knowledge, there are no studies of virtual yoga and meditation in the IBS  
9  
10 population. The findings from this study may have implications for the management of IBS. The  
11  
12 virtual delivery of yoga represents an opportunity to increase access to effective management  
13  
14 therapies for patients with IBS. The COVID-19 pandemic has called for the reorganization of  
15  
16 health care including utilization of virtual care. Nearly 90% of care in the United States has been  
17  
18 delivered virtually since the pandemic<sup>25</sup>. Due to the COVID-19 pandemic, there is increased  
19  
20 psychological distress and gastrointestinal symptoms among individuals with IBS<sup>26 27</sup> compared  
21  
22 to individuals without IBS<sup>28</sup>. The present study offers a unique opportunity to examine  
23  
24 prospectively the feasibility and effectiveness of a yoga and meditation program delivered  
25  
26 virtually to individuals living with IBS with the COVID-19 pandemic restrictions taken into  
27  
28 consideration. Study findings may aid in developing interventions and services tailored to  
29  
30 patients with IBS. New insight into outcomes will be beneficial for healthcare leaders in  
31  
32 planning how to allocate existing resources to support these services and potentially lessen the  
33  
34 burden of IBS on both the individual and the health care system.  
35  
36  
37  
38  
39  
40  
41

### **Ethics and dissemination**

#### **Ethics**

42  
43  
44 The study protocol, informed consent form, and other study documents were reviewed  
45  
46 and approved by the University of Calgary's ethics board. All protocol modifications will be  
47  
48 submitted for review and approval by the ethics board. The trial participants will be informed of  
49  
50 any modifications, and re-consented by the study coordinator, if required. Further, the trial  
51  
52 registry for this study will be updated.  
53  
54  
55  
56  
57

## MEDITATION AND YOGA FOR IBS

1  
2  
3 Participation is voluntary and will not influence standard clinical care. All participants  
4 will provide informed written consent and have the right to withdraw from the study at any time.  
5  
6 Pending consent from the participant, all data collected up to the time of withdrawal will be used  
7  
8 in the final data analyses as advised by the CONSORT guidelines <sup>29</sup>.  
9  
10

### **Dissemination**

11  
12  
13  
14 Our targeted knowledge users and audiences will include researchers, healthcare  
15 professionals and service providers, persons with lived experiences, community groups, and  
16 professional organizations (e.g., Canadian Association of Gastroenterology). Our goal will be to  
17 increase topic area knowledge among these groups and inform future research. Our strategies  
18 will include conference presentations, publication in a peer reviewed journal, social media  
19 campaigns, development of virtually delivered tools such as mobile applications to increase  
20 accessibility and affordability and educational material distributed through the Digestive Health  
21 Foundation, IMAGINE SPOR Chronic Disease Network, and Primary Care Networks across  
22 Alberta.  
23  
24  
25  
26  
27  
28  
29  
30  
31  
32  
33  
34  
35  
36  
37  
38  
39  
40  
41  
42  
43  
44  
45  
46  
47  
48  
49  
50  
51  
52  
53  
54  
55  
56  
57  
58  
59  
60



## MEDITATION AND YOGA FOR IBS

Table 1. Overview of the Upa Yoga program.

| Program Component                       | Description                                                                                                                                                                                                   | Rationale                                                                                                                                                                                                                                                                                                                                                                                                                                                                                                                                             |
|-----------------------------------------|---------------------------------------------------------------------------------------------------------------------------------------------------------------------------------------------------------------|-------------------------------------------------------------------------------------------------------------------------------------------------------------------------------------------------------------------------------------------------------------------------------------------------------------------------------------------------------------------------------------------------------------------------------------------------------------------------------------------------------------------------------------------------------|
| <i>Directional Movement of the Arms</i> | This practice involves extending the arms in four directions (sideways, front, up and down) by rotating the wrists, while consciously focusing on the inhalation and exhalation of breath with each movement. | Studies show that fibromyalgia is common among patients living with IBS <sup>30</sup> . This could lead to pain of the muscles and joints, fatigue, and sleep concerns. The principle behind this practice is to lubricate the fluids in the joints, increase circulation and activate the energy nodes in these joints. Doing these practices everyday can relieve muscle and joint stiffness and reduce pain over time. This practice is recommended by the Isha Foundation to increase strengths and flexibility in preparation for Yoga Namaskar. |
| <i>Neck Practices</i>                   | There are five sets of neck practices, each stretching the neck and final one working on the shoulder area.                                                                                                   | The main cause of neck pain is usually muscle tension. Perceived stress can increase muscle tension. These neck exercises help relieve stress that can aggravate IBS symptoms. This practice is recommended by the Isha Foundation to increase strengths and flexibility in preparation for Yoga Namaskar.                                                                                                                                                                                                                                            |
| <i>Yoga Namaskar</i>                    | This practice involves a series of seven consecutive steps of upper body stretching and squatting, aligned with breath.                                                                                       | This practice activates the lumbar region of the spine and strengthens the spinal muscles <sup>31</sup> . While Yoga Namaskar has not been specifically studied in patients with IBS, yoga squatting postures have been associated with significant decrease in depression among nine individuals with IBD <sup>20</sup> and anxiety in a randomized self as control study in 30 healthy subjects <sup>32</sup> .                                                                                                                                     |
| <i>Alternate Nostril</i>                | The participant sits cross-legged with the spine comfortably erect and eyes closed. Closing the right nostril with the thumb,                                                                                 | Alternate nostril breathing is traditionally considered to alleviate mental unrest and                                                                                                                                                                                                                                                                                                                                                                                                                                                                |

## MEDITATION AND YOGA FOR IBS

|                                         |                                                                                                                                                                                                                                                                                                                                                                                     |                                                                                                                                                                                                                                                                                                        |
|-----------------------------------------|-------------------------------------------------------------------------------------------------------------------------------------------------------------------------------------------------------------------------------------------------------------------------------------------------------------------------------------------------------------------------------------|--------------------------------------------------------------------------------------------------------------------------------------------------------------------------------------------------------------------------------------------------------------------------------------------------------|
| <i>Breathing (Nadi Shuddhi)</i>         | inhaling and exhaling through the left nostril. This is repeated on the right nostril by closing the left nostril with the ring finger.                                                                                                                                                                                                                                             | promote physical and mental balance. <sup>33 34</sup> It has been demonstrated to decrease perceived stress and improve autonomic function in a randomized control trial compared to control subjects in healthy male volunteers, and decreased state anxiety in a prospective study. <sup>35 36</sup> |
| <i>Mantra Meditation (AUM chanting)</i> | The participants sit cross-legged, and with eyes closed, uttering each of these 3 sounds 7 times. The important aspect to this utterance is the awareness of the reverberations each of the sounds produces in the corresponding parts of the body: a - below the navel, o - mid-point of the chest, m - pit of the throat.                                                         | This mantra is thought to facilitate energy flow, and through vibratory mechanisms, creates peace and harmony leading to increased mental alertness and may improve symptoms of depression. <sup>37 38</sup>                                                                                           |
| <i>Breath watching</i>                  | The participants sit cross-legged with eyes closed and hold a hand gesture called the Yoga Mudra (the tips of the thumb and index finger come together forming a circle). They are instructed to maintain a gentle focus on the mid-point between both eyebrows (at the level of the pineal gland), while being conscious of the gentle movement of breath happening in their body. | Breathing in a focused manner can be used as a tool to promote positive changes to the mind, body and emotions. <sup>39</sup> Significant reduction in the level of state anxiety was found in a group of healthy male volunteers when they practiced breath awareness. <sup>16</sup>                  |

## MEDITATION AND YOGA FOR IBS

Table 2. Semi-structured interview questions and probes.

1. **What have you done in the past to manage your IBS?**
  - a. Have you tried yoga or mediation?
  - b. Have you tried exercise?
  
2. **I would like to start by asking you what you were hoping for or expecting from the program?**
  - a. Why did you join this study?
  - b. Did anyone influence your decision to join?
  - c. Did that meet your expectations?
  
3. **Next, I would like to discuss your overall experience in the MY-IBS yoga program in which you participated. Could you describe for me what participating in this program was like for you?**
  - a. What did you like most about it?
  - b. What didn't you like?
  - c. Did this change over the course of the program?

**Sub-questions:** *yoga facilitator/supervision, the timing of sessions/scheduling, length of sessions, attending with other members, online experience versus in-person, social support/other participants.*

  - d. What was that like?
  - e. What stood out for you?
  - f. What emotions were you aware of at the time?
  - g. What else do you remember about that experience?
  
4. **How has participating in this program affected how you manage or live with your IBS?**

**Sub-questions:** *change in IBS symptoms; physical health, fatigue; mental health - stress, anxiety, depression; feeling better about myself; ability to live with my IBS.*

  - a. Tell me more about that.
  - b. Can you give me an example of what you mean?
  - c. How has that affected you?
  
5. **What, if anything, has helped you to do your practices at home?**

**Sub-questions:** *social support, family support, convenience*

  - a. Tell me more about that.
  - b. Can you give me an example of what you mean?
  - c. How has that affected you?
  
6. **What challenges did you have, if any, doing your practices at home?**

**Sub-questions:** *family, supervision/safety, schedule/time*

  - a. Are you satisfied with how you did?
  - b. Tell me more about that.

## MEDITATION AND YOGA FOR IBS

- 1  
2  
3 c. Can you give me an example of what you mean?  
4 d. How has that affected you?  
5  
6  
7 **7. What, if anything, has helped you to attend the weekly online class?**  
8 **Sub-questions:** *social support, family support, HCP support, yoga facilitator,*  
9 *supervision/safety, online classes, schedule/length*  
10 a. Tell me more about that.  
11 b. Can you give me an example of what you mean?  
12 c. How has that affected you?  
13  
14  
15  
16 **8. What challenges did you have, if any, to attend the weekly online class?**  
17 **Sub-questions:** *social support, family, yoga facilitator, supervision/safety, online*  
18 *classes, schedule, technical difficulties*  
19 a. Are you satisfied with how you did?  
20 b. Tell me more about that.  
21 c. Can you give me an example of what you mean?  
22 d. How has that affected you?  
23  
24  
25  
26  
27 **9. We are interested in any ideas you have about how we might make this program**  
28 **better. What could we do differently?**  
29 **Sub-questions:** *content, timing, facilitator, videos, website, delivery, other supports*  
30 a. Would you explain that further?  
31 b. Can you give me an example of what you mean?  
32  
33  
34 **10. Based on your experience with yoga, would you incorporate yoga to help manage**  
35 **your IBS? If so, how?**  
36  
37  
38 **11. Before we conclude, is this anything else you would like to say about your**  
39 **experience with this program, that we haven't had a chance to talk about yet?**  
40  
41  
42  
43  
44  
45  
46  
47  
48  
49  
50  
51  
52  
53  
54  
55  
56  
57  
58  
59  
60

## MEDITATION AND YOGA FOR IBS

**Strengths and limitations of this study:**

- Mixed methods study composed of a trial and interviews
- First virtual yoga intervention in Irritable Bowel Syndrome
- Canada-wide recruitment
- Self-reported outcome measures
- Lack of data capture on frequency of yoga practice in the control group

**Authors' contributions:** State how each author was involved in writing the protocol.

AD is involved in all aspects of protocol design and lead author of the manuscript. DM, JKV, YN, VR, and GM assisted with design of the protocol respective to their expertise. DM and GM assisted with the qualitative aspects of the protocol. JKV lead the statistical aspects of the protocol. YN provided their clinical expertise and patient recruitment through the clinic. VR provided their expertise in yoga therapy. MR is the senior author on the protocol and has guided the work of this research to support AD with their training. All authors reviewed the manuscript for study design and provided critical insight into manuscript content and approved the final version for submission.

**Funding statement:** This research received no specific grant from any funding agency in the public, commercial or not-for-profit sectors. DM receives partial salary support through the Arthur J.E. Child Chair.

**Competing interests statement:** None declared.

**Data availability:** Deidentified participant data will be made available upon reasonable request from the study principal investigator.

MEDITATION AND YOGA FOR IBS

1  
2  
3  
4  
5  
6  
7  
8  
9  
10  
11  
12  
13  
14  
15  
16  
17  
18  
19  
20  
21  
22  
23  
24  
25  
26  
27  
28  
29  
30  
31  
32  
33  
34  
35  
36  
37  
38  
39  
40  
41  
42  
43  
44  
45  
46  
47  
48  
49  
50  
51  
52  
53  
54  
55  
56  
57  
58  
59  
60

Figure 1. Participant flowchart based on the CONSORT guidelines.

For peer review only

## MEDITATION AND YOGA FOR IBS

## References

1. Crosswell AD, Lockwood KG. Best practices for stress measurement: How to measure psychological stress in health research. *Health Psychol Open* 2020;7(2):2055102920933072. doi: 10.1177/2055102920933072 [published Online First: 2020/07/25]
2. Mayer EA, Labus JS, Tillisch K, et al. Towards a systems view of IBS. *Nat Rev Gastroenterol Hepatol* 2015;12(10):592-605. doi: 10.1038/nrgastro.2015.121 [published Online First: 2015/08/26]
3. Schumann D, Anheyer D, Lauche R, et al. Effect of Yoga in the Therapy of Irritable Bowel Syndrome: A Systematic Review. *Clin Gastroenterol Hepatol* 2016;14(12):1720-31. doi: 10.1016/j.cgh.2016.04.026 [published Online First: 2016/04/27]
4. Ballou S, Keefer L. Psychological Interventions for Irritable Bowel Syndrome and Inflammatory Bowel Diseases. *Clin Transl Gastroenterol* 2017;8(1):e214. doi: 10.1038/ctg.2016.69 [published Online First: 2017/01/20]
5. Kavuri, Raghuram N, Malamud A, et al. Irritable Bowel Syndrome: Yoga as Remedial Therapy. *Evid Based Complement Alternat Med* 2015;2015:398156. doi: 10.1155/2015/398156 [published Online First: 2015/06/13]
6. Brems C, Colgan D, Freeman H, et al. Elements of yogic practice: Perceptions of students in healthcare programs. *International Journal of Yoga* 2016;9(2):121.
7. D'Silva A, MacQueen G, Nasser Y, et al. Yoga as a Therapy for Irritable Bowel Syndrome. *Dig Dis Sci* 2019 doi: 10.1007/s10620-019-05989-6 [published Online First: 2019/12/14]
8. Taneja I, Deepak KK, Poojary G, et al. Yogic versus conventional treatment in diarrhea-predominant irritable bowel syndrome: A randomized control study. *Applied Psychophysiology and Biofeedback* 2004;29(1):19-33.
9. Kavuri V, Selvan P, Malamud A, et al. Remedial yoga module remarkably improves symptoms in irritable bowel syndrome patients: A 12-week randomized controlled trial. *European Journal of Integrative Medicine* 2015;7(6):595-608. doi: 10.1016/j.eujim.2015.11.001
10. Shahabi L, Naliboff BD, Shapiro D. Self-regulation evaluation of therapeutic yoga and walking for patients with irritable bowel syndrome: a pilot study. *Psychol Health Med* 2016;21(2):176-88. doi: 10.1080/13548506.2015.1051557 [published Online First: 2015/06/19]
11. Schumann D, Langhorst J, Dobos G, et al. Randomised clinical trial: yoga vs a low-FODMAP diet in patients with irritable bowel syndrome. *Aliment Pharmacol Ther* 2018;47(2):203-11. doi: 10.1111/apt.14400 [published Online First: 2017/10/28]
12. Hanlon I, Hewitt C, Bell K, et al. Systematic review with meta-analysis: online psychological interventions for mental and physical health outcomes in gastrointestinal disorders including irritable bowel syndrome and inflammatory bowel disease. *Aliment Pharmacol Ther* 2018;48(3):244-59. doi: 10.1111/apt.14840 [published Online First: 2018/06/15]
13. Knowles SR, Mikocka-Walus A. Utilization and efficacy of internet-based eHealth technology in gastroenterology: a systematic review. *Scand J Gastroenterol* 2014;49(4):387-408. doi: 10.3109/00365521.2013.865259 [published Online First: 2014/02/06]
14. Helsel BC, Williams JE, Lawson K, et al. Telemedicine and Mobile Health Technology Are Effective in the Management of Digestive Diseases: A Systematic Review. *Dig Dis Sci* 2018;63(6):1392-408. doi: 10.1007/s10620-018-5054-z [published Online First: 2018/04/18]
15. Dorn SD, Palsson OS, Woldeghebriel M, et al. Development and pilot testing of an integrated, web-based self-management program for irritable bowel syndrome (IBS). *Neurogastroenterol Motil* 2015;27(1):128-34. doi: 10.1111/nmo.12487 [published Online First: 2014/12/09]
16. Everitt H, Moss-Morris R, Sibelli A, Tapp L, Coleman N, Yardley L, Smith P, Little P. Management of irritable bowel syndrome in primary care: the results of an exploratory randomised controlled

## MEDITATION AND YOGA FOR IBS

- 1  
2  
3 trial of mebeverine, methylcellulose, placebo and a self-management website. *BMC*  
4 *Gastroenterol* 2012;13(68):1-13. doi: <http://www.biomedcentral.com/1471-230X/13/68>  
5  
6 17. Hunt MG, Moshier S, Milonova M. Brief cognitive-behavioral internet therapy for irritable bowel  
7 syndrome. *Behav Res Ther* 2009;47(9):797-802. doi: 10.1016/j.brat.2009.05.002 [published  
8 Online First: 2009/07/03]  
9  
10 18. Ljotsson B, Andersson G, Andersson E, et al. Acceptability, effectiveness, and cost-effectiveness of  
11 internet-based exposure treatment for irritable bowel syndrome in a clinical sample: a  
12 randomized controlled trial. *BMC Gastroenterol* 2011;11:110. doi: 10.1186/1471-230X-11-110  
13 [published Online First: 2011/10/14]  
14  
15 19. Ljotsson B, Falk L, Vesterlund AW, et al. Internet-delivered exposure and mindfulness based therapy  
16 for irritable bowel syndrome--a randomized controlled trial. *Behav Res Ther* 2010;48(6):531-9.  
17 doi: 10.1016/j.brat.2010.03.003 [published Online First: 2010/04/07]  
18  
19 20. Kaur S, D'Silva A, Rajagopalan V, et al. Evaluation of an integrated yoga program in patients with  
20 inflammatory bowel disease: A pilot study. *Explore (NY)* 2021 doi:  
21 10.1016/j.explore.2021.04.006 [published Online First: 2021/07/03]  
22  
23 21. Francis CY, Morris J, Whorwell PJ. The irritable bowel syndrome scoring system: A simple method of  
24 monitoring irritable bowel syndrome and its progress. *Aliment Pharmacol Ther* 1997;11:395-  
25 402.  
26  
27 22. Hennink MM, Kaiser BN, Marconi VC. Code Saturation Versus Meaning Saturation: How Many  
28 Interviews Are Enough? *Qual Health Res* 2017;27(4):591-608. doi: 10.1177/1049732316665344  
29 [published Online First: 2016/09/28]  
30  
31 23. Braun VC, V. Using thematic analysis in psychology. *Qualitative Research in Psychology* 2006;3:77-  
32 101.  
33  
34 24. Braun VC, V. Can I use TA? Should I use TA? Should I not use TA? Comparing reflexive thematic  
35 analysis and other pattern-based qualitative analytic approaches. *Couns Psychother Res*  
36 2021;21:37-47.  
37  
38 25. Kendzerska T, Zhu DT, Gershon AS, et al. The Effects of the Health System Response to the COVID-19  
39 Pandemic on Chronic Disease Management: A Narrative Review. *Risk Manag Healthc Policy*  
40 2021;14:575-84. doi: 10.2147/RMHP.S293471 [published Online First: 2021/02/25]  
41  
42 26. Kamp KJ, Levy RL, Munson SA, et al. Impact of COVID-19 on Individuals With Irritable Bowel  
43 Syndrome and Comorbid Anxiety and/or Depression. *J Clin Gastroenterol* 2021 doi:  
44 10.1097/MCG.0000000000001515 [published Online First: 2021/03/30]  
45  
46 27. Oshima T, Siah KTH, Yoshimoto T, et al. Impacts of the COVID2019 pandemic on functional dyspepsia  
47 and irritable bowel syndrome: A population-based survey. *J Gastroenterol Hepatol* 2020 doi:  
48 10.1111/jgh.15346 [published Online First: 2020/11/17]  
49  
50 28. Sabate JM, Deutsch D, Melchior C, et al. COVID-19 pandemic and lockdown stress consequences in  
51 people with and without Irritable Bowel Syndrome. *Ethics Med Public Health* 2021;18:100660.  
52 doi: 10.1016/j.jemep.2021.100660 [published Online First: 2021/06/22]  
53  
54 29. Moher D, Hopewell S, Schulz KF, et al. CONSORT 2010 Explanation and Elaboration: Updated  
55 guidelines for reporting parallel group randomised trials. *J Clin Epidemiol* 2010;63(8):e1-37. doi:  
56 10.1016/j.jclinepi.2010.03.004 [published Online First: 2010/03/30]  
57  
58 30. Erdrich S, Hawrelak JA, Myers SP, et al. A systematic review of the association between fibromyalgia  
59 and functional gastrointestinal disorders. *Therap Adv Gastroenterol*  
60 2020;13:1756284820977402. doi: 10.1177/1756284820977402 [published Online First:  
2020/12/22]  
31. Vasudev SJ. Benefits of Yoga Namaskar 2021 [Available from: <https://isha.sadhguru.org/ca/en/yoga-meditation/yoga-program-for-beginners/yoga-for-overall-wellbeing2021>.]



## MEDITATION AND YOGA FOR IBS

- 1  
2  
3  
4  
5  
6  
7  
8  
9  
10  
11  
12  
13  
14  
15  
16  
17  
18  
19  
20  
21  
22  
23  
24  
25  
26  
27  
28  
29  
30  
31  
32  
33  
34  
35  
36  
37  
38  
39  
40  
41  
42  
43  
44  
45  
46  
47  
48  
49  
50  
51  
52  
53  
54  
55  
56  
57  
58  
59  
60
32. Chandrasekeran A, Rajesh SK., Srinivasan TM. Effect of repetitive yogic squats with specific hand position (Thoppukaranam) on selective attention and psychological states. *International Journal of Yoga* 2014;7(1):76-79. doi: 10.4103/0973-6131.123497
33. Cramer H, Lauche R, Klose P, et al. Yoga for schizophrenia: a systematic review and meta-analysis. *BMC Psychiatry* 2013;13:32. doi: 10.1186/1471-244X-13-32 [published Online First: 2013/01/18]
34. Saraswati S. M S, S.S. Hatha yoga Pradipika. Munger, India, Bihar: Bihar School of Yoga 1985.
35. Naik GS, Gaur GS, Pal GK. Effect of Modified Slow Breathing Exercise on Perceived Stress and Basal Cardiovascular Parameters. *Int J Yoga* 2018;11(1):53-58. doi: 10.4103/ijoy.IJOY\_41\_16
36. Telles S, Vishwakarma B, Gupta RK, et al. Changes in Shape and Size Discrimination and State Anxiety After Alternate-Nostril Yoga Breathing and Breath Awareness in One Session Each. *Med Sci Monit Basic Res* 2019;25:121-27. doi: 10.12659/MSMBR.914956 [published Online First: 2019/04/22]
37. Telles S, Nagarathna R, Nagendra HR. Autonomic changes during "OM" meditation. *Indian J Physiol Pharmacol* 1995;39(4):418-20.
38. Rao NP, Deshpande G, Gangadhar KB, et al. Directional brain networks underlying OM chanting. *Asian J Psychiatr* 2018;37:20-25. doi: 10.1016/j.ajp.2018.08.001 [published Online First: 2018/08/03]
39. Arch JJ, Craske MG. Mechanisms of mindfulness: emotion regulation following a focused breathing induction. *Behav Res Ther* 2006;44(12):1849-58. doi: 10.1016/j.brat.2005.12.007 [published Online First: 2006/02/07]

1  
2  
3  
4  
5  
6  
7  
8  
9  
10  
11  
12  
13  
14  
15  
16  
17  
18  
19  
20  
21  
22  
23  
24  
25  
26  
27  
28  
29  
30  
31  
32  
33  
34  
35  
36  
37  
38  
39  
40  
41  
42  
43  
44  
45  
46  
47  
48  
49  
50  
51  
52  
53  
54  
55  
56  
57  
58  
59  
60



169x114mm (96 x 96 DPI)

Supplementary Table 1. Effectiveness outcomes measures.

| Measure                                     | Description                                                                                                                                                                                                                                                                                                                                                                                                                                                                                                                                                 | Scoring                                                                                                                                                                                                                                                                                                                                                                                                                                                                                                      | Assessments |         |         |
|---------------------------------------------|-------------------------------------------------------------------------------------------------------------------------------------------------------------------------------------------------------------------------------------------------------------------------------------------------------------------------------------------------------------------------------------------------------------------------------------------------------------------------------------------------------------------------------------------------------------|--------------------------------------------------------------------------------------------------------------------------------------------------------------------------------------------------------------------------------------------------------------------------------------------------------------------------------------------------------------------------------------------------------------------------------------------------------------------------------------------------------------|-------------|---------|---------|
|                                             |                                                                                                                                                                                                                                                                                                                                                                                                                                                                                                                                                             |                                                                                                                                                                                                                                                                                                                                                                                                                                                                                                              | Baseline    | 4 weeks | 8 weeks |
| <b>Primary outcome</b>                      |                                                                                                                                                                                                                                                                                                                                                                                                                                                                                                                                                             |                                                                                                                                                                                                                                                                                                                                                                                                                                                                                                              |             |         |         |
| <i>IBS-Symptom Severity Scale (IBS-SSS)</i> | The IBS-SSS is a five-question survey that asks the severity of abdominal pain, frequency of abdominal pain, severity of abdominal distention, dissatisfaction with bowel habits, and interference with QOL over the past 10 days. Subjects respond to each question on a 100-point visual analogue scale <sup>22</sup> . The IBS-SSS scale is the most frequently used severity measure for evaluating IBS severity and is commonly used as an outcome measure in clinical trials because it is highly responsive to change with treatment <sup>22</sup> . | Scores on the IBS-SSS range from 0 to 500 with higher scores indicating more severe symptoms. Participants can be categorized as having mild (75-175), moderate (175-300), or severe (>300) IBS.<br><br>Symptom reduction of at least 50 points is considered clinically meaningful; however, the primary endpoint will be the proportion of participants in each group who demonstrate a symptom reduction of 83 points or more, based on the variables used in the sample size calculation <sup>22</sup> . | ✓           | ✓       | ✓       |
| <b>Secondary outcomes</b>                   |                                                                                                                                                                                                                                                                                                                                                                                                                                                                                                                                                             |                                                                                                                                                                                                                                                                                                                                                                                                                                                                                                              |             |         |         |
| <i>IBS-Quality of life (IBS-QOL)</i>        | The IBS-QOL is a 34-item questionnaire that assesses the degree to which IBS interfered with QOL over the past 30 days. Each item is rated on a 1 to 5 Likert scale, with higher values indicating a lower QOL <sup>25</sup> . The IBS-QOL is currently the most validated and highly responsive self-reported QOL measure specific to IBS that can be used to assess the impact of IBS and its treatment <sup>25</sup> .                                                                                                                                   | The individual responses to the 34 items are summed and averaged for a total score and then transformed to a 0-100 scale for ease of interpretation with higher scores indicating better IBS specific QOL <sup>25</sup> .<br><br>An increment of at least 14 points on the IBS-QOL scale from baseline will demonstrate efficacy.                                                                                                                                                                            | ✓           | ✓       | ✓       |
| <i>Generalized Anxiety Disorder (GAD-7)</i> | GAD-7 is seven items, score from 0 (not at all) to 3 (nearly every day), providing a severity score between 0-21. Scores of 5, 10, and 15 represent cut points for                                                                                                                                                                                                                                                                                                                                                                                          | A 5-point change on the GAD-7 is considered clinically significant.                                                                                                                                                                                                                                                                                                                                                                                                                                          | ✓           | ✓       | ✓       |

|                                              |                                                                                                                                                                                                                                                                                                                                              |                                                                         |   |   |   |
|----------------------------------------------|----------------------------------------------------------------------------------------------------------------------------------------------------------------------------------------------------------------------------------------------------------------------------------------------------------------------------------------------|-------------------------------------------------------------------------|---|---|---|
|                                              | mild, moderate, and severe anxiety. The GAD-7 also is effective at identifying the presence of other anxiety disorders including panic disorder, social anxiety disorder, and post-traumatic stress disorder <sup>26</sup> .                                                                                                                 |                                                                         |   |   |   |
| <i>Physical Health Questionnaire (PHQ-9)</i> | The PHQ-9 is a 9-item survey with each item scored from 0 (not at all) to 3 (nearly every day) totalling from 0 to 27 points. Scores of 5, 10, 15, and 20 represent cut points for mild, moderate, moderately severe and severe depression. The PHQ assesses major depressive disorder, panic disorder, and anxiety disorder <sup>27</sup> . | A 5-point change is considered clinically significant.                  | ✓ | ✓ | ✓ |
| <i>Perceived Stress Scale (PSS)</i>          | The PSS is a 14-item survey that measures perceived stress, or the degree to which situations in one's life are appraised as stressful, on a four-point scale (0=never, 4=very often) over the last 30 days. The PSS is the most widely used psychological instrument for measuring the perception of stress <sup>29</sup> .                 | An 11-point change is considered clinically significant <sup>28</sup> . | ✓ | ✓ | ✓ |
| <i>COVID-19 Stress Scales (CSS)</i>          | COVID-19 related stress and anxiety will be measured using the 36-item CSS survey on five scales: (1) COVID danger and contamination fears, (2) COVID fears about economic consequences, (3) COVID xenophobia, (4) COVID compulsive checking and reassurance seeking, and (5) COVID traumatic stress symptoms <sup>33</sup> .                | Not reported.                                                           | ✓ | ✓ | ✓ |
| <i>Modified Fatigue Impact Scale-21.</i>     | This is a self-reported questionnaire consisting of 21 statements that reflect the perceived impact of fatigue on cognitive, physical, and psychosocial                                                                                                                                                                                      | A 16-point change is considered clinically significant <sup>30</sup> .  | ✓ | ✓ | ✓ |

|                                                    |                                                                                                                                                                                                                                                                                                                                                                                       |                                                                                                                                                                                                                                                                                                              |   |   |   |
|----------------------------------------------------|---------------------------------------------------------------------------------------------------------------------------------------------------------------------------------------------------------------------------------------------------------------------------------------------------------------------------------------------------------------------------------------|--------------------------------------------------------------------------------------------------------------------------------------------------------------------------------------------------------------------------------------------------------------------------------------------------------------|---|---|---|
|                                                    | functioning. Participants are asked to rate the extent to which fatigue has caused problems for them during the last four weeks. Each item is rated on a 5-point scale reflecting how often the person is limited in activities by fatigue, ranging from 0 (never) to 4 (almost always) <sup>31</sup> .                                                                               |                                                                                                                                                                                                                                                                                                              |   |   |   |
| <i>Patient Health Questionnaire-15 (PHQ-15)</i>    | The PHQ-15 measures the severity of 15 somatic symptoms (e.g., fatigue, energy, sleeping trouble, and pain) during the past 4 weeks for a score of 0 to 30. Items can be scored as 0 (not at all), 1 (bothered a little), or 2 (bothered a lot). PHQ-15 scores of 5, 10, and 15 represent cut points for low, medium, and high somatic symptom severity, respectively <sup>32</sup> . | A 5-point change on the PHQ-15 is considered clinically significant.                                                                                                                                                                                                                                         | ✓ | ✓ | ✓ |
| <i>Self-Compassion Scale – Short Form (SCS-SF)</i> | Participants will be asked to complete a 12-item self-reported scale measuring their self-compassion, including self-kindness, self-judgement, humanity, isolation, and mindfulness subscales.<br><br>To encourage their practice and feelings of self-compassion, participants will receive self-compassion messages weekly by email.                                                | Subscale scores are computed by calculating the mean of subscale items responses. Participants will indicate how often they behave in the stated manner, using a scale from 1 (almost never) to 5 (almost always) for a total of 60 points with lower scores indicating more self-compassion <sup>34</sup> . | ✓ | ✓ | ✓ |



SPIRIT 2013 Checklist: Recommended items to address in a clinical trial protocol and related documents\*

| Section/item                      | Item No | Description                                                                                                                                                                                                                                                                                           |
|-----------------------------------|---------|-------------------------------------------------------------------------------------------------------------------------------------------------------------------------------------------------------------------------------------------------------------------------------------------------------|
| <b>Administrative information</b> |         |                                                                                                                                                                                                                                                                                                       |
| Title                             | 1       | Descriptive title identifying the study design, population, interventions, and, if applicable, trial acronym <b>(PG 1)</b>                                                                                                                                                                            |
| Trial registration                | 2a      | Trial identifier and registry name. If not yet registered, name of intended registry <b>(PG 3)</b>                                                                                                                                                                                                    |
|                                   | 2b      | All items from the World Health Organization Trial Registration Data Set <b>(N/A)</b>                                                                                                                                                                                                                 |
| Protocol version                  | 3       | Date and version identifier <b>(N/A)</b>                                                                                                                                                                                                                                                              |
| Funding                           | 4       | Sources and types of financial, material, and other support <b>(PG 20)</b>                                                                                                                                                                                                                            |
| Roles and responsibilities        | 5a      | Names, affiliations, and roles of protocol contributors <b>(PG 1, 2, 20)</b>                                                                                                                                                                                                                          |
|                                   | 5b      | Name and contact information for the trial sponsor <b>(N/A)</b>                                                                                                                                                                                                                                       |
|                                   | 5c      | Role of study sponsor and funders, if any, in study design; collection, management, analysis, and interpretation of data; writing of the report; and the decision to submit the report for publication, including whether they will have ultimate authority over any of these activities <b>(N/A)</b> |
|                                   | 5d      | Composition, roles, and responsibilities of the coordinating centre, steering committee, endpoint adjudication committee, data management team, and other individuals or groups overseeing the trial, if applicable (see Item 21a for data monitoring committee) <b>(N/A)</b>                         |
| <b>Introduction</b>               |         |                                                                                                                                                                                                                                                                                                       |
| Background and rationale          | 6a      | Description of research question and justification for undertaking the trial, including summary of relevant studies (published and unpublished), examining benefits and harms for each intervention <b>(PG 4, 5)</b>                                                                                  |
|                                   | 6b      | Explanation for choice of comparators <b>(PG 7, 8)</b>                                                                                                                                                                                                                                                |
| Objectives                        | 7       | Specific objectives or hypotheses <b>(PG 5)</b>                                                                                                                                                                                                                                                       |
| Trial design                      | 8       | Description of trial design including type of trial (eg, parallel group, crossover, factorial, single group), allocation ratio, and framework (eg, superiority, equivalence, noninferiority, exploratory) <b>(PG 5)</b>                                                                               |

## Methods: Participants, interventions, and outcomes

|                      |     |                                                                                                                                                                                                                                                                                                                                                                                                     |
|----------------------|-----|-----------------------------------------------------------------------------------------------------------------------------------------------------------------------------------------------------------------------------------------------------------------------------------------------------------------------------------------------------------------------------------------------------|
| Study setting        | 9   | Description of study settings (eg, community clinic, academic hospital) and list of countries where data will be collected. Reference to where list of study sites can be obtained <b>(PG 6)</b>                                                                                                                                                                                                    |
| Eligibility criteria | 10  | Inclusion and exclusion criteria for participants. If applicable, eligibility criteria for study centres and individuals who will perform the interventions (eg, surgeons, psychotherapists) <b>(PG 6)</b>                                                                                                                                                                                          |
| Interventions        | 11a | Interventions for each group with sufficient detail to allow replication, including how and when they will be administered <b>(PG 7, 8)</b>                                                                                                                                                                                                                                                         |
|                      | 11b | Criteria for discontinuing or modifying allocated interventions for a given trial participant (eg, drug dose change in response to harms, participant request, or improving/worsening disease) <b>(PG 7)</b>                                                                                                                                                                                        |
|                      | 11c | Strategies to improve adherence to intervention protocols, and any procedures for monitoring adherence (eg, drug tablet return, laboratory tests) <b>(PG 7, 8)</b>                                                                                                                                                                                                                                  |
|                      | 11d | Relevant concomitant care and interventions that are permitted or prohibited during the trial <b>(N/A)</b>                                                                                                                                                                                                                                                                                          |
| Outcomes             | 12  | Primary, secondary, and other outcomes, including the specific measurement variable (eg, systolic blood pressure), analysis metric (eg, change from baseline, final value, time to event), method of aggregation (eg, median, proportion), and time point for each outcome. Explanation of the clinical relevance of chosen efficacy and harm outcomes is strongly recommended <b>(PG 8, 9, 10)</b> |
| Participant timeline | 13  | Time schedule of enrolment, interventions (including any run-ins and washouts), assessments, and visits for participants. A schematic diagram is highly recommended (see Figure) <b>(PG 7, 8, 9. Please see supplementary material Table 1.)</b>                                                                                                                                                    |
| Sample size          | 14  | Estimated number of participants needed to achieve study objectives and how it was determined, including clinical and statistical assumptions supporting any sample size calculations <b>(PG 10)</b>                                                                                                                                                                                                |
| Recruitment          | 15  | Strategies for achieving adequate participant enrolment to reach target sample size <b>(PG 6, 7)</b>                                                                                                                                                                                                                                                                                                |

## Methods: Assignment of interventions (for controlled trials)

Allocation:

|    |                |     |                                                                         |
|----|----------------|-----|-------------------------------------------------------------------------|
| 1  |                |     |                                                                         |
| 2  | Sequence       | 16a | Method of generating the allocation sequence (eg, computer-             |
| 3  | generation     |     | generated random numbers), and list of any factors for stratification.  |
| 4  |                |     | To reduce predictability of a random sequence, details of any planned   |
| 5  |                |     | restriction (eg, blocking) should be provided in a separate document    |
| 6  |                |     | that is unavailable to those who enrol participants or assign           |
| 7  |                |     | interventions <b>(PG 11)</b>                                            |
| 8  |                |     |                                                                         |
| 9  |                |     |                                                                         |
| 10 | Allocation     | 16b | Mechanism of implementing the allocation sequence (eg, central          |
| 11 | concealment    |     | telephone; sequentially numbered, opaque, sealed envelopes),            |
| 12 | mechanism      |     | describing any steps to conceal the sequence until interventions are    |
| 13 |                |     | assigned <b>(PG 11)</b>                                                 |
| 14 |                |     |                                                                         |
| 15 | Implementation | 16c | Who will generate the allocation sequence, who will enrol participants, |
| 16 |                |     | and who will assign participants to interventions <b>(PG 11)</b>        |
| 17 |                |     |                                                                         |
| 18 |                |     |                                                                         |
| 19 | Blinding       | 17a | Who will be blinded after assignment to interventions (eg, trial        |
| 20 | (masking)      |     | participants, care providers, outcome assessors, data analysts), and    |
| 21 |                |     | how <b>(PG 11)</b>                                                      |
| 22 |                |     |                                                                         |
| 23 |                | 17b | If blinded, circumstances under which unblinding is permissible, and    |
| 24 |                |     | procedure for revealing a participant's allocated intervention during   |
| 25 |                |     | the trial <b>(N/A)</b>                                                  |
| 26 |                |     |                                                                         |
| 27 |                |     |                                                                         |

### Methods: Data collection, management, and analysis

|    |                 |     |                                                                               |
|----|-----------------|-----|-------------------------------------------------------------------------------|
| 28 |                 |     |                                                                               |
| 29 |                 |     |                                                                               |
| 30 | Data collection | 18a | Plans for assessment and collection of outcome, baseline, and other           |
| 31 | methods         |     | trial data, including any related processes to promote data quality (eg,      |
| 32 |                 |     | duplicate measurements, training of assessors) and a description of           |
| 33 |                 |     | study instruments (eg, questionnaires, laboratory tests) along with           |
| 34 |                 |     | their reliability and validity, if known. Reference to where data             |
| 35 |                 |     | collection forms can be found, if not in the protocol <b>(PG 8, 9. Please</b> |
| 36 |                 |     | <b>see supplementary material Table 1.)</b>                                   |
| 37 |                 |     |                                                                               |
| 38 |                 |     |                                                                               |
| 39 |                 | 18b | Plans to promote participant retention and complete follow-up,                |
| 40 |                 |     | including list of any outcome data to be collected for participants who       |
| 41 |                 |     | discontinue or deviate from intervention protocols <b>(Please see</b>         |
| 42 |                 |     | <b>supplementary material Table 1.)</b>                                       |
| 43 |                 |     |                                                                               |
| 44 |                 |     |                                                                               |
| 45 | Data            | 19  | Plans for data entry, coding, security, and storage, including any            |
| 46 | management      |     | related processes to promote data quality (eg, double data entry;             |
| 47 |                 |     | range checks for data values). Reference to where details of data             |
| 48 |                 |     | management procedures can be found, if not in the protocol <b>(PG 11)</b>     |
| 49 |                 |     |                                                                               |
| 50 |                 |     |                                                                               |
| 51 | Statistical     | 20a | Statistical methods for analysing primary and secondary outcomes.             |
| 52 | methods         |     | Reference to where other details of the statistical analysis plan can be      |
| 53 |                 |     | found, if not in the protocol <b>(PG 11, 12)</b>                              |
| 54 |                 |     |                                                                               |
| 55 |                 | 20b | Methods for any additional analyses (eg, subgroup and adjusted                |
| 56 |                 |     | analyses) <b>(PG 11, 12)</b>                                                  |
| 57 |                 |     |                                                                               |
| 58 |                 |     |                                                                               |
| 59 |                 |     |                                                                               |
| 60 |                 |     |                                                                               |



- 1  
2  
3  
4  
5  
6  
7  
8  
9  
10  
11  
12  
13  
14  
15  
16  
17  
18  
19  
20  
21  
22  
23  
24  
25  
26  
27  
28  
29  
30  
31  
32  
33  
34  
35  
36  
37  
38  
39  
40  
41  
42  
43  
44  
45  
46  
47  
48  
49  
50  
51  
52  
53  
54  
55  
56  
57  
58  
59  
60
- 20c Definition of analysis population relating to protocol non-adherence (eg, as randomised analysis), and any statistical methods to handle missing data (eg, multiple imputation) **(PG 12)**

### Methods: Monitoring

- Data monitoring 21a Composition of data monitoring committee (DMC); summary of its role and reporting structure; statement of whether it is independent from the sponsor and competing interests; and reference to where further details about its charter can be found, if not in the protocol. Alternatively, an explanation of why a DMC is not needed **(N/A)**
- 21b Description of any interim analyses and stopping guidelines, including who will have access to these interim results and make the final decision to terminate the trial **(N/A)**
- Harms 22 Plans for collecting, assessing, reporting, and managing solicited and spontaneously reported adverse events and other unintended effects of trial interventions or trial conduct **(N/A)**
- Auditing 23 Frequency and procedures for auditing trial conduct, if any, and whether the process will be independent from investigators and the sponsor **(N/A)**

### Ethics and dissemination

- Research ethics approval 24 Plans for seeking research ethics committee/institutional review board (REC/IRB) approval **(PG 14)**
- Protocol amendments 25 Plans for communicating important protocol modifications (eg, changes to eligibility criteria, outcomes, analyses) to relevant parties (eg, investigators, REC/IRBs, trial participants, trial registries, journals, regulators) **(PG 14)**
- Consent or assent 26a Who will obtain informed consent or assent from potential trial participants or authorised surrogates, and how (see Item 32) **(PG 14)**
- 26b Additional consent provisions for collection and use of participant data and biological specimens in ancillary studies, if applicable **(N/A)**
- Confidentiality 27 How personal information about potential and enrolled participants will be collected, shared, and maintained in order to protect confidentiality before, during, and after the trial **(PG 11)**
- Declaration of interests 28 Financial and other competing interests for principal investigators for the overall trial and each study site **(PG 20)**
- Access to data 29 Statement of who will have access to the final trial dataset, and disclosure of contractual agreements that limit such access for investigators **(PG 20)**

|    |                   |     |                                                                                |
|----|-------------------|-----|--------------------------------------------------------------------------------|
| 1  |                   |     |                                                                                |
| 2  | Ancillary and     | 30  | Provisions, if any, for ancillary and post-trial care, and for                 |
| 3  | post-trial care   |     | compensation to those who suffer harm from trial participation ( <b>Please</b> |
| 4  |                   |     | <b>see the study consent form.</b> )                                           |
| 5  |                   |     |                                                                                |
| 6  | Dissemination     | 31a | Plans for investigators and sponsor to communicate trial results to            |
| 7  | policy            |     | participants, healthcare professionals, the public, and other relevant         |
| 8  |                   |     | groups (eg, via publication, reporting in results databases, or other          |
| 9  |                   |     | data sharing arrangements), including any publication restrictions ( <b>pg</b> |
| 10 |                   |     | <b>14, 15</b> )                                                                |
| 11 |                   |     |                                                                                |
| 12 |                   |     |                                                                                |
| 13 |                   | 31b | Authorship eligibility guidelines and any intended use of professional         |
| 14 |                   |     | writers ( <b>N/A</b> )                                                         |
| 15 |                   |     |                                                                                |
| 16 |                   | 31c | Plans, if any, for granting public access to the full protocol, participant-   |
| 17 |                   |     | level dataset, and statistical code ( <b>N/A</b> )                             |
| 18 |                   |     |                                                                                |
| 19 |                   |     |                                                                                |
| 20 | <b>Appendices</b> |     |                                                                                |
| 21 |                   |     |                                                                                |
| 22 | Informed consent  | 32  | Model consent form and other related documentation given to                    |
| 23 | materials         |     | participants and authorised surrogates ( <b>Please see the study</b>           |
| 24 |                   |     | <b>consent form.</b> )                                                         |
| 25 |                   |     |                                                                                |
| 26 | Biological        | 33  | Plans for collection, laboratory evaluation, and storage of biological         |
| 27 | specimens         |     | specimens for genetic or molecular analysis in the current trial and for       |
| 28 |                   |     | future use in ancillary studies, if applicable ( <b>N/A</b> )                  |
| 29 |                   |     |                                                                                |

---

\*It is strongly recommended that this checklist be read in conjunction with the SPIRIT 2013 Explanation & Elaboration for important clarification on the items. Amendments to the protocol should be tracked and dated. The SPIRIT checklist is copyrighted by the SPIRIT Group under the Creative Commons "[Attribution-NonCommercial-NoDerivs 3.0 Unported](https://creativecommons.org/licenses/by-nc-nd/3.0/)" license.
